# Supplementary material
Source: PubMed Central journal article supplement (PMC1449519)

| Probe Set   | Gene name                                                                                      | Genbank   | cytogenet |        |                 |              | t-test   | mean fold change |      |
|-------------|------------------------------------------------------------------------------------------------|-----------|-----------|--------|-----------------|--------------|----------|------------------|------|
|             |                                                                                                |           | LocusLink | band   | avg Ctrl        | avg PSA diff |          |                  |      |
| 218659_at   | KIAA1685 protein (additional sex combs like 2 (Drosophila))                                    | NM_018263 | 55252     | 2p24   | <b>9417.71</b>  | 16804.31     | 7386.59  | 2.08E-08         | 1.78 |
| 209964_s_at | spinocerebellar ataxia 7 (olivopontocerebellar atrophy with retinal degeneration)              | AF032105  | 6314      | 3p21   | <b>2681.55</b>  | 4719.953     | 2038.40  | 2.71E-07         | 1.76 |
| 201991_s_at | kinesin family member 5B                                                                       | BF223224  | 3799      | 10pter | <b>4152.82</b>  | 6936.916     | 2784.10  | 2.51E-06         | 1.67 |
| 216022_at   | WNK lysine deficient protein kinase 1 (WNK1)                                                   | AL049278  | 65125     | 12p13  | <b>233.25</b>   | 703.1368     | 469.88   | 1.28E-05         | 3.01 |
| 215452_x_at | SMT3 suppressor of mif two 3 homolog 4 (yeast) (SUMO4)                                         | AL031133  | 387082    | 6q25   | <b>2932.81</b>  | 4638.637     | 1705.83  | 1.53E-05         | 1.58 |
| 205863_at   | S100 calcium binding protein A12 (calgranulin C)                                               | NM_005621 | 6283      | 1q21   | <b>7604.28</b>  | 23690.1      | 16085.82 | 1.87E-05         | 3.12 |
| 206765_at   | potassium inwardly-rectifying channel, subfamily J, member 2                                   | AF153820  | 3759      | 17q23  | <b>7088.88</b>  | 11591.51     | 4502.63  | 3.11E-05         | 1.64 |
| 217868_s_at | DORA reverse strand protein 1 (DREV1) CGI-81 protein                                           | NM_016025 | 51108     | 16p13  | <b>6514.16</b>  | 10604.53     | 4090.36  | 3.18E-05         | 1.63 |
| 209555_s_at | CD36 antigen (collagen type I receptor, thrombospondin receptor)                               | M98399    | 948       | 7q11   | <b>2498.94</b>  | 4625.216     | 2126.28  | 3.96E-05         | 1.85 |
| 205191_at   | retinitis pigmentosa 2 (X-linked recessive)                                                    | NM_006915 | 6102      | Xp11   | <b>496.72</b>   | 870.4368     | 373.72   | 4.35E-05         | 1.75 |
| 213524_s_at | putative lymphocyte G0/G1 switch gene                                                          | NM_015714 | 50486     | 1q32   | <b>670.46</b>   | 1174.832     | 504.37   | 7.27E-05         | 1.75 |
| 204071_s_at | tumor protein p53-binding protein                                                              | NM_005802 | 10210     | 12p12  | <b>548.71</b>   | 976.0895     | 427.38   | 9.02E-05         | 1.78 |
| 220122_at   | hypothetical protein FLJ22344                                                                  | NM_024717 | 79772     | 5q15   | <b>561.71</b>   | 1051.811     | 490.10   | 0.000113         | 1.87 |
| 216210_x_at | putative nuclear protein                                                                       | AA046650  | 11078     | 22q13  | <b>5184.37</b>  | 7903.2       | 2718.83  | 0.000207         | 1.52 |
| 204859_s_at | apoptotic protease activating factor                                                           | NM_013229 | 317       | 12q23  | <b>1205.06</b>  | 1824.542     | 619.48   | 0.000257         | 1.51 |
| 214182_at   | ADP-ribosylation factor 6                                                                      | AA243143  | 382       | 7q22   | <b>2177.39</b>  | 4852.868     | 2675.48  | 0.00026          | 2.23 |
| 222320_at   | Hyperparathyroidism 2 (with jaw tumor)                                                         | AW970584  | 79577     | 1q25   | <b>159.71</b>   | 309.9053     | 150.19   | 0.000273         | 1.94 |
| 202917_s_at | S100 calcium binding protein A8 (calgranulin A)                                                | NM_002964 | 6279      | 1q21   | <b>66247.22</b> | 126618       | 60370.74 | 0.000308         | 1.91 |
| 217769_s_at | hypothetical protein                                                                           | NM_015932 | 51371     | 13q12  | <b>5595.99</b>  | 9220.453     | 3624.46  | 0.000313         | 1.65 |
| 213902_at   | N-acylsphingosine amidohydrolase (acid ceramidase)                                             | AI379338  | 427       | 8p22   | <b>2607.45</b>  | 4043.926     | 1436.47  | 0.00032          | 1.55 |
| 204059_s_at | malic enzyme 1, NADP(+)-dependent, cytosolic                                                   | NM_002395 | 4199      | 6q12   | <b>332.89</b>   | 534.2158     | 201.32   | 0.000371         | 1.60 |
| 202626_s_at | LYN                                                                                            | NM_002350 | 4067      | 8q13   | <b>16212.88</b> | 25824.29     | 9611.41  | 0.000375         | 1.59 |
| 205070_at   | inhibitor of growth family, member 3                                                           | NM_019071 | 54556     | 7q31   | <b>1921.62</b>  | 3077.316     | 1155.69  | 0.000414         | 1.60 |
| 221829_s_at | karyopherin (importin) beta 2                                                                  | AI307759  | 3842      | 17p11  | <b>7214.05</b>  | 11470.59     | 4256.54  | 0.000435         | 1.59 |
| 214807_at   | MRNA; cDNA DKFZp564O0862 (from clone DKFZp564O0862)                                            | AI278204  | 278204    | X      | <b>872.23</b>   | 1352.763     | 480.53   | 0.000442         | 1.55 |
| 205551_at   | synaptic vesicle protein 2B homolog                                                            | NM_014848 | 9899      | 15q26  | <b>126.92</b>   | 243.2579     | 116.34   | 0.000447         | 1.92 |
| 206420_at   | immunoglobulin superfamily, member 6 (DORA, down-regulation by activation)                     | NM_005849 | 10261     | 16p12  | <b>3568.95</b>  | 5944.853     | 2375.90  | 0.000451         | 1.67 |
| 202437_s_at | cytochrome P450, subfamily I (dioxin-inducible), polypeptide 1 (glaucoma 3, primary infantile) | NM_000104 | 1545      | 2p21   | <b>755.45</b>   | 1720.389     | 964.94   | 0.000468         | 2.28 |
| 213805_at   | abhydrolase domain containing 5 (ABHD5)                                                        | AI692428  | 51099     | 3p21   | <b>1188.64</b>  | 2518.495     | 1329.86  | 0.000498         | 2.12 |
| 202600_s_at |                                                                                                | AI824012  | 8204      | 21q11  | <b>614.34</b>   | 1081.463     | 467.13   | 0.000533         | 1.76 |
| 214800_x_at | basic transcription factor 3 (BTF3)                                                            | R83000    | 689       | 5q13   | <b>5064.20</b>  | 9554.953     | 4490.75  | 0.000534         | 1.89 |
| 202381_at   | a disintegrin and metalloproteinase domain 9 (meltrin gamma)                                   | NM_003816 | 8754      | 8p11   | <b>413.39</b>   | 758.7263     | 345.33   | 0.000553         | 1.84 |
| 215779_s_at | H2B histone family, member A                                                                   | BE271470  | 8339      | 6p21   | <b>412.68</b>   | 810.9684     | 398.29   | 0.000568         | 1.97 |
| 215039_at   | Hypothetical protein LOC339524                                                                 | AK002179  | 339524    | 1p22   | <b>183.07</b>   | 396.2        | 213.13   | 0.000576         | 2.16 |
| 208864_s_at | Thioredoxin (TXN)                                                                              | AF313911  | 7295      | 9q31   | <b>964.60</b>   | 2541.179     | 1576.58  | 0.000577         | 2.63 |
| 201738_at   | translation factor sui1 homolog                                                                | NM_005875 | 10289     | 3p21   | <b>5670.44</b>  | 10115.67     | 4445.23  | 0.000606         | 1.78 |
| 207234_at   | regulatory factor X, 3 (influences HLA class II expression)                                    | NM_002919 | 5991      | 9p22   | <b>365.32</b>   | 601.6526     | 236.34   | 0.000609         | 1.65 |
| 211201_at   | follicle stimulating hormone receptor                                                          | M95489    | 2492      | 2p21   | <b>85.86</b>    | 179.1789     | 93.32    | 0.000612         | 2.09 |
| 206343_s_at | neuregulin 1                                                                                   | NM_013959 | 3084      | 8p21   | <b>307.83</b>   | 751.8632     | 444.03   | 0.000616         | 2.44 |
| 213624_at   | acid sphingomyelinase-like phosphodiesterase                                                   | AA873600  | 10924     | 6q22   | <b>539.25</b>   | 957.3895     | 418.14   | 0.000652         | 1.78 |
| 220330_s_at | SAM domain, SH3 domain and nuclear localisation signals, 1                                     | NM_022136 | 64092     | 21q11  | <b>780.83</b>   | 1624.895     | 844.06   | 0.000667         | 2.08 |
| 206145_at   | Rhesus blood group-associated glycoprotein                                                     | NM_000324 | 6005      | 6p21   | <b>220.28</b>   | 399.0526     | 178.77   | 0.000698         | 1.81 |
| 208523_x_at | H2B histone family, member K                                                                   | NM_003525 | 8346      | 6p21   | <b>633.21</b>   | 1052.063     | 418.85   | 0.000698         | 1.66 |
| 202430_s_at | phospholipid scramblase 1                                                                      | NM_021105 | 5359      | 3q23   | <b>1191.89</b>  | 1989.284     | 797.39   | 0.000709         | 1.67 |
| 203672_x_at | thiopurine S-methyltransferase                                                                 | U12387    | 7172      | 6p22   | <b>1120.08</b>  | 1923.311     | 803.23   | 0.000783         | 1.72 |
| 215438_x_at | G1 to S phase transition 1                                                                     | BE906054  | 2935      | 16p13  | <b>7369.60</b>  | 16038.47     | 8668.87  | 0.000791         | 2.18 |
| 215786_at   | Hepatitis B virus x associated protein (HBXAP)                                                 | AK022170  | 51773     | 11q13  | <b>969.56</b>   | 1659.184     | 689.63   | 0.000806         | 1.71 |
| 203735_x_at | PTPRF interacting protein, binding protein 1 (liprin beta 1)                                   | N35896    | 8496      | 12p11  | <b>512.91</b>   | 1110.5       | 597.59   | 0.000816         | 2.17 |
| 207500_at   | caspase 5, apoptosis-related cysteine protease                                                 | NM_004347 | 838       | 11q22  | <b>470.27</b>   | 768.1947     | 297.92   | 0.000822         | 1.63 |
| 222303_at   | Homo sapiens ETS2 intronic transcript 1 mRNA, complete sequence.                               | AV700891  | AY216265  | 21q22  | <b>1742.03</b>  | 3015.974     | 1273.94  | 0.000861         | 1.73 |

|             |                                            |           |             |                 |          |         |          |      |
|-------------|--------------------------------------------|-----------|-------------|-----------------|----------|---------|----------|------|
| 221205_at   | hypothetical protein FLJ10254              | NM_018041 | 55694 0     | <b>610.95</b>   | 982.1842 | 371.24  | 0.000869 | 1.61 |
| 220411_x_at | hypothetical protein FLJ23447              | NM_024825 | 79883 19p13 | <b>675.44</b>   | 1080.495 | 405.06  | 0.000874 | 1.60 |
| 220327_at   | colon carcinoma related protein            | NM_016206 | 51159 3p11  | <b>67.99</b>    | 206.4895 | 138.49  | 0.000937 | 3.04 |
| 219754_at   | hypothetical protein FLJ11016              | NM_018301 | 55285 Xq22  | <b>421.26</b>   | 859.1368 | 437.87  | 0.000957 | 2.04 |
| 201963_at   | fatty-acid-Coenzyme A ligase, long-chain 2 | NM_021122 | 2180 4q34   | <b>12906.13</b> | 22462.58 | 9556.45 | 0.000976 | 1.74 |
| 218303_x_at | hypothetical protein LOC51315              | NM_016618 | 51315 2p11  | <b>1308.72</b>  | 2055.305 | 746.58  | 0.000984 | 1.57 |

| Probe Set   | Gene name                                                                        | Genbank  | LocusLink | cytoget<br>band | mean Ctrl       | mean PSA | difference | t-test      | mean fold<br>change | mean fold |        |         |
|-------------|----------------------------------------------------------------------------------|----------|-----------|-----------------|-----------------|----------|------------|-------------|---------------------|-----------|--------|---------|
|             |                                                                                  |          |           |                 |                 |          |            |             |                     | NP1       | NP2    | NP3     |
| 212890_at   | integrin, beta 1 (fibronectin receptor, beta polypeptide, antigen CD29)          | BF663461 | 3688      | 10p11           | <b>3750.65</b>  | 2225.43  | -1525.22   | 7.40889E-06 | 1.69                | 3183.4    | 2079.8 | 3539.1  |
| 209916_at   | hypothetical protein DKFZp762M115                                                | BC002477 | 55526     | 10p14           | <b>1010.71</b>  | 412.72   | -597.99    | 7.27289E-06 | 2.45                | 103.6     | 1310.7 | 1347.3  |
| 57715_at    | hypothetical protein                                                             | W72694   | 51063     | 10pter          | <b>3279.82</b>  | 2164.68  | -1115.14   | 4.99349E-06 | 1.52                | 3692.9    | 2804.1 | 3321.5  |
| 212359_s_at | KIAA0913 protein                                                                 | W89120   | 23053     | 10q22           | <b>2515.19</b>  | 1575.46  | -939.73    | 0.000274577 | 1.60                | 1577.6    | 1501.3 | 2709.5  |
| 214617_at   | perforin 1 (pore forming protein)                                                | AI445650 | 5551      | 10q22           | <b>21817.15</b> | 12032.79 | -9784.36   | 1.11306E-05 | 1.81                | 20608.6   | 17911  | 21347.2 |
| 210461_s_at | actin binding LIM protein 1                                                      | BC002448 | 3983      | 10q25           | <b>1688.97</b>  | 881.56   | -807.42    | 0.00010207  | 1.92                | 712.6     | 2323.1 | 1911.8  |
| 201135_at   | enoyl Coenzyme A hydratase, short chain, 1, mitochondrial                        | NM_00409 | 1892      | 10q26           | <b>4117.77</b>  | 2741.93  | -1375.85   | 0.000151637 | 1.50                | 4774.2    | 3776   | 6739.2  |
| 209489_at   | CUG triplet repeat, RNA binding protein 1                                        | N25915   | 10658     | 11p11           | <b>7749.12</b>  | 4734.17  | -3014.95   | 2.52584E-05 | 1.64                | 6278.1    | 6803.1 | 8196.8  |
| 217759_at   | DIPB protein                                                                     | BF431488 | 54765     | 11p13           | <b>3995.38</b>  | 2623.15  | -1372.24   | 0.000958805 | 1.52                | 2319.7    | 2647.9 | 3459.5  |
| 200675_at   | CD81 antigen (target of antiproliferative antibody 1)                            | NM_00435 | 975       | 11p15           | <b>6766.15</b>  | 3812.25  | -2953.90   | 2.91655E-05 | 1.77                | 7942.1    | 3724.1 | 7177.7  |
| 218921_at   | single Ig IL-1R-related molecule, SIGIRR, TOLL/IL1R 8 (TIR8)                     | NM_02180 | 59307     | 11p15           | <b>2318.33</b>  | 1312.86  | -1005.46   | 5.62297E-05 | 1.77                | 1749.5    | 1822.2 | 1800.3  |
| 219359_at   | hypothetical protein FLJ22635                                                    | NM_02509 | 80162     | 11p15           | <b>2397.29</b>  | 1358.50  | -1038.79   | 0.000284479 | 1.76                | 1346.7    | 2165.8 | 2697.2  |
| 202109_at   | partner of RAC1 (arfaptin 2)                                                     | NM_01240 | 23647     | 11p15           | <b>2192.48</b>  | 1460.65  | -731.83    | 0.000161908 | 1.50                | 2072.2    | 1027   | 1983.3  |
| 203942_s_at | ELKL motif kinase                                                                | NM_01749 | 2011      | 11q12           | <b>1072.21</b>  | 231.43   | -840.78    | 4.46731E-06 | 4.63                | 572.7     | 132.2  | 950.9   |
| 212969_x_at | metastasis-associated 1-like 1                                                   | BE222618 | 9219      | 11q12           | <b>4035.78</b>  | 2514.90  | -1520.88   | 8.8396E-06  | 1.60                | 2815.1    | 2361.9 | 4245.7  |
| 208922_s_at | nuclear RNA export factor 1                                                      | BC004904 | 10482     | 11q12           | <b>6152.21</b>  | 3955.62  | -2196.59   | 9.51777E-06 | 1.56                | 6469.8    | 3922.6 | 7234.5  |
| 43511_s_at  | MRNA; cDNA DKFZp762M127 (from clone DKFZp762M127)                                | AI201594 | Hs.550621 | 11q13           | <b>5443.93</b>  | 3608.85  | -1835.08   | 0.000281279 | 1.51                | 4423.4    | 4749.4 | 5224.8  |
| 204178_s_at | RNA binding motif protein 14                                                     | NM_00632 | 10432     | 11q13           | <b>1379.41</b>  | 690.30   | -689.11    | 8.6055E-05  | 2.00                | 710.3     | 1783.7 | 2486.5  |
| 214450_at   | cathepsin W (lymphopain)                                                         | NM_00133 | 1521      | 11q13           | <b>6304.16</b>  | 3874.74  | -2429.42   | 0.000463977 | 1.63                | 8268.9    | 2853.7 | 6959.8  |
| 204164_at   | signal-induced proliferation-associated gene 1 (SIPA1)                           | NM_00674 | 6494      | 11q13           | <b>3595.89</b>  | 2185.49  | -1410.40   | 0.000819438 | 1.65                | 3902.9    | 1065.9 | 4347.7  |
| 208313_s_at | splicing factor 1                                                                | NM_00463 | 7536      | 11q13           | <b>7412.59</b>  | 4149.27  | -3263.32   | 1.45357E-06 | 1.79                | 4318.5    | 4351.7 | 7372.7  |
| 208206_s_at | RAS guanyl releasing protein 2 (calcium and DAG-regulated)                       | NM_00582 | 10235     | 11q13           | <b>5054.04</b>  | 2811.86  | -2242.18   | 1.60517E-05 | 1.80                | 4598.2    | 5664.5 | 5379.5  |
| 203252_at   | tumor suppressor deleted in oral cancer-related 1                                | NM_00585 | 10263     | 11q13           | <b>1559.28</b>  | 920.44   | -638.84    | 2.02701E-05 | 1.69                | 2128.3    | 772.3  | 1784.8  |
| 202116_at   | requiem, apoptosis response zinc finger gene (REQ)                               | NM_00626 | 5977      | 11q13           | <b>4534.62</b>  | 2678.69  | -1855.92   | 0.000312244 | 1.69                | 3773      | 341.3  | 7327.3  |
| 205436_s_at | H2A histone family, member X                                                     | NM_00210 | 3014      | 11q23           | <b>1659.92</b>  | 922.74   | -737.18    | 5.24891E-05 | 1.80                | 2225.7    | 863.4  | 1881.3  |
| 206126_at   | Burkitt lymphoma receptor 1, GTP binding protein (CXCR5)                         | NM_00171 | 643       | 11q23           | <b>1472.51</b>  | 850.28   | -622.22    | 0.000663654 | 1.73                | 2190.6    | 800    | 956.7   |
| 212078_s_at | myeloid/lymphoid or mixed-lineage leukemia (trithorax homolog, Drosophila)       | AA704766 | 4297      | 11q23           | <b>2127.07</b>  | 1193.93  | -933.14    | 9.49095E-07 | 1.78                | 1669.8    | 2253.4 | 1722.6  |
| 218774_at   | HSPC015 protein                                                                  | NM_01402 | 28960     | 11q24           | <b>1147.89</b>  | 477.58   | -670.32    | 5.65139E-05 | 2.40                | 797.5     | 1457.3 | 1858.2  |
| 201600_at   | B-cell associated protein, PHB2                                                  | NM_00727 | 11331     | 12p13           | <b>14897.88</b> | 9669.92  | -5227.96   | 2.21678E-06 | 1.54                | 20508.6   | 8635.4 | 15360.3 |
| 206150_at   | tumor necrosis factor receptor superfamily, member 7 (CD27)                      | NM_00124 | 939       | 12p13           | <b>7068.02</b>  | 4239.03  | -2828.99   | 1.4667E-05  | 1.67                | 6680.2    | 5296.3 | 5893.5  |
| 218338_at   | early development regulator 1 (homolog of polyhomeotic 1)                        | NM_00442 | 1911      | 12p13           | <b>1854.32</b>  | 890.05   | -964.27    | 6.39289E-05 | 2.08                | 592.8     | 257.5  | 1428.1  |
| 206687_s_at | protein tyrosine phosphatase, non-receptor type 6 (SHP1)                         | NM_00283 | 5777      | 12p13           | <b>20430.79</b> | 12753.10 | -7677.69   | 9.82807E-05 | 1.60                | 16243.3   | 9724.5 | 23074.9 |
| 201184_s_at | chromodomain helicase DNA binding protein 4                                      | NM_00127 | 1108      | 12p13           | <b>4967.67</b>  | 3128.62  | -1839.05   | 0.000295648 | 1.59                | 1626.1    | 2983.7 | 4751.3  |
| 201313_at   | enolase 2, (gamma, neuronal)                                                     | NM_00197 | 2026      | 12p13           | <b>1341.41</b>  | 837.41   | -504.00    | 0.000366967 | 1.60                | 387.8     | 1695.1 | 1133.5  |
| 204255_s_at | vitamin D (1,25- dihydroxyvitamin D3) receptor                                   | AA772285 | 7421      | 12q12           | <b>1436.70</b>  | 858.75   | -577.95    | 1.54002E-05 | 1.67                | 1169.5    | 780    | 939.9   |
| 218841_at   | ankyrin repeat and SOCS box-containing 8, ASB8                                   | NM_02409 | 79076     | 12q13           | <b>1713.59</b>  | 983.01   | -730.59    | 0.000328604 | 1.74                | 1004.4    | 854.3  | 1620.2  |
| 208858_s_at | KIAA0747 protein                                                                 | BC004998 | 23344     | 12q13           | <b>4511.08</b>  | 2327.21  | -2183.87   | 1.25645E-05 | 1.94                | 3060.5    | 2482.1 | 4351    |
| 207170_s_at | DKFZP586A011 protein                                                             | NM_01541 | 25875     | 12q13           | <b>3309.81</b>  | 2090.96  | -1218.84   | 1.47686E-05 | 1.58                | 3145.7    | 2190.8 | 4248.1  |
| 201440_at   | prp28, U5 snRNP 100 kd protein                                                   | NM_00481 | 9416      | 12q13           | <b>2432.45</b>  | 1130.87  | -1301.58   | 0.00017181  | 2.15                | 539.5     | 348.1  | 3072.1  |
| 202519_at   | KIAA0867 protein                                                                 | NM_01493 | 22877     | 12q21           | <b>3416.23</b>  | 1699.07  | -1717.15   | 3.50758E-06 | 2.01                | 1997.7    | 1343.9 | 2314.2  |
| 212139_at   | GCN1 general control of amino-acid synthesis 1-like 1 (yeast)                    | D86973   | 10985     | 12q24           | <b>2027.58</b>  | 1278.73  | -748.85    | 3.16396E-06 | 1.59                | 1359.7    | 2161   | 1839.8  |
| 211941_s_at | prostatic binding protein                                                        | BE969671 | 5037      | 12q24           | <b>5333.61</b>  | 3442.97  | -1890.64   | 7.29422E-05 | 1.55                | 6620.2    | 4828.9 | 4948.3  |
| 219267_at   | glycolipid transfer protein                                                      | NM_01643 | 51228     | 12q24           | <b>1361.58</b>  | 840.28   | -521.29    | 0.000537235 | 1.62                | 1341.4    | 802.8  | 1711    |
| 202723_s_at | forkhead box O1A (rhabdomyosarcoma)                                              | AW117498 | 2308      | 13q14           | <b>4630.12</b>  | 1713.26  | -2916.86   | 3.05558E-08 | 2.70                | 2192.5    | 2671.6 | 3614.3  |
| 213398_s_at | HCDI protein                                                                     | AI347090 | 56948     | 14q11           | <b>3577.32</b>  | 2245.89  | -1331.43   | 1.48204E-07 | 1.59                | 2370.4    | 2970.5 | 3825.4  |
| 213594_x_at | FUS interacting protein (serine-arginine rich) 1                                 | AU130523 | 63902     | 14q22           | <b>2385.14</b>  | 1486.56  | -898.58    | 3.34258E-06 | 1.60                | 1741.5    | 2348.2 | 1820.3  |
| 202761_s_at | synaptic nuclei expressed gene 2                                                 | NM_01518 | 23224     | 14q23           | <b>3142.78</b>  | 2066.57  | -1076.21   | 2.62017E-05 | 1.52                | 1704.5    | 2449.1 | 3408.7  |
| 215210_s_at | dihydrolipoamide S-succinyltransferase (E2 component of 2-oxo-glutarate complex) | S72422   | 1743      | 14q24           | <b>1966.37</b>  | 1245.33  | -721.04    | 3.27901E-06 | 1.58                | 1620.9    | 2641.7 | 2309.4  |
| 222285_at   | immunoglobulin heavy constant delta, IGHD                                        | AW134608 | 3495      | 14q32           | <b>1321.20</b>  | 710.12   | -611.08    | 0.000629334 | 1.86                | 1415.7    | 1165.5 | 1253.3  |
| 212827_at   | immunoglobulin heavy constant mu                                                 | X17115   | 3507      | 14q32           | <b>12491.85</b> | 5911.85  | -6580.01   | 3.27329E-07 | 2.11                | 11073.6   | 7683.7 | 11229.8 |

|             |                                                                                       |          |             |                 |          |           |             |      |         |         |         |
|-------------|---------------------------------------------------------------------------------------|----------|-------------|-----------------|----------|-----------|-------------|------|---------|---------|---------|
| 220439_at   | hypothetical protein FLJ11700                                                         | NM_02489 | 79952 14q32 | <b>1840.77</b>  | 1082.14  | -758.63   | 7.99153E-07 | 1.70 | 1702    | 2664.7  | 1235.1  |
| 217838_s_at | RNB6                                                                                  | NM_01633 | 51466 14q32 | <b>6942.84</b>  | 4307.28  | -2635.56  | 1.52111E-06 | 1.61 | 5483.7  | 6713.7  | 7884.2  |
| 211783_s_at | metastasis associated 1                                                               | BC006177 | 9112 14q32  | <b>1596.25</b>  | 968.18   | -628.07   | 8.82161E-06 | 1.65 | 707.4   | 1189.8  | 1443.9  |
| 204756_at   | mitogen-activated protein kinase kinase 5 (MEK5 or MAP2K5)                            | NM_00275 | 5607 15q22  | <b>636.21</b>   | 250.88   | -385.33   | 0.000401234 | 2.54 | 1590.3  | 1253.9  | 542.6   |
| 219066_at   | hypothetical protein MDS018                                                           | NM_02182 | 60490 15q23 | <b>1340.00</b>  | 716.53   | -623.47   | 3.41498E-05 | 1.87 | 1283.6  | 1606.4  | 1934.1  |
| 74694_s_at  | hypothetical protein FLJ23282                                                         | AA907940 | 79874 16p11 | <b>1310.18</b>  | 803.11   | -507.08   | 3.56862E-06 | 1.63 | 892.1   | 1944.7  | 1451    |
| 209685_s_at | protein kinase C, beta 1                                                              | M13975   | 5579 16p11  | <b>15980.18</b> | 10215.49 | -5764.69  | 6.72917E-07 | 1.56 | 18589.6 | 10912.7 | 21108.9 |
| 207907_at   | tumor necrosis factor (ligand) superfamily, member 14                                 | NM_00380 | 8740 16p11  | <b>3184.18</b>  | 1796.98  | -1387.20  | 5.56093E-06 | 1.77 | 2366.9  | 2578.2  | 2980.8  |
| 218714_at   | hypothetical protein MGC3121                                                          | NM_02403 | 78994 16p11 | <b>2987.41</b>  | 1623.93  | -1363.48  | 6.50458E-06 | 1.84 | 2262.6  | 1550.9  | 3599    |
| 212275_s_at | Snf2-related CBP activator protein                                                    | NM_00666 | 10847 16p11 | <b>1594.47</b>  | 954.98   | -639.49   | 0.000300706 | 1.67 | 1545.6  | 928.4   | 1698.8  |
| 217891_at   | hypothetical protein FLJ13868                                                         | NM_02274 | 64755 16p11 | <b>812.99</b>   | 383.93   | -429.06   | 0.000780614 | 2.12 | 286.8   | 45      | 844.7   |
| 203709_at   | phosphorylase kinase, gamma 2 (testis)                                                | NM_00029 | 5261 16p12  | <b>1500.31</b>  | 913.85   | -586.46   | 0.000346663 | 1.64 | 1848.2  | 1331    | 1578.6  |
| 212576_at   | KIAA0544 protein                                                                      | AB011116 | 23295 16p13 | <b>4054.53</b>  | 2672.60  | -1381.93  | 6.42807E-05 | 1.52 | 3292.1  | 3624.7  | 4636.7  |
| 204524_at   | 3-phosphoinositide dependent protein kinase-1                                         | NM_00261 | 5170 16p13  | <b>2606.04</b>  | 955.02   | -1651.03  | 8.77156E-09 | 2.73 | 1595.8  | 1363.2  | 2619.8  |
| 218848_at   | hypothetical protein MGC2655                                                          | NM_02433 | 79228 16p13 | <b>1423.15</b>  | 826.41   | -596.74   | 4.21631E-06 | 1.72 | 1322.2  | 1347.8  | 995.2   |
| 213639_s_at | KIAA0557 protein                                                                      | AI871396 | 26048 16p13 | <b>1566.04</b>  | 794.95   | -771.09   | 8.9682E-06  | 1.97 | 878.5   | 1862.4  | 1091.2  |
| 219040_at   | coronin 7 (CORO7)                                                                     | NM_02453 | 79585 16p13 | <b>1815.69</b>  | 1098.34  | -717.35   | 0.000599124 | 1.65 | 1032.5  | 2182.9  | 2227.1  |
| 210555_s_at | nuclear factor of activated T-cells, cytoplasmic, calcineurin-dependent 3 (NFATC3)    | U85430   | 4775 16q13  | <b>2860.70</b>  | 1679.10  | -1181.60  | 0.000490762 | 1.70 | 2452.5  | 1019.5  | 2475.5  |
| 1729_at     | TNFRSF1A-associated via death domain (TRADD)                                          | L41690   | 8717 16q22  | <b>2762.66</b>  | 1559.04  | -1203.63  | 0.000349393 | 1.77 | 1556.4  | 2846.4  | 3217.3  |
| 219384_s_at | adenosine deaminase, tRNA-specific 1                                                  | NM_01209 | 23536 16q23 | <b>2141.31</b>  | 1230.87  | -910.44   | 1.24572E-08 | 1.74 | 1799    | 1691.7  | 1625.4  |
| 203644_s_at | KIAA0872 protein                                                                      | AI629033 | 22879 16q23 | <b>1077.56</b>  | 534.28   | -543.28   | 0.000250469 | 2.02 | 1163.1  | 142.6   | 1585.1  |
| 202771_at   | KIAA0233 gene product                                                                 | NM_01474 | 9780 16q24  | <b>2459.15</b>  | 1314.02  | -1145.13  | 0.000162999 | 1.87 | 1962.9  | 1364.7  | 2426.8  |
| 202104_s_at | spastic paraplegia 7, paraplegin (pure and complicated autosomal recessive)           | NM_00311 | 6687 16q24  | <b>1792.44</b>  | 1023.52  | -768.92   | 0.000122766 | 1.75 | 1326.3  | 1188.1  | 1516.6  |
| 214494_s_at | paraplegin or cell matrix adhesion regulator (SPG7)                                   | NM_00520 | 1216 16q24  | <b>2914.23</b>  | 1902.26  | -1011.97  | 0.000586139 | 1.53 | 2144    | 2569.1  | 2530.3  |
| 203219_s_at | adenine phosphoribosyltransferase                                                     | NM_00048 | 353 16q24   | <b>3560.99</b>  | 2330.05  | -1230.94  | 3.44966E-05 | 1.53 | 4680.4  | 2752.1  | 3208.2  |
| 203938_s_at | TATA box binding protein (TBP)-associated factor, RNA polymerase I, C, 110kD          | NM_00567 | 9013 16q24  | <b>1018.95</b>  | 434.01   | -584.95   | 0.000494592 | 2.35 | 350     | 929.3   | 1447    |
| 213036_x_at | ATPase, Ca++ transporting, ubiquitous                                                 | Y15724   | 489 17p13   | <b>5056.52</b>  | 1983.10  | -3073.42  | 1.15652E-05 | 2.55 | 1945.8  | 3807.5  | 6815.5  |
| 219184_x_at | translocase of inner mitochondrial membrane 22 homolog (yeast)                        | NM_01333 | 29928 17p13 | <b>1509.43</b>  | 614.83   | -894.60   | 8.38403E-09 | 2.46 | 1078.1  | 1403.9  | 1495.3  |
| 203871_at   | sentrin/SUMO-specific protease 3                                                      | NM_01567 | 26168 17p13 | <b>1059.61</b>  | 406.91   | -652.71   | 3.80476E-06 | 2.60 | 1862.6  | 464.8   | 1048.3  |
| 218526_s_at | homolog of yeast MOG1                                                                 | NM_01418 | 29098 17p13 | <b>1568.39</b>  | 911.92   | -656.47   | 0.000127288 | 1.72 | 1570.6  | 1627.7  | 1844.6  |
| 204925_at   | cystinosis, nephropathic                                                              | NM_00493 | 1497 17p13  | <b>1023.45</b>  | 634.08   | -389.36   | 0.000201927 | 1.61 | 658.7   | 971.7   | 1097.8  |
| 200000_s_at | PRP8 pre-mRNA processing factor 8 homolog (yeast)                                     | NM_00644 | 10594 17p13 | <b>3224.97</b>  | 2092.31  | -1132.67  | 0.000107744 | 1.54 | 2615.8  | 3171.3  | 4090.6  |
| 207522_s_at | ATPase, Ca++ transporting, ubiquitous                                                 | NM_00517 | 489 17p13   | <b>2541.39</b>  | 1318.79  | -1222.59  | 0.000125933 | 1.93 | 927.5   | 1471.2  | 3288.3  |
| 219435_at   | hypothetical protein FLJ22170                                                         | NM_02509 | 80169 17p13 | <b>1691.87</b>  | 1079.08  | -612.79   | 0.000221387 | 1.57 | 1129.1  | 1263.5  | 1441.4  |
| 218828_at   | phospholipid scramblase 3                                                             | NM_02036 | 57048 17p13 | <b>3868.98</b>  | 1612.28  | -2256.69  | 0.000502174 | 2.40 | 7794.1  | 629.8   | 5294.2  |
| 211300_s_at | tumor protein p53 (Li-Fraumeni syndrome)                                              | K03199   | 7157 17p13  | <b>876.10</b>   | 424.12   | -451.98   | 0.000609195 | 2.07 | 616.5   | 671.9   | 887.2   |
| 201729_s_at | KIAA0100 gene product                                                                 | NM_01468 | 9703 17q11  | <b>3142.98</b>  | 1946.01  | -1196.97  | 0.000618515 | 1.62 | 1810.5  | 1668.1  | 3184.4  |
| 209163_at   | cytochrome b-561                                                                      | AL514271 | 1534 17q11  | <b>1439.45</b>  | 908.52   | -530.93   | 0.000277325 | 1.58 | 1573.3  | 1317.6  | 1507.5  |
| 208831_x_at | suppressor of Ty 6 homolog (S. cerevisiae)                                            | D79984   | 6830 17q11  | <b>826.90</b>   | 295.93   | -530.97   | 0.000620253 | 2.79 | 246.2   | 143.8   | 819     |
| 208991_at   | signal transducer and activator of transcription 3 (acute-phase response factor)      | AA634272 | 6774 17q21  | <b>27432.17</b> | 16069.52 | -11362.65 | 3.11912E-05 | 1.71 | 20651   | 9289.5  | 22003.7 |
| 216836_s_at | v-erb-b2 erythroblastic leukemia viral oncogene homolog 2, neuro/glioblastoma derived | X03363   | 2064 17q21  | <b>479.40</b>   | 229.98   | -249.42   | 0.000140646 | 2.08 | 250.6   | 881.4   | 445.6   |
| 210230_at   | RNA, U2 small nuclear                                                                 | BC003629 | 6066 17q21  | <b>1037.15</b>  | 356.65   | -680.50   | 2.42447E-05 | 2.91 | 291.4   | 977     | 1105.4  |
| 220684_at   | T-box 21 (T-bet)                                                                      | NM_01335 | 30009 17q21 | <b>4275.31</b>  | 2691.73  | -1583.58  | 2.0365E-05  | 1.59 | 4296.3  | 3644.2  | 4074.8  |
| 221554_at   | protein kinase LYK5                                                                   | AF308302 | 92335 17q23 | <b>2208.07</b>  | 1249.74  | -958.33   | 0.000232062 | 1.77 | 1185.4  | 1596.7  | 2813.5  |
| 205297_s_at | CD79B antigen (immunoglobulin-associated beta)                                        | NM_00062 | 974 17q23   | <b>1991.54</b>  | 1287.24  | -704.31   | 0.000430736 | 1.55 | 1406.2  | 1853.9  | 1577.4  |
| 203514_at   | mitogen-activated protein kinase kinase kinase 3                                      | BF971923 | 4215 17q23  | <b>9968.25</b>  | 2725.36  | -7242.89  | 2.56836E-08 | 3.66 | 3686.6  | 2514.3  | 10388.9 |
| 217973_at   | carbonyl reductase                                                                    | NM_01628 | 51181 17q25 | <b>2591.47</b>  | 1313.93  | -1277.55  | 1.09007E-05 | 1.97 | 2914.9  | 1817.4  | 3852.7  |
| 204970_s_at | v-maf musculoaponeurotic fibrosarcoma oncogene homolog G (avian)                      | NM_00235 | 4097 17q25  | <b>1289.57</b>  | 740.05   | -549.52   | 0.000520058 | 1.74 | 1097    | 1645.8  | 814.7   |
| 208657_s_at | MLL septin-like fusion                                                                | AF142408 | 10801 17q25 | <b>1861.36</b>  | 1074.76  | -786.59   | 0.000744162 | 1.73 | 1226.6  | 2168.4  | 2050.5  |
| 219173_at   | <b>hypothetical protein FLJ22686</b>                                                  | NM_02495 | 80022 17q25 | <b>1429.32</b>  | 715.13   | -714.19   | 0.000163063 | 2.00 | 1157.2  | 112.3   | 1268.7  |
| 202812_at   | glucosidase, alpha; acid (Pompe disease, glycogen storage disease type II)            | NM_00015 | 2548 17q25  | <b>2803.28</b>  | 1571.84  | -1231.44  | 0.000187186 | 1.78 | 3653.5  | 1008.2  | 2599.8  |
| 218058_at   | CpG binding protein                                                                   | NM_01459 | 30827 18q12 | <b>1807.27</b>  | 1082.16  | -725.11   | 0.000166356 | 1.67 | 1268.3  | 1257.8  | 1597.7  |

|             |                                                                                  |          |              |                 |          |           |             |      |         |         |         |
|-------------|----------------------------------------------------------------------------------|----------|--------------|-----------------|----------|-----------|-------------|------|---------|---------|---------|
| 213489_at   | microtubule-associated protein, RP/EB family, member 2                           | BE671156 | 10982 18q12  | <b>1334.89</b>  | 655.81   | -679.08   | 0.000355344 | 2.04 | 534.9   | 272.5   | 1578.1  |
| 218913_s_at | Gem-interacting protein (GMIP)                                                   | NM_01657 | 51291 19p11  | <b>2191.96</b>  | 1089.97  | -1101.99  | 2.21101E-05 | 2.01 | 1264.5  | 2392.8  | 3224.7  |
| 213505_s_at | splicing factor, arginine/serine-rich 14, SFRS14                                 | BG252853 | 10147 19p12  | <b>1311.32</b>  | 717.53   | -593.79   | 0.000182815 | 1.83 | 1312    | 1656.6  | 682.1   |
| 206722_s_at | endothelial differentiation, lysophosphatidic acid G-protein-coupled receptor, 4 | NM_00472 | 9170 19p12   | <b>2471.56</b>  | 1558.99  | -912.57   | 0.000250387 | 1.59 | 2029.5  | 1394.1  | 3249.2  |
| 213039_at   | Rho-specific guanine nucleotide exchange factor p114                             | AB011093 | 23370 19p13  | <b>13395.23</b> | 8566.14  | -4829.08  | 3.11007E-06 | 1.56 | 9773.9  | 10428.9 | 18580.7 |
| 221506_s_at | karyopherin beta 2b, transportin                                                 | BG258639 | 30000 19p13  | <b>2275.92</b>  | 1351.09  | -924.83   | 3.67379E-06 | 1.68 | 2907.8  | 2689.4  | 2065.9  |
| 208336_s_at | glycoprotein, synaptic 2                                                         | NM_00486 | 9524 19p13   | <b>1674.74</b>  | 712.65   | -962.08   | 4.25581E-06 | 2.35 | 2368.1  | 981     | 1666.5  |
| 203782_s_at | polymerase (RNA) mitochondrial (DNA directed)                                    | NM_00503 | 5442 19p13   | <b>1703.73</b>  | 1013.69  | -690.04   | 1.27576E-05 | 1.68 | 1905.6  | 2405.9  | 1527.6  |
| 213045_at   | KIAA0561 protein                                                                 | AB011133 | 23031 19p13  | <b>4180.32</b>  | 2596.31  | -1584.01  | 2.63654E-05 | 1.61 | 3814.7  | 2554.6  | 4740.7  |
| 202102_s_at | bromodomain-containing 4                                                         | BF718610 | 23476 19p13  | <b>11075.67</b> | 6770.53  | -4305.14  | 5.26303E-05 | 1.64 | 13179   | 4260.6  | 8845.7  |
| 202574_s_at | casein kinase 1, gamma 2                                                         | NM_00131 | 1455 19p13   | <b>2604.34</b>  | 1303.17  | -1301.17  | 8.0763E-05  | 2.00 | 3045.6  | 1141.3  | 3630.7  |
| 206929_s_at | nuclear factor I/C (CCAAT-binding transcription factor)                          | NM_00559 | 4782 19p13   | <b>1051.56</b>  | 459.89   | -591.67   | 0.000150598 | 2.29 | 1066.4  | 160.3   | 784.5   |
| 210463_x_at | hypothetical protein FLJ20244                                                    | BC002492 | 55621 19p13  | <b>1256.53</b>  | 618.15   | -638.38   | 0.000169002 | 2.03 | 1082.3  | 997.2   | 1331.9  |
| 43977_at    | hypothetical protein FLJ20422                                                    | AI660497 | 54929 19p13  | <b>2199.58</b>  | 1369.61  | -829.97   | 0.000951018 | 1.61 | 3283.8  | 3133.6  | 2261.5  |
| 217804_s_at | hypothetical protein FLJ20011                                                    | BC003086 | 54783 19pter | <b>3241.88</b>  | 1577.26  | -1664.62  | 3.49916E-07 | 2.06 | 3478.4  | 3435.1  | 3009.4  |
| 200094_s_at | eukaryotic translation elongation factor 2                                       | AI004246 | 1938 19pter  | <b>37678.31</b> | 24633.16 | -13045.15 | 0.000221877 | 1.53 | 40996.4 | 28636.1 | 43324.9 |
| 221998_s_at | VRK3 for vaccinia related kinase 3                                               | BF062886 | 51231 19q13  | <b>4300.79</b>  | 2721.53  | -1579.26  | 0.000181748 | 1.58 | 3771.4  | 1619    | 4375    |
| 207740_s_at | nucleoporin 62kD                                                                 | NM_01234 | 23636 19q13  | <b>1288.71</b>  | 470.93   | -817.78   | 2.29564E-10 | 2.74 | 1321.5  | 942.9   | 1050.9  |
| 205182_s_at | zinc finger protein                                                              | NM_01434 | 25799 19q13  | <b>1787.86</b>  | 623.09   | -1164.77  | 2.76382E-06 | 2.87 | 1745.5  | 180.7   | 672.3   |
| 214339_s_at | mitogen-activated protein kinase kinase kinase kinase 1                          | AA744529 | 11184 19q13  | <b>4436.88</b>  | 2419.86  | -2017.02  | 3.12866E-06 | 1.83 | 4954.1  | 3060.3  | 3128.1  |
| 201770_at   | small nuclear ribonucleoprotein polypeptide A                                    | NM_00459 | 6626 19q13   | <b>3561.45</b>  | 2095.21  | -1466.25  | 4.66611E-06 | 1.70 | 3698.1  | 861.8   | 3320.4  |
| 201221_s_at | small nuclear ribonucleoprotein 70kD polypeptide (RNP antigen)                   | NM_00308 | 6625 19q13   | <b>4634.22</b>  | 3030.81  | -1603.42  | 9.22175E-06 | 1.53 | 4594.7  | 4817.2  | 5978.3  |
| 209282_at   | protein kinase D2                                                                | AF309082 | 25865 19q13  | <b>3552.44</b>  | 2066.21  | -1486.23  | 5.52158E-05 | 1.72 | 2916.5  | 2206.7  | 4120.1  |
| 208308_s_at | glucose phosphate isomerase                                                      | NM_00017 | 2821 19q13   | <b>5637.11</b>  | 3515.21  | -2121.90  | 0.000166266 | 1.60 | 6025.9  | 2024.3  | 6326.7  |
| 214907_at   | hypothetical protein R29124_1                                                    | BF110434 | 90273 19q13  | <b>1674.47</b>  | 968.47   | -706.00   | 0.000297971 | 1.73 | 976.1   | 1610.9  | 1907.5  |
| 205861_at   | Spi-B transcription factor (Spi-1/PU.1 related)                                  | NM_00312 | 6689 19q13   | <b>2174.87</b>  | 1270.76  | -904.12   | 0.000343503 | 1.71 | 1645.3  | 507.9   | 1860.3  |
| 202621_at   | interferon regulatory factor 3                                                   | NM_00157 | 3661 19q13   | <b>3264.74</b>  | 2015.18  | -1249.56  | 0.000361377 | 1.62 | 2927.6  | 1847.9  | 4213.5  |
| 204139_x_at | zinc finger protein 42 (myeloid-specific retinoic acid- responsive)              | NM_00342 | 7593 19q13   | <b>868.37</b>   | 444.32   | -424.05   | 0.000495012 | 1.95 | 253.8   | 335     | 915.4   |
| 213915_at   | natural killer cell group 7 sequence                                             | NM_00560 | 4818 19q13   | <b>16013.97</b> | 9075.55  | -6938.42  | 0.000728691 | 1.76 | 27099.1 | 12257.5 | 19509.3 |
| 202726_at   | ligase I, DNA, ATP-dependent                                                     | NM_00023 | 3978 19q13   | <b>1096.96</b>  | 630.67   | -466.28   | 0.000924727 | 1.74 | 683.4   | 2164.5  | 876     |
| 200990_at   | tripartite motif-containing 28                                                   | NM_00576 | 10155 19q13  | <b>3898.12</b>  | 2167.54  | -1730.58  | 0.000101259 | 1.80 | 4551.6  | 1098    | 3964.2  |
| 220948_s_at | ATPase, Na+/K+ transporting, alpha 1 polypeptide                                 | NM_00070 | 476 1p21     | <b>4260.67</b>  | 2486.13  | -1774.54  | 8.95748E-05 | 1.71 | 3586.5  | 2001.8  | 5156    |
| 204263_s_at | carnitine palmitoyltransferase II                                                | M58581   | 1376 1p32    | <b>1029.10</b>  | 289.31   | -739.79   | 1.56061E-06 | 3.56 | 666.7   | 1180.7  | 1655.5  |
| 204731_at   | transforming growth factor, beta receptor III (betaglycan, 300kD)                | NM_00324 | 7049 1p33    | <b>1970.90</b>  | 999.42   | -971.48   | 4.71675E-05 | 1.97 | 2408.8  | 2003.6  | 1322.4  |
| 213798_s_at | adenylyl cyclase-associated protein                                              | AA806142 | 10487 1p34   | <b>39407.80</b> | 22992.82 | -16414.98 | 1.33695E-08 | 1.71 | 33499.7 | 21811.8 | 32945.7 |
| 212103_at   | karyopherin alpha 6 (importin alpha 7)                                           | BG403834 | 23633 1p35   | <b>2056.81</b>  | 941.06   | -1115.75  | 4.86333E-06 | 2.19 | 1208.3  | 1332.4  | 2118.2  |
| 219235_s_at | hypothetical protein FLJ13171                                                    | NM_02392 | 65979 1p35   | <b>1520.68</b>  | 569.46   | -951.22   | 7.61909E-09 | 2.67 | 1214    | 686.7   | 1466    |
| 204891_s_at | lymphocyte-specific protein tyrosine kinase (LCK)                                | NM_00535 | 3932 1p35    | <b>12494.76</b> | 7292.54  | -5202.23  | 5.36542E-06 | 1.71 | 11810.5 | 10347.1 | 11356.7 |
| 219423_x_at | TNFRSF25                                                                         | NM_00379 | 8718 1p36    | <b>1890.59</b>  | 972.63   | -917.97   | 1.84883E-07 | 1.94 | 1325.1  | 2132    | 1602.8  |
| 202178_at   | protein kinase C, zeta                                                           | NM_00274 | 5590 1p36    | <b>2120.71</b>  | 1288.08  | -832.63   | 1.6054E-05  | 1.65 | 1656.8  | 2349.1  | 2875.4  |
| 221790_s_at | LDL receptor adaptor protein                                                     | AL545035 | 26119 1p36   | <b>3676.73</b>  | 2195.16  | -1481.57  | 0.000434582 | 1.67 | 3357.4  | 3260.8  | 1995.9  |
| 202481_at   | short-chain dehydrogenase/reductase 1                                            | NM_00475 | 9249 1p36    | <b>1782.37</b>  | 1143.85  | -638.52   | 0.000677678 | 1.56 | 2305.9  | 907.7   | 1948.2  |
| 205025_at   | GLI-Kruppel family member HKR3                                                   | NM_00534 | 3104 1p36    | <b>1096.91</b>  | 584.37   | -512.54   | 0.000712967 | 1.88 | 791.2   | 44.1    | 1336.4  |
| 219865_at   | HSPC157 protein                                                                  | NM_01417 | 29092 1p36   | <b>1778.71</b>  | 1177.34  | -601.36   | 0.000867841 | 1.51 | 2083.7  | 2278.5  | 2151.4  |
| 204198_s_at | runt-related transcription factor 3, RUNX3                                       | AA541630 | 864 1p36     | <b>7168.09</b>  | 3720.07  | -3448.02  | 1.51716E-06 | 1.93 | 7546.8  | 5843.8  | 6942.8  |
| 218608_at   | putative ATPase                                                                  | NM_02208 | 23400 1p36   | <b>524.13</b>   | 256.48   | -267.65   | 0.00065546  | 2.04 | 550.5   | 122.8   | 888     |
| 215967_s_at | lymphocyte antigen 9                                                             | AL582804 | 4063 1q21    | <b>2155.73</b>  | 1377.46  | -778.27   | 6.53258E-05 | 1.57 | 2106.2  | 1712.6  | 2014.5  |
| 203229_s_at | CDC-like kinase 2                                                                | NM_00399 | 1196 1q21    | <b>3274.61</b>  | 1962.32  | -1312.28  | 1.26349E-05 | 1.67 | 3280.5  | 1793.4  | 3642.6  |
| 210031_at   | CD3Z antigen, zeta polypeptide (TiT3 complex)                                    | J04132   | 919 1q22     | <b>13903.41</b> | 7077.09  | -6826.32  | 6.47456E-07 | 1.96 | 11929.4 | 10369.8 | 13173.6 |
| 202250_s_at | WD repeat domain 42A (WDR42A)                                                    | NM_01572 | 50717 1q22   | <b>1976.98</b>  | 1307.21  | -669.77   | 0.000566177 | 1.51 | 1361.1  | 1163.5  | 2801.8  |
| 205988_at   | CD84 antigen (leukocyte antigen)                                                 | NM_00387 | 8832 1q24    | <b>4434.46</b>  | 2887.02  | -1547.45  | 1.40203E-05 | 1.54 | 3752.7  | 2833.9  | 3301.6  |
| 221601_s_at | regulator of Fas-induced apoptosis, Fas apoptotic inhibitory molecule 3 FAIM3    | AI084226 | 9214 1q32    | <b>13072.28</b> | 8472.66  | -4599.62  | 5.4766E-07  | 1.54 | 11212.3 | 11266.9 | 9606.2  |

|             |                                                                                              |          |             |                 |          |           |             |      |         |         |         |
|-------------|----------------------------------------------------------------------------------------------|----------|-------------|-----------------|----------|-----------|-------------|------|---------|---------|---------|
| 207734_at   | hypothetical protein FLJ20340                                                                | NM_01777 | 54900 1q32  | <b>2561.47</b>  | 1552.86  | -1008.61  | 3.43844E-06 | 1.65 | 2492.8  | 1713.2  | 2034.6  |
| 214833_at   | transmembrane protein 63A, TMEM63A                                                           | AB007958 | 57243 1q42  | <b>2197.91</b>  | 1224.75  | -973.16   | 5.08598E-05 | 1.79 | 904.9   | 1155.6  | 1194.1  |
| 201853_s_at | cell division cycle 25B                                                                      | NM_02187 | 994 20p13   | <b>8988.00</b>  | 5770.62  | -3217.38  | 3.45802E-05 | 1.56 | 5220.1  | 6752.3  | 7222.3  |
| 209026_x_at | FK506 binding protein 1A (12kD)                                                              | AF141349 | 2280 20p13  | <b>9290.43</b>  | 6029.44  | -3260.99  | 0.000153246 | 1.54 | 13283.3 | 3754.6  | 8590.5  |
| 210706_s_at | ring finger protein 24                                                                       | BC000213 | 11237 20p13 | <b>10237.35</b> | 4914.46  | -5322.88  | 1.60725E-06 | 2.08 | 3826.5  | 3579.2  | 8957.9  |
| 209144_s_at | core-binding factor, runt domain, alpha subunit 2; translocated to, 2                        | AI810484 | 9139 20q11  | <b>404.07</b>   | 170.41   | -233.66   | 0.000753068 | 2.37 | 387.7   | 196.3   | 106.1   |
| 201704_at   | ectonucleoside triphosphate diphosphohydrolase 6 (putative function)                         | NM_00124 | 955 20q11   | <b>1417.91</b>  | 825.78   | -592.13   | 2.98541E-05 | 1.72 | 1498.1  | 596     | 1610.2  |
| 212750_at   | protein phosphatase 1, regulatory (inhibitor) subunit 16B                                    | AB020630 | 26051 20q11 | <b>1618.48</b>  | 963.78   | -654.70   | 0.000267292 | 1.68 | 1369.3  | 2103.9  | 1455.2  |
| 217770_at   | CGI-06 protein                                                                               | NM_01593 | 51604 20q12 | <b>2106.82</b>  | 1260.86  | -845.96   | 3.62654E-05 | 1.67 | 1263.7  | 1928.3  | 2550.1  |
| 202789_at   | phospholipase C, gamma 1 (formerly subtype 148), PLCG1                                       | AL022394 | 5335 20q12  | <b>2207.17</b>  | 1276.25  | -930.93   | 5.58447E-05 | 1.73 | 2012.1  | 3820.5  | 568.1   |
| 209048_s_at | protein kinase C binding protein 1                                                           | AB032951 | 23613 20q13 | <b>2490.32</b>  | 1408.96  | -1081.36  | 1.96708E-09 | 1.77 | 2395.2  | 1774.2  | 1480.6  |
| 218494_s_at | GLUT4 enhancer factor                                                                        | NM_02006 | 56731 20q13 | <b>1468.46</b>  | 783.82   | -684.64   | 0.000117993 | 1.87 | 1370.8  | 1677.4  | 1450.2  |
| 208880_s_at | putative mitochondrial outer membrane protein import receptor                                | AB019219 | 24148 20q13 | <b>3002.42</b>  | 1842.13  | -1160.29  | 0.000176694 | 1.63 | 4472.2  | 2953    | 1682.3  |
| 218533_s_at | hypothetical protein FLJ20517                                                                | NM_01785 | 54963 20q13 | <b>760.49</b>   | 390.36   | -370.13   | 0.000787465 | 1.95 | 586.5   | 1225.2  | 621.8   |
| 209042_s_at | ubiquitin-conjugating enzyme E2G 2 (UBC7 homolog, yeast)                                     | BC001738 | 7327 21q22  | <b>2243.79</b>  | 740.21   | -1503.59  | 2.34613E-09 | 3.03 | 2135.3  | 2284.4  | 1643.4  |
| 220918_at   | hypothetical protein FLJ20856                                                                | NM_02514 | 80215 21q22 | <b>4892.77</b>  | 2205.66  | -2687.11  | 6.85673E-07 | 2.22 | 2656.3  | 2483.9  | 3444.4  |
| 202217_at   | ES1 (zebrafish) protein, human homolog of                                                    | NM_00464 | 8209 21q22  | <b>4489.32</b>  | 2901.46  | -1587.86  | 2.80467E-06 | 1.55 | 4024.5  | 5037.1  | 6141.8  |
| 203660_s_at | pericentrin 2 (kendrin)                                                                      | NM_00603 | 5116 21q22  | <b>1994.98</b>  | 1328.94  | -666.04   | 0.000281865 | 1.50 | 1722.3  | 1663.9  | 1566    |
| 213408_s_at | phosphatidylinositol 4-kinase, catalytic, alpha polypeptide                                  | AK024034 | 5297 22q11  | <b>5419.34</b>  | 3133.67  | -2285.67  | 6.87213E-07 | 1.73 | 3868.3  | 3403.9  | 4994.5  |
| 202624_s_at | calcineurin binding protein 1, CABIN1                                                        | NM_01229 | 23523 22q11 | <b>3881.08</b>  | 2348.05  | -1533.04  | 0.000423192 | 1.65 | 4362.9  | 2992.8  | 3425.9  |
| 208024_s_at | DiGeorge syndrome critical region gene 6                                                     | NM_00567 | 8214 22q11  | <b>2207.15</b>  | 1455.07  | -752.08   | 0.000586466 | 1.52 | 1971.3  | 1088.7  | 2013.5  |
| 217497_at   | endothelial cell growth factor 1 (platelet-derived)                                          | AW613387 | 1890 22q13  | <b>3111.95</b>  | 1280.62  | -1831.34  | 5.12583E-06 | 2.43 | 2116.5  | 1698.5  | 2851.9  |
| 213579_s_at | E1A binding protein p300                                                                     | AI459462 | 2033 22q13  | <b>2527.84</b>  | 1284.63  | -1243.21  | 6.15501E-08 | 1.97 | 1150.1  | 1748.1  | 1719.2  |
| 204193_at   | choline kinase-like                                                                          | NM_00519 | 1120 22q13  | <b>3664.56</b>  | 2271.21  | -1393.35  | 1.32581E-05 | 1.61 | 2479.8  | 3637.6  | 3443.3  |
| 212682_s_at | hypothetical protein BC002942                                                                | AI081535 | 91289 22q13 | <b>1599.85</b>  | 658.27   | -941.58   | 9.13476E-05 | 2.43 | 637.8   | 426.2   | 1734.8  |
| 204008_at   | dynein, axonemal, light polypeptide 4                                                        | NM_00574 | 10126 22q13 | <b>776.62</b>   | 471.72   | -304.89   | 0.000170345 | 1.65 | 730.8   | 679.4   | 867     |
| 205291_at   | interleukin 2 receptor, beta                                                                 | NM_00087 | 3560 22q13  | <b>11609.94</b> | 6515.04  | -5094.89  | 0.000315863 | 1.78 | 8036    | 6777.3  | 8506    |
| 201755_at   | MCM5 minichromosome maintenance deficient 5, cell division cycle 46 (S. cerevisiae)          | NM_00673 | 4174 22q13  | <b>1146.18</b>  | 645.93   | -500.25   | 0.000464999 | 1.77 | 1861.9  | 97.3    | 1257.5  |
| 39835_at    | SET binding factor 1                                                                         | U93181   | 6305 22q13  | <b>1230.35</b>  | 686.99   | -543.36   | 0.00095242  | 1.79 | 1211.9  | 670.3   | 1556.1  |
| 212040_at   | trans-golgi network protein 2                                                                | BG249599 | 10618 2p11  | <b>3616.76</b>  | 2052.39  | -1564.36  | 6.18492E-05 | 1.76 | 2753.5  | 2798.5  | 3298.5  |
| 221671_x_at | immunoglobulin kappa constant                                                                | M63438   | 3514 2p12   | <b>45808.52</b> | 23671.46 | -22137.06 | 7.65207E-06 | 1.94 | 43425.6 | 23507.7 | 41159.5 |
| 206036_s_at | v-rel reticuloendotheliosis viral oncogene homolog (avian)                                   | NM_00290 | 5966 2p13   | <b>1491.20</b>  | 892.84   | -598.36   | 3.03971E-05 | 1.67 | 1655    | 1040.1  | 1447.1  |
| 201082_s_at | dynactin 1 (p150, glued homolog, Drosophila)                                                 | NM_00408 | 1639 2p13   | <b>1203.40</b>  | 717.34   | -486.06   | 0.00043947  | 1.68 | 697.2   | 456.7   | 1483.2  |
| 212071_s_at | spectrin, beta, non-erythrocytic 1 (barbed-end actin filament capping), SPTBN1               | BE968833 | 6711 2p21   | <b>5333.96</b>  | 3390.97  | -1942.99  | 0.000101961 | 1.57 | 3861.5  | 3251.9  | 5620.1  |
| 212645_x_at | brain and reproductive organ-expressed (TNFRSF1A modulator)                                  | AL566299 | 9577 2p23   | <b>1770.85</b>  | 1082.30  | -688.55   | 0.000114657 | 1.64 | 1099.3  | 1797.3  | 2579.8  |
| 210249_s_at | nuclear receptor coactivator 1                                                               | U59302   | 8648 2p23   | <b>13397.93</b> | 8351.06  | -5046.87  | 5.36895E-05 | 1.60 | 10349.2 | 5126.8  | 11061.2 |
| 212274_at   | lipin 1                                                                                      | AV705559 | 23175 2p25  | <b>2360.67</b>  | 1175.61  | -1185.06  | 0.000115052 | 2.01 | 1064.8  | 3596.9  | 1680.3  |
| 214032_at   | zeta-chain (TCR) associated protein kinase (70 kD)                                           | AI817942 | 7535 2q12   | <b>2924.46</b>  | 1613.97  | -1310.49  | 4.26213E-07 | 1.81 | 2541.5  | 4260.5  | 2652.4  |
| 212752_at   | CLIP-associating protein 1                                                                   | AA176798 | 23332 2q14  | <b>1644.55</b>  | 1075.33  | -569.22   | 0.000276933 | 1.53 | 889.2   | 1377.1  | 1602.5  |
| 201937_s_at | aspartyl aminopeptidase                                                                      | NM_01210 | 23549 2q36  | <b>724.26</b>   | 262.73   | -461.54   | 0.000387003 | 2.76 | 449.7   | 358.9   | 1087.7  |
| 212280_x_at | ATG4 autophagy related 4 homolog B (S. cerevisiae), ATG4B - KIAA0943 protein                 | AA532726 | 23192 2q37  | <b>2157.68</b>  | 1399.95  | -757.73   | 0.000722711 | 1.54 | 2443    | 1117.6  | 2055.3  |
| 202208_s_at | ADP-ribosylation factor-like 7                                                               | BC001051 | 10123 2q37  | <b>5813.04</b>  | 2799.65  | -3013.39  | 9.36618E-09 | 2.08 | 5743.1  | 4443.7  | 4281.8  |
| 219997_s_at | COP9 (constitutive photomorphogenic, Arabidopsis, homolog) subunit 7B                        | NM_02273 | 64708 2q37  | <b>1722.63</b>  | 1084.84  | -637.79   | 9.84915E-06 | 1.59 | 1390.2  | 1577.1  | 1680.5  |
| 221548_s_at | integrin-linked kinase-associated serine/threonine phosphatase 2C                            | AY024365 | 80895 2q37  | <b>1531.84</b>  | 978.41   | -553.43   | 3.4268E-05  | 1.57 | 1250.9  | 1057.6  | 1498.3  |
| 221934_s_at | DALR anticodon binding domain containing 3, DALRD3                                           | BF941492 | 55152 3p21  | <b>3313.04</b>  | 2066.04  | -1247.00  | 2.88096E-05 | 1.60 | 2295.7  | 1955.5  | 3043.1  |
| 201040_at   | guanine nucleotide binding protein (G protein), alpha inhibiting activity polypeptide 2 (G1) | NM_00207 | 2771 3p21   | <b>13325.14</b> | 5815.91  | -7509.23  | 2.53759E-06 | 2.29 | 10194   | 4189    | 18122.4 |
| 203281_s_at | ubiquitin-activating enzyme E1-like                                                          | NM_00333 | 7318 3p21   | <b>4071.51</b>  | 2517.64  | -1553.86  | 0.000424629 | 1.62 | 2927.5  | 1978.6  | 6743.2  |
| 204346_s_at | Ras association (RalGDS/AF-6) domain family 1                                                | NM_00718 | 11186 3p21  | <b>2902.84</b>  | 1643.79  | -1259.05  | 7.98554E-07 | 1.77 | 1407.2  | 3004.2  | 4376.4  |
| 204355_at   | DEAD/H (Asp-Glu-Ala-Asp/His) box polypeptide 30                                              | NM_01496 | 22907 3p21  | <b>1974.74</b>  | 1000.55  | -974.19   | 6.41031E-06 | 1.97 | 1969.1  | 856.1   | 2483.1  |
| 205875_s_at | three prime repair exonuclease 1                                                             | NM_01638 | 11277 3p21  | <b>2763.69</b>  | 1311.53  | -1452.17  | 0.000426427 | 2.11 | 2115.7  | 514.3   | 3683.1  |
| 209950_s_at | villin-like (actin bundling)                                                                 | BC004300 | 50853 3p21  | <b>595.09</b>   | 312.55   | -282.54   | 0.000533727 | 1.90 | 132.7   | 718.3   | 675.9   |
| 203246_s_at | homologous to yeast nitrogen permease (candidate tumor suppressor)                           | NM_00654 | 10641 3p21  | <b>2503.97</b>  | 1217.42  | -1286.55  | 0.000697322 | 2.06 | 913.7   | 1267.5  | 2866.1  |

|             |                                                                                    |                   |             |                 |          |           |             |      |         |         |         |
|-------------|------------------------------------------------------------------------------------|-------------------|-------------|-----------------|----------|-----------|-------------|------|---------|---------|---------|
| 217817_at   | actin related protein 2/3 complex, subunit 4 (20 kD)                               | BE891920          | 10093 3p25  | <b>5677.56</b>  | 2259.06  | -3418.50  | 3.42349E-06 | 2.51 | 5283.5  | 3419.7  | 7940.6  |
| 203906_at   | KIAA0763 gene product                                                              | AI652645          | 9922 3p25   | <b>5602.08</b>  | 3435.18  | -2166.90  | 0.000227741 | 1.63 | 3691.1  | 3159    | 7796.8  |
| 214739_at   | hypothetical protein MGC4126                                                       | AI357539          | 84859 3q29  | <b>955.42</b>   | 607.85   | -347.57   | 0.00074771  | 1.57 | 601.1   | 1570.5  | 947     |
| 208021_s_at | transcription regulation of transcription)                                         | NM_00291          | 5981 4p14   | <b>1254.89</b>  | 819.37   | -435.52   | 0.00050463  | 1.53 | 1211    | 1106.7  | 1074.1  |
| 210137_s_at | dCMP deaminase                                                                     | BC001286          | 1635 4q35   | <b>2347.53</b>  | 1365.12  | -982.41   | 7.54476E-06 | 1.72 | 1962.6  | 1375.8  | 3103.8  |
| 222152_at   | Programmed cell death 6 (PDCD6)                                                    | AK024175          | 10016 5pter | <b>2057.41</b>  | 1092.06  | -965.35   | 0.000137832 | 1.88 | 979.5   | 1621.4  | 1006.8  |
| 202531_at   | interferon regulatory factor 1                                                     | NM_00219          | 3659 5q31   | <b>14403.07</b> | 9407.78  | -4995.29  | 1.33441E-05 | 1.53 | 12635   | 8860.9  | 19191.9 |
| 205254_x_at | transcription factor 7 (T-cell specific, HMG-box)                                  | AW027359          | 6932 5q31   | <b>1963.48</b>  | 976.09   | -987.39   | 2.82568E-05 | 2.01 | 867     | 729.2   | 1509.3  |
| 212193_s_at | KIAA0731 protein                                                                   | BE881529          | 23367 5q33  | <b>1700.56</b>  | 634.32   | -1066.24  | 1.73971E-07 | 2.68 | 768.6   | 406.1   | 1266.8  |
| 40420_at    | serine/threonine kinase 10                                                         | AB015718          | 6793 5q35   | <b>9149.38</b>  | 5758.27  | -3391.12  | 2.5456E-05  | 1.59 | 7053.3  | 5880.6  | 10253.5 |
| 212605_s_at | AF034176 Human mRNA (Tripodis and Ragoussis) Homo sapiens cDNA clone ntcon5 c      | AK025759 AK025759 | 6p21        | <b>2014.16</b>  | 937.81   | -1076.36  | 3.9005E-07  | 2.15 | 1630    | 1852.1  | 1901.4  |
| 200905_x_at | major histocompatibility complex, class I, E                                       | NM_00551          | 3133 6p21   | <b>98505.23</b> | 63128.26 | -35376.97 | 3.40127E-08 | 1.56 | 88149.3 | 89402.3 | 96804.8 |
| 200041_s_at | HLA-B associated transcript 1                                                      | NM_00464          | 7919 6p21   | <b>16317.91</b> | 9742.19  | -6575.71  | 3.35984E-05 | 1.67 | 11192.6 | 7660.5  | 20030   |
| 203146_s_at | gamma-aminobutyric acid (GABA) B receptor, 1                                       | NM_00147          | 2550 6p21   | <b>2303.58</b>  | 1361.92  | -941.66   | 9.2316E-05  | 1.69 | 1646.7  | 1105.7  | 1873.7  |
| 207169_x_at | discoidin domain receptor family, member 1                                         | NM_00195          | 780 6p21    | <b>763.95</b>   | 443.14   | -320.81   | 0.000166598 | 1.72 | 979.4   | 766.2   | 457.2   |
| 212671_s_at | major histocompatibility complex, class II, DQ alpha 1                             | BG397856          | 3117 6p21   | <b>12018.31</b> | 6005.98  | -6012.33  | 0.000449149 | 2.00 | 18088.9 | 4242.9  | 16708   |
| 201797_s_at | valyl-tRNA synthetase 2                                                            | NM_00629          | 7407 6p21   | <b>427.57</b>   | 187.95   | -239.62   | 0.00045514  | 2.27 | 483.2   | 62.7    | 519.2   |
| 204265_s_at | chromosome 6 open reading frame 9                                                  | NM_02210          | 63940 6p21  | <b>18681.22</b> | 10588.76 | -8092.45  | 0.00046363  | 1.76 | 26466.5 | 6348.2  | 18247.3 |
| 217478_s_at | major histocompatibility complex, class II, DM alpha                               | X76775            | 3108 6p21   | <b>10318.13</b> | 6835.93  | -3482.21  | 0.000800624 | 1.51 | 9596.3  | 3825.6  | 15020.9 |
| 221866_at   | transcription factor EB                                                            | AL035588          | 7942 6p21   | <b>2056.25</b>  | 1262.29  | -793.96   | 0.000390188 | 1.63 | 2182.9  | 1553.8  | 1975.9  |
| 201700_at   | cyclin D3                                                                          | NM_00176          | 896 6p21    | <b>20631.00</b> | 13226.92 | -7404.08  | 2.98559E-05 | 1.56 | 16174.9 | 14920.8 | 25299.6 |
| 201189_s_at | inositol 1,4,5-triphosphate receptor, type 3                                       | NM_00222          | 3710 6p21   | <b>1934.41</b>  | 961.12   | -973.29   | 9.05612E-05 | 2.01 | 1683.9  | 146.9   | 1615.4  |
| 212118_at   | ret finger protein                                                                 | AL523814          | 5987 6p22   | <b>4764.13</b>  | 3130.88  | -1633.24  | 0.000267267 | 1.52 | 6331.9  | 3047.2  | 4446.4  |
| 208622_s_at | villin 2 (ezrin)                                                                   | AA670344          | 7430 6q25   | <b>2515.68</b>  | 1148.03  | -1367.65  | 7.47928E-05 | 2.19 | 1250    | 392     | 1984.3  |
| 221073_s_at | caspase recruitment domain 4 (CARD4 or NOD1)                                       | NM_00609          | 10392 7p15  | <b>2841.76</b>  | 1795.15  | -1046.62  | 4.40718E-05 | 1.58 | 3323    | 1752.5  | 2707    |
| 216899_s_at | src family associated phosphoprotein 2 (SCAP2)                                     | AC003999          | 8935 7p21   | <b>4137.27</b>  | 2323.79  | -1813.48  | 0.000555963 | 1.78 | 3243    | 1194.2  | 4242.4  |
| 212212_s_at | DKFZP586J0619 protein                                                              | BF055496          | 26173 7p22  | <b>1542.03</b>  | 997.02   | -545.01   | 0.000211435 | 1.55 | 1237.7  | 2545.9  | 1282    |
| 218425_at   | TRIAD3 protein                                                                     | BC000787          | 54476 7p22  | <b>2061.71</b>  | 1354.61  | -707.10   | 0.000363666 | 1.52 | 2918.6  | 1867.1  | 1198.9  |
| 203802_x_at | NOL1R protein                                                                      | NM_01804          | 55695 7q11  | <b>2734.32</b>  | 1363.16  | -1371.16  | 0.000196783 | 2.01 | 287.5   | 901.7   | 3207.3  |
| 211031_s_at | cytoplasmic linker 2                                                               | BC006259          | 7461 7q11   | <b>517.36</b>   | 225.93   | -291.43   | 0.000268425 | 2.29 | 693.4   | 644.4   | 434     |
| 221191_at   | DKFZp434A0131 protein                                                              | NM_01899          | 54441 7q11  | <b>1105.16</b>  | 627.39   | -477.77   | 0.000309327 | 1.76 | 313.3   | 653.6   | 698.4   |
| 217529_at   | hypothetical LOC401394/hypothetical LOC402578                                      | BE547674          | 401394 7q22 | <b>1084.64</b>  | 704.65   | -379.99   | 0.000748217 | 1.54 | 1099.2  | 855.2   | 1002    |
| 220954_s_at | paired immunoglobulin-like receptor beta                                           | NM_01344          | 29990 7q22  | <b>2005.49</b>  | 1247.89  | -757.60   | 5.57503E-05 | 1.61 | 1174.8  | 1435.4  | 2023.4  |
| 213444_at   | KIAA0543 protein                                                                   | AB011115          | 23145 7q36  | <b>1661.37</b>  | 582.51   | -1078.87  | 5.63034E-05 | 2.85 | 377.1   | 260.9   | 1775.7  |
| 217437_s_at | transforming, acidic coiled-coil containing protein 1                              | AB029026          | 6867 8p11   | <b>1582.20</b>  | 890.08   | -692.12   | 7.86993E-06 | 1.78 | 1379.3  | 1217.5  | 2137.2  |
| 209342_s_at | inhibitor of kappa light polypeptide gene enhancer in B-cells, kinase beta (IKBKB) | AF080158          | 3551 8p11   | <b>1404.94</b>  | 887.24   | -517.70   | 0.000124645 | 1.58 | 969.1   | 631.1   | 1075.4  |
| 206255_at   | B lymphoid tyrosine kinase, BLK                                                    | NM_00171          | 640 8p23    | <b>753.22</b>   | 207.33   | -545.88   | 1.23361E-07 | 3.63 | 758.2   | 856.8   | 684.1   |
| 215874_at   | ST3 beta-galactoside alpha-2,3-sialyltransferase 1                                 | AK026820          | 6482 8q24   | <b>807.80</b>   | 425.62   | -382.18   | 0.000357192 | 1.90 | 885.5   | 1810.4  | 411.9   |
| 208322_s_at | sialyltransferase 4A (beta-galactosidase alpha-2,3-sialyltransferase)              | NM_00309          | 6482 8q24   | <b>1380.48</b>  | 489.67   | -890.81   | 1.05133E-06 | 2.82 | 934.1   | 1157.2  | 1330    |
| 201639_s_at | cleavage and polyadenylation specific factor 1, 160kD subunit                      | NM_01329          | 29894 8q24  | <b>2153.25</b>  | 1146.92  | -1006.33  | 2.64714E-06 | 1.88 | 2440.8  | 940.9   | 2524.6  |
| 204773_at   | interleukin 11 receptor, alpha                                                     | NM_00451          | 3590 9p13   | <b>1684.05</b>  | 1052.81  | -631.24   | 0.000179772 | 1.60 | 1194.5  | 1215.2  | 1533.5  |
| 215925_s_at | CD72 antigen                                                                       | AF283777          | 971 9p13    | <b>1197.51</b>  | 679.37   | -518.13   | 0.000378212 | 1.76 | 975.6   | 925.5   | 906.8   |
| 209432_s_at | cAMP responsive element binding protein 3 (luman)                                  | AF029674          | 10488 9pter | <b>1545.39</b>  | 935.79   | -609.60   | 7.22393E-05 | 1.65 | 1797.4  | 1059.2  | 1786.8  |
| 207540_s_at | spleen tyrosine kinase, SYK                                                        | NM_00317          | 6850 9q22   | <b>7254.79</b>  | 3851.60  | -3403.19  | 3.41971E-05 | 1.88 | 3312    | 2724.1  | 6922.5  |
| 203147_s_at | tripartite motif-containing 14                                                     | BE962483          | 9830 9q22   | <b>3163.69</b>  | 1696.01  | -1467.68  | 0.000236294 | 1.87 | 1505.3  | 4256.7  | 2102.1  |
| 218555_at   | anaphase-promoting complex subunit 2 (ANAPC2)                                      | NM_01336          | 29882 9q34  | <b>1395.85</b>  | 827.77   | -568.08   | 0.000835778 | 1.69 | 884.7   | 567.1   | 1407.4  |
| 203198_at   | cyclin-dependent kinase 9 (CDC2-related kinase), (CDK9)                            | NM_00126          | 1025 9q34   | <b>1233.65</b>  | 660.32   | -573.33   | 0.000103141 | 1.87 | 193.1   | 895.8   | 1460.8  |
| 202123_s_at | v-abl Abelson murine leukemia viral oncogene homolog 1                             | NM_00515          | 25 9q34     | <b>1506.52</b>  | 996.45   | -510.07   | 0.000262415 | 1.51 | 1421.8  | 964.9   | 1306.2  |
| 208723_at   | ubiquitin specific protease 11                                                     | BC000350          | 8237 Xp21   | <b>3558.94</b>  | 1886.54  | -1672.41  | 3.3838E-08  | 1.89 | 2507.9  | 2812.8  | 3407.2  |
| 209439_s_at | phosphorylase kinase, alpha 2 (liver)                                              | D38616            | 5256 Xp22   | <b>3165.22</b>  | 2099.45  | -1065.77  | 3.09546E-05 | 1.51 | 1733.7  | 1455.4  | 2770    |
| 208806_at   | chromodomain helicase DNA binding protein 3                                        | BE379542          | 1107 Xq13   | <b>1652.78</b>  | 1030.54  | -622.24   | 1.68398E-05 | 1.60 | 1461.9  | 979.5   | 1700.2  |



| NP4     | NP5     | NP6     | NP7     | NP8     | NP9     | NP10    | NP11    | NP12    | NP13    | NP14    | NP15    | NP16    | NP17    | NP18    | NP19    | PSA1    | PSA2    | PSA3    | PSA4    | PSA5    | PSA6   |
|---------|---------|---------|---------|---------|---------|---------|---------|---------|---------|---------|---------|---------|---------|---------|---------|---------|---------|---------|---------|---------|--------|
| 2849.7  | 4489.6  | 4970.6  | 3331.1  | 4813.2  | 4682    | 5684.5  | 2849.5  | 4942.7  | 3192.4  | 4038.8  | 4276.9  | 3007.2  | 2672.8  | 3294.6  | 3364.4  | 2672.8  | 2233.4  | 2158.2  | 1482    | 2196.2  | 3305.5 |
| 555.3   | 1088.7  | 1089    | 1203.6  | 696.9   | 1215.5  | 1539.6  | 1202    | 1608.3  | 947.6   | 1431.8  | 748.3   | 613.5   | 956.7   | 1120.6  | 424.5   | 370     | 374.4   | 305.4   | 1175.8  | 475.6   | 567.7  |
| 3014.9  | 3643.2  | 2229.7  | 3315.7  | 4146.2  | 2637.5  | 3381.5  | 3611.5  | 2899.3  | 2262.2  | 4437.4  | 3114.8  | 4314.2  | 3253.5  | 2822.7  | 3413.8  | 2786.6  | 2520.3  | 1941.6  | 2104    | 2866.7  | 2125.9 |
| 2908.6  | 3366.9  | 3731.8  | 1719.7  | 1963.1  | 1640.4  | 3493.4  | 2293.7  | 3359.2  | 1899.4  | 2283.8  | 2715.8  | 2151.8  | 3027.7  | 2365    | 3080    | 1575.5  | 1525.6  | 1279.5  | 702.2   | 2300.6  | 2671.1 |
| 25358.9 | 16731   | 25885.4 | 24570.3 | 25522.6 | 24052.1 | 28128.6 | 11404   | 13027.1 | 23674.9 | 30507.8 | 15946.7 | 30797.2 | 15120.9 | 18063.9 | 25867.7 | 11745.7 | 16299.5 | 2893.2  | 13041.7 | 25836.1 | 7399.9 |
| 1885.4  | 1992    | 1939.3  | 1084.7  | 1632.1  | 1242.4  | 724.7   | 795.6   | 1209.7  | 1875.8  | 2649.2  | 2655.6  | 2840.9  | 1914.8  | 1289.9  | 1410.9  | 1023.9  | 202.8   | 340.8   | 738.5   | 852.6   | 837    |
| 2983.5  | 4942.5  | 4304.5  | 3381.3  | 4762.5  | 3482.2  | 3425.3  | 3992.6  | 5134.6  | 3575.9  | 3105.5  | 3580.9  | 4737.6  | 3470    | 4158.3  | 3911.1  | 2560.6  | 1983    | 2192.2  | 4047.1  | 3293.5  | 2643.7 |
| 8196.7  | 8017.6  | 8405.4  | 9482.9  | 8755.8  | 8590.6  | 6931.7  | 5583.6  | 9553.8  | 10092.3 | 7020.6  | 6733    | 6284.4  | 6449.1  | 6297    | 9560.8  | 4282.2  | 2911    | 6066.1  | 3698    | 3079.7  | 3702.6 |
| 4065.4  | 5086.9  | 5161.7  | 3006.1  | 4918.3  | 4530.8  | 3884.3  | 3143.8  | 4395.9  | 5439.9  | 3684.3  | 4629.2  | 4161.5  | 4262.5  | 2642.9  | 4471.7  | 2403.8  | 1868.9  | 1595.3  | 1820.4  | 1828.4  | 1972.1 |
| 7668.6  | 7609.4  | 6066.6  | 8266.7  | 5803.6  | 4488.4  | 7756.9  | 5374.8  | 9640    | 5927.8  | 9509.7  | 8038.6  | 6623.8  | 7383.1  | 5031.6  | 4523.3  | 5974.6  | 3896.8  | 2780.3  | 4193.3  | 5078    | 5310.5 |
| 2042.8  | 3581.8  | 2355.8  | 2521.3  | 2732.8  | 2372.3  | 2487.7  | 1345.5  | 4145.3  | 2590.4  | 2077.3  | 3240.7  | 2221    | 1830.1  | 1214.7  | 1916.7  | 1924.3  | 1093.4  | 1123.9  | 2263.6  | 918.8   | 1078.9 |
| 3235.6  | 3637.1  | 4155.8  | 1607.5  | 1088.8  | 1787.9  | 2032.1  | 941.6   | 3877.1  | 1280.1  | 3417.5  | 2782.4  | 1847.8  | 2788.4  | 2107.1  | 2752    | 1419.9  | 1203.6  | 802.4   | 1362.2  | 2117.7  | 698.7  |
| 2783.1  | 2161.9  | 2234.6  | 2133.3  | 2204.1  | 1260.9  | 2032.3  | 1770.6  | 2857.7  | 1761.5  | 3236.8  | 2386.9  | 2983.7  | 1996.9  | 2208    | 2562.3  | 1622.9  | 1427.1  | 2338.2  | 1873.7  | 1651.7  | 1411.9 |
| 2059.4  | 2028.4  | 1580.1  | 159.2   | 1508.1  | 1106.5  | 1123    | 974.2   | 1747.3  | 1138.9  | 100.9   | 1050.5  | 1325.5  | 912.8   | 1183.9  | 717.5   | 165.7   | 100.1   | 448.3   | 117.5   | 88.2    | 314.1  |
| 4656.7  | 5277.9  | 3820.7  | 3815.8  | 4425.1  | 3509.7  | 3068.6  | 4098.4  | 4863.2  | 3605.5  | 2224.8  | 3970.6  | 5226.2  | 4881    | 5526.8  | 4286.2  | 2900.2  | 2743.2  | 3082.2  | 3601.5  | 3473.2  | 3236.5 |
| 5399.7  | 6823.4  | 6983.6  | 4644.1  | 6828.8  | 5270.8  | 7726    | 6691.1  | 7323.5  | 4450    | 6565.7  | 7061.7  | 4894.1  | 6230.1  | 4284.5  | 8088    | 4934    | 3230.6  | 3599.1  | 3033.5  | 4349.6  | 4903.3 |
| 5271.6  | 6281.9  | 6979.1  | 4976.1  | 7345    | 5015.4  | 5077.3  | 5125.4  | 7780.2  | 5433.4  | 5593.7  | 4282.2  | 5577.5  | 5000.4  | 4688.7  | 4609.2  | 4083.3  | 3957.6  | 2871.9  | 4189.8  | 3677.7  | 5907.2 |
| 1056.9  | 1059.5  | 2005.5  | 1757.4  | 1357.7  | 1835    | 2004.7  | 681.7   | 1992.9  | 1370.9  | 1434.8  | 1362.1  | 905.5   | 792.1   | 456.8   | 1154.8  | 367.4   | 1137.6  | 590.2   | 428.5   | 442.6   | 1161.6 |
| 6627.7  | 5231    | 8659.5  | 4881.1  | 7634.7  | 5022.7  | 4310    | 5947.3  | 6971.5  | 5056.2  | 8121.3  | 4841.8  | 9536.7  | 4800.7  | 5361.4  | 8693    | 4606.2  | 4424    | 2446.9  | 6443.8  | 7584.3  | 4287.5 |
| 4182.7  | 3844    | 3825.9  | 3727.9  | 3949.7  | 2390.7  | 3755.3  | 2329.1  | 6223    | 2163.4  | 4339.3  | 4932.5  | 3055.4  | 5009.3  | 2632.6  | 2644.7  | 3184.3  | 2670.6  | 2576.2  | 2144.2  | 3467.9  | 3784.6 |
| 7283.2  | 6837.5  | 8518.1  | 9242.5  | 10777.8 | 7921.8  | 8875.2  | 6970.9  | 9360.2  | 7394.5  | 9473.5  | 6500.2  | 6632.4  | 6211.8  | 5283.6  | 7513.2  | 4702.2  | 4058.3  | 2626.8  | 5596.8  | 4336.2  | 4551.7 |
| 5917.6  | 6587.3  | 6854.1  | 2788    | 5257.5  | 3215.5  | 4737    | 4155.5  | 5835.9  | 4707.1  | 5541.3  | 6586.7  | 3323.2  | 6085.9  | 3526.3  | 5265.7  | 2951.2  | 2604.8  | 2139.3  | 3718.8  | 2721.2  | 3941.4 |
| 1197.6  | 1673.4  | 1487.4  | 1514.1  | 1493.9  | 1374    | 1355.2  | 1336    | 1855.7  | 1146.8  | 2308.7  | 1958.2  | 1041.5  | 1830.6  | 1425.6  | 1942.2  | 1635.5  | 939     | 1143.4  | 922.4   | 851     | 1237.6 |
| 3001.2  | 4021.5  | 5332.5  | 4456    | 4726.7  | 6101    | 5575    | 4135.1  | 6644.8  | 4306.8  | 4624.5  | 5641.7  | 4584.6  | 4028    | 3690    | 3846.7  | 5933.8  | 2973.9  | 1320.3  | 2205.4  | 2360.4  | 3012.9 |
| 1477.1  | 2167.1  | 2076.8  | 1858.8  | 1476.1  | 1067.7  | 1853.1  | 1614.7  | 3304.2  | 1444.1  | 1496.3  | 1707.2  | 1118.9  | 1354.2  | 1138.6  | 1413.2  | 1723.6  | 705.4   | 185.4   | 1146.1  | 838     | 1117.6 |
| 1508.4  | 1729.5  | 1165.1  | 2038.3  | 699.5   | 1639.1  | 1757.9  | 928.1   | 2479.9  | 1377.2  | 1444.2  | 2025.7  | 1395    | 1970.4  | 767.3   | 1104.7  | 1237.4  | 471.5   | 883.5   | 1179.9  | 242.4   | 604.4  |
| 2477.9  | 3049.1  | 1508.4  | 2543.6  | 2266    | 1446.2  | 1612.3  | 1249.7  | 1823.6  | 2434.8  | 2371.2  | 2507.5  | 2451.6  | 2078.2  | 1893    | 3055.5  | 1365.3  | 915     | 1649.6  | 1349.3  | 1298.7  | 1250.3 |
| 522.2   | 1721.2  | 1440.6  | 662.1   | 1482.4  | 542.2   | 1262.5  | 1265.5  | 1290.4  | 1592.9  | 1069.9  | 1177.2  | 1199.5  | 1218.9  | 163.7   | 1085.8  | 919.6   | 378.2   | 133.4   | 293.4   | 155.7   | 195.7  |
| 14482.9 | 14405.5 | 13765.9 | 15339.7 | 16470.9 | 14932.7 | 15693.9 | 15005.8 | 17853.7 | 15822.8 | 13824.7 | 12966.6 | 17061   | 15288   | 11391.5 | 14249.8 | 11927   | 10339.9 | 8483.6  | 11335.5 | 9656.7  | 9176   |
| 6910    | 8522.6  | 5990.1  | 6977.4  | 6275    | 7742.4  | 7330.5  | 5219.4  | 8779.4  | 4799.4  | 8022.3  | 9044.2  | 6619.5  | 8647.1  | 7243.1  | 8299.9  | 5888.6  | 1700.3  | 3666.5  | 6135.4  | 3944.9  | 5163   |
| 2657.3  | 1872.7  | 2445.2  | 2770.7  | 2095.9  | 1763.9  | 1795.4  | 1879.2  | 2501.7  | 1767    | 2364.8  | 1696    | 1953.7  | 2304.5  | 1236.3  | 1849.3  | 1172.9  | 329.8   | 359.2   | 2194.6  | 402.2   | 1161.5 |
| 22954.6 | 22540.6 | 22250.4 | 22682.1 | 24613.4 | 22188.5 | 30034.8 | 14750.2 | 30194.5 | 12969.9 | 25618.9 | 21228.3 | 20405.1 | 22634.1 | 13940.1 | 10136.8 | 20851.6 | 14065.2 | 12379.7 | 8745.7  | 12149.7 | 19193  |
| 7029    | 6106.6  | 8184.6  | 5362    | 4610.6  | 5697.5  | 5779.7  | 3583.6  | 7012.6  | 5525.8  | 4988.2  | 4984.8  | 4996    | 3427    | 3220.1  | 4516.6  | 3641.9  | 3075.8  | 4045.1  | 4894.1  | 3170.5  | 3797.5 |
| 1647.2  | 1870    | 1386.5  | 1161.8  | 1521.3  | 1085.5  | 1047.1  | 587.8   | 2103    | 1416.5  | 1222.1  | 1362.5  | 1561.5  | 1334.5  | 1301    | 1662.1  | 909.5   | 506.2   | 651.3   | 1522.3  | 936.2   | 832.7  |
| 1290.5  | 1111.4  | 2105.6  | 1160.7  | 1460.9  | 1748.6  | 1843.2  | 1055.8  | 1798.2  | 1337.6  | 1192.2  | 1551.8  | 2032.7  | 1455.9  | 1950.4  | 1312.4  | 925.2   | 732.9   | 1225.8  | 263.1   | 712.1   | 594.9  |
| 2012.4  | 1531.1  | 1539.7  | 1707.9  | 1444.3  | 1631    | 1783.6  | 2614.6  | 2169.5  | 1299.5  | 3844    | 978.7   | 1625.2  | 1513.3  | 2064.2  | 1320.4  | 1519.4  | 712.3   | 953.3   | 1099.9  | 1102.1  | 853    |
| 5057.5  | 4274.3  | 5325.8  | 5394.6  | 4992.3  | 6064.8  | 6902.5  | 4331.8  | 6178    | 4121.1  | 5923.9  | 3886.6  | 3336.2  | 2938.9  | 2746    | 4342.7  | 3284.3  | 1848.8  | 325.9   | 4299    | 429.3   | 2877.5 |
| 2942.3  | 3493.8  | 3103.8  | 2328.9  | 3662.9  | 3444.8  | 3780.2  | 3275.6  | 2929    | 4559.5  | 3510.4  | 3323.1  | 3051.9  | 3577.2  | 2461    | 3857.3  | 2259.5  | 1959.1  | 258.1   | 3365.8  | 1907.7  | 2211.4 |
| 1782.5  | 2156.2  | 3171.2  | 1931    | 4066.7  | 3019.3  | 4374.7  | 1881.4  | 2792.2  | 2910.6  | 2855.7  | 2844.8  | 2367.3  | 2795.7  | 2740.9  | 566.7   | 2038.3  | 1812.6  | 477.9   | 1464.4  | 785.8   | 2174.7 |
| 1911.8  | 4457.1  | 4637.4  | 3134.5  | 4614.2  | 3722.5  | 5600.6  | 3107.6  | 4364.9  | 3547    | 4966.7  | 2511.1  | 3614.4  | 2845.3  | 3498.7  | 2718.7  | 1374.4  | 999.3   | 1252.4  | 2053.8  | 1750.6  | 2576.5 |
| 2044.4  | 2151.3  | 1776.3  | 3027.5  | 2446.3  | 2111.9  | 2041.5  | 1374.4  | 1711    | 1548.3  | 2524.9  | 2414.3  | 2313.2  | 1575    | 1454.6  | 2648.7  | 1643.3  | 821.2   | 1082.4  | 1093.6  | 1317    | 1086.1 |
| 4135.3  | 5008.4  | 3334.3  | 6243.8  | 6401    | 5556.1  | 6370.4  | 6518.6  | 4649.9  | 4952    | 6732.6  | 4560.8  | 5022.8  | 4013.6  | 4979.6  | 6462    | 3666.1  | 2412.2  | 2090.6  | 4065.4  | 3046    | 3382.3 |
| 1502.9  | 2280.1  | 1050.6  | 1496.9  | 1080.2  | 1149.6  | 1361.1  | 1662.9  | 1753.6  | 1873.7  | 729     | 1488.1  | 978.2   | 1483    | 949.2   | 1175.7  | 872.8   | 1649    | 478.5   | 1020.3  | 650.2   | 965.6  |
| 4420.6  | 6285.7  | 4872.1  | 5179.5  | 5460.8  | 5187    | 5163.2  | 4040.5  | 6503.7  | 5322.9  | 4274.4  | 4062.4  | 5670.4  | 4451.5  | 4351.6  | 4247.6  | 1427.7  | 544.1   | 416.9   | 1331.5  | 1298.7  | 1178.3 |
| 2764.7  | 3408.7  | 2731.4  | 4255.5  | 3699    | 3291.9  | 3212.9  | 3295.6  | 4023.8  | 3453.5  | 4281.7  | 3665.7  | 4398.8  | 3207.4  | 4205.5  | 4906.6  | 2143.6  | 1666.8  | 1609.6  | 2107.6  | 2052.7  | 2342.6 |
| 2194.5  | 2051.4  | 2047.1  | 2663    | 2440.5  | 2563.6  | 2442.6  | 2860.5  | 2268.9  | 3681.2  | 2271.5  | 2430.6  | 2183.4  | 2679.9  | 2062.8  | 2566.2  | 1763.5  | 1196.2  | 1008.3  | 1542.8  | 1046.6  | 797.2  |
| 2550.6  | 3485.1  | 2695.1  | 2435    | 4086.2  | 3748.4  | 4934.5  | 3420.5  | 3333.7  | 3460.2  | 3867    | 2608.2  | 2709.8  | 2703.8  | 2835    | 3277.4  | 2275    | 1543.1  | 920.8   | 1534.4  | 2002.2  | 2602.4 |
| 1898.8  | 2635.1  | 1731    | 2203.4  | 1414.1  | 2383.9  | 2292.7  | 1647    | 2207.1  | 1629.2  | 1664.5  | 1880    | 1598.8  | 1854.5  | 1799.3  | 1949.6  | 1155.7  | 1548.7  | 504.4   | 993.4   | 1562.7  | 1205.3 |
| 1970.3  | 2163.9  | 523.2   | 1414.9  | 750     | 1098    | 971.2   | 599.6   | 2225.6  | 1219.1  | 936.9   | 1546    | 1956.8  | 1717.1  | 1024.9  | 1150.8  | 1347.4  | 261.7   | 130.1   | 743.6   | 794.7   | 682.1  |
| 12495.6 | 14887.1 | 7645.4  | 8940.6  | 11176.1 | 12030.5 | 13100.7 | 12909.4 | 18176.3 | 13029   | 13843.2 | 18291.1 | 15695.2 | 16520.7 | 8511.6  | 10105.6 | 11017.1 | 2149.4  | 3326    | 9270.1  | 5080.6  | 5589.7 |



|         |         |         |         |         |         |         |         |         |         |         |         |         |         |         |         |         |         |         |         |         |         |
|---------|---------|---------|---------|---------|---------|---------|---------|---------|---------|---------|---------|---------|---------|---------|---------|---------|---------|---------|---------|---------|---------|
| 1761.1  | 1619.4  | 1532.5  | 1493.5  | 1795.5  | 1162.3  | 1540.6  | 2126.6  | 1809.1  | 1730.6  | 2440.4  | 2087.4  | 2554    | 2034.3  | 1635.4  | 2050.1  | 1475.8  | 915.1   | 1046.2  | 1149.7  | 809.8   | 892     |
| 7279.6  | 7326.6  | 5898.7  | 7589.2  | 7773.5  | 6153.9  | 7780.1  | 6186.6  | 10276.5 | 8100.5  | 7510.3  | 5672.2  | 6575.6  | 6191.9  | 3925.8  | 7591.4  | 3659.5  | 2950.1  | 3019.1  | 4543.4  | 3206.5  | 4140.6  |
| 1894    | 1935.6  | 1611.3  | 1917.9  | 1761.5  | 1149.3  | 1858.6  | 1661.2  | 2461.9  | 1697.5  | 1449.8  | 1247.1  | 1546.5  | 1380    | 1413.7  | 2001.8  | 1205.5  | 812     | 508.8   | 1370.7  | 1096.4  | 1358.7  |
| 189.2   | 430.6   | 729.2   | 166.2   | 1144.6  | 264.9   | 362.6   | 660.8   | 798.2   | 417.1   | 288.2   | 574.5   | 542.2   | 579.8   | 1048.2  | 504.8   | 362.1   | 119.6   | 225.6   | 316.8   | 187.1   | 187.9   |
| 373.2   | 1359.9  | 1710.6  | 1189.7  | 1032.8  | 1404.8  | 1627.9  | 769.6   | 1692.5  | 1417.5  | 1126.9  | 1507.3  | 825.4   | 1547.7  | 1323    | 1727.1  | 1256.5  | 982.8   | 144.7   | 269.4   | 294.9   | 561.3   |
| 1152.8  | 1493.3  | 838.9   | 1018    | 1185    | 1006.9  | 1010.9  | 1272.2  | 1554.2  | 951.3   | 1571.8  | 1673.5  | 1616.5  | 1549.3  | 1256.4  | 1454.7  | 892     | 575.5   | 467.2   | 848.7   | 1020.5  | 1068.1  |
| 14164.6 | 15504.9 | 16622.4 | 16452.2 | 15509.3 | 19539.2 | 16926.7 | 14045.9 | 15597.6 | 19255.1 | 19894.1 | 10931.7 | 17295.9 | 11976.2 | 15106.4 | 14190.1 | 9429    | 7548.9  | 8450.5  | 8407.3  | 10375.8 | 14805.4 |
| 3072.4  | 3174    | 5070.5  | 3330.9  | 3207    | 2889.8  | 2161    | 4276    | 3377.2  | 3764.7  | 2438.1  | 4200.2  | 3046    | 3836.4  | 3266.1  | 1463.2  | 2584.1  | 1384.5  | 726.5   | 1742.9  | 1637.7  | 1405.2  |
| 3348.9  | 3770.2  | 4369.3  | 2332.6  | 3170.3  | 3092.9  | 3107.4  | 1323.8  | 4706.2  | 2268    | 3064.4  | 3581.4  | 1900.6  | 3559.3  | 2792.5  | 2960.5  | 2600.6  | 1889.8  | 1098    | 1303.7  | 1709    | 2511.3  |
| 1987.4  | 2209.8  | 2566.9  | 2178.8  | 1512.8  | 1199.7  | 1344.4  | 1321.1  | 1646.3  | 1564.7  | 2055.2  | 1534.5  | 1233.8  | 895.7   | 1444.2  | 1426.8  | 1051.8  | 461.6   | 690     | 2127    | 1500.6  | 1339.1  |
| 1324.9  | 929.6   | 600.6   | 1411.5  | 1291.3  | 722.9   | 1089.1  | 467.8   | 1506.7  | 954.9   | 1191.8  | 875.9   | 188.3   | 959.8   | 430.1   | 325.2   | 627.7   | 223.5   | 365.3   | 229.7   | 424     | 325.5   |
| 1290.6  | 2435.4  | 1865.3  | 1543.6  | 1662.3  | 1025.2  | 1192.5  | 725.9   | 1712.2  | 1480.8  | 1846.1  | 1661.5  | 1009.7  | 1071    | 1574.7  | 1651.2  | 874.6   | 362.6   | 440.5   | 1140.3  | 1964.4  | 1533    |
| 4000.3  | 4012.3  | 3997.8  | 2754.8  | 3795.1  | 4104.8  | 5131    | 3092.3  | 7359.5  | 2107.3  | 5061.4  | 4840.8  | 3338.4  | 3788.7  | 3727.1  | 4370.9  | 2135    | 2371.8  | 1739.6  | 2980.1  | 2316.2  | 3868.4  |
| 2300.7  | 3922.8  | 2954.1  | 2401.3  | 2420.2  | 2500.6  | 2982.1  | 2236.6  | 2852.1  | 2925.5  | 1875.2  | 2927.1  | 3452.3  | 3501.7  | 1889.6  | 2794.1  | 458.5   | 1004.9  | 467.1   | 712.1   | 392.2   | 761.6   |
| 1912.4  | 1412.6  | 1551.5  | 2062.1  | 1476    | 1358.4  | 1309.6  | 966.3   | 1030.4  | 846     | 1735    | 1487    | 1545.6  | 1540.9  | 1805.9  | 1334.9  | 1366.3  | 1036.9  | 943.5   | 1095.9  | 274.9   | 842.4   |
| 2034.6  | 1515.9  | 1444.8  | 1538.8  | 1357.6  | 1462.5  | 1187.3  | 941.2   | 1548.6  | 1698.1  | 1105.7  | 2029.9  | 2073.5  | 2548.2  | 996.8   | 2439.2  | 579.5   | 378.9   | 394.8   | 433.2   | 701.7   | 613     |
| 2170.5  | 1918.4  | 2229.7  | 1832.2  | 1570.8  | 1250.6  | 2026.2  | 966.5   | 2686.5  | 1825.8  | 1626    | 1863    | 1589    | 2287.2  | 2070.9  | 1142.3  | 1905.4  | 1293.1  | 1187.5  | 1166.8  | 1048.2  | 2223.4  |
| 2580.2  | 2281.2  | 3219.6  | 3185.1  | 3064.8  | 3189    | 3444.4  | 1468.4  | 3799.7  | 3408.1  | 4966.2  | 2549.8  | 2186    | 4278.2  | 991.9   | 3793.2  | 2359.2  | 1258.3  | 1410.6  | 1573.9  | 906.2   | 1884.1  |
| 1718    | 2787.4  | 2723.2  | 4758.6  | 3502.8  | 4087.4  | 2578.9  | 1766.7  | 3928.1  | 2828.6  | 2401.5  | 3412.9  | 1714.2  | 3257.6  | 1846.6  | 1558    | 979.8   | 522.2   | 536.5   | 1311.9  | 616.9   | 2565.8  |
| 2902.6  | 1732.5  | 2514.1  | 1430.1  | 2259.2  | 2095.9  | 2560    | 1984.3  | 2183.3  | 2790.7  | 2317.3  | 2183.7  | 2562.2  | 2273    | 1992.2  | 1787.7  | 1041.1  | 1264.8  | 813.1   | 960.8   | 1290.1  | 1388.7  |
| 319.5   | 1258.5  | 1927.1  | 1086.6  | 1353.5  | 1345.5  | 1250.9  | 844.5   | 801.6   | 742.1   | 785.6   | 1801.8  | 1042.2  | 1042.3  | 819.2   | 1162    | 851.9   | 270.6   | 505.4   | 153.5   | 388.6   | 1101.2  |
| 2434.7  | 2999.9  | 3503    | 2053.1  | 2728.9  | 2633.3  | 3294.1  | 1016.3  | 2105    | 2748.7  | 2038    | 2424    | 2590.7  | 2496    | 2128    | 3775.8  | 2002.1  | 942.7   | 1403.1  | 1580    | 1218    | 1466.2  |
| 1519.1  | 1813.7  | 2059.9  | 1969.9  | 1920    | 2087.7  | 1873.2  | 939.5   | 1838.1  | 2274.5  | 1658.8  | 2101.7  | 1758.7  | 2193.2  | 1177.3  | 2840    | 1928.5  | 1155.6  | 1774.4  | 695.6   | 778.8   | 2192.1  |
| 3115.2  | 3030.3  | 1860.4  | 3286.2  | 2484.5  | 2226.2  | 2704.7  | 3381.5  | 3229.7  | 2115.7  | 4317.2  | 2284.4  | 3286.8  | 3084.7  | 2715.1  | 5004.4  | 1319.4  | 1284.8  | 3641.7  | 2396.5  | 2677.2  | 2898.2  |
| 4278    | 4013.8  | 2868    | 3910.9  | 4201.1  | 2889.7  | 2964.1  | 3806.8  | 3493.5  | 3253.3  | 3508.4  | 4058.6  | 4170.9  | 3089.7  | 3242.8  | 3268.5  | 2622.3  | 2994.8  | 2577.6  | 2646.1  | 2297.3  | 3021.5  |
| 1790.4  | 2039.4  | 1466.8  | 270     | 1199.1  | 836.4   | 847     | 762.5   | 1011.5  | 1555.1  | 417.6   | 338.7   | 773.1   | 1109    | 809.5   | 1407.7  | 185.4   | 243.6   | 259.6   | 369.5   | 277.9   | 770.3   |
| 5327    | 7624.1  | 7846.9  | 2949.3  | 3297.3  | 2125.1  | 6888.5  | 3014.3  | 9185.6  | 4315.5  | 5837.2  | 6461.5  | 2856.7  | 7081.6  | 4624.8  | 4069.6  | 2962.2  | 2236.7  | 1376.9  | 1012    | 2605.1  | 5069.2  |
| 1587.8  | 1264.7  | 1253.8  | 1561    | 1638.2  | 1450.8  | 1453.3  | 1041.5  | 1533.4  | 1714.3  | 1893.6  | 1361.9  | 2290.5  | 1477.8  | 1489.7  | 1689.6  | 616.4   | 588.1   | 154.7   | 1616.5  | 777.9   | 125.3   |
| 1188.4  | 1365.6  | 1002    | 212.7   | 1059.1  | 743.8   | 1088.7  | 777.5   | 1640.4  | 1222.4  | 356     | 1456.8  | 1260.8  | 962.5   | 1189.2  | 1231    | 270     | 431.3   | 180.9   | 356.7   | 211.1   | 132.8   |
| 2080.3  | 1730.3  | 1525.9  | 2119.2  | 1338.5  | 1439.7  | 1344.7  | 1002.9  | 2421.5  | 1597.6  | 1426.7  | 1751.5  | 1605.8  | 1218.4  | 1109.4  | 1044.2  | 1374.3  | 732.4   | 220.3   | 675.6   | 1425    | 894.6   |
| 1042.1  | 1094.5  | 1338.7  | 657.2   | 1015.6  | 1017.2  | 1225.2  | 930     | 1095.3  | 654.8   | 604.1   | 1424.7  | 1329.6  | 1164.8  | 995.8   | 1127.7  | 421.3   | 471.9   | 225.4   | 901.7   | 1076.1  | 627.9   |
| 3069    | 3418.6  | 3201.9  | 2830.5  | 4207.7  | 4159.8  | 4651.6  | 1878.7  | 4505    | 2503.2  | 4020.2  | 2246.1  | 2433.7  | 2569.9  | 2646.4  | 3054.5  | 3422.1  | 1716.4  | 1534    | 2558.5  | 1434.6  | 2962.2  |
| 2993.8  | 4044.5  | 3264.6  | 1414.3  | 2279.3  | 2218.9  | 3449    | 1945.9  | 4480.7  | 2689.8  | 3334.8  | 2487.3  | 2036.2  | 2616.4  | 1347.5  | 1996.4  | 1935.3  | 1251.5  | 2367.9  | 1417.4  | 1159.6  | 2390.9  |
| 1235.7  | 1970.2  | 1809.1  | 1373.7  | 2173    | 3008.9  | 1949.8  | 1484.4  | 1580.2  | 1766.3  | 1377.8  | 2079    | 1452.8  | 1901.9  | 1254.2  | 1894.5  | 1006.2  | 677     | 344.1   | 1284.3  | 865.9   | 1256.9  |
| 4182.7  | 5046.9  | 5069.4  | 4094.5  | 3152.7  | 2687.4  | 3477.2  | 741.2   | 8059.1  | 2294    | 7422    | 2549.3  | 907.8   | 2190.5  | 2846.3  | 5071.5  | 1588.5  | 2280.1  | 1275.4  | 1320.3  | 760.7   | 2097.7  |
| 907.7   | 1287.2  | 936.8   | 784.3   | 897.8   | 350.3   | 1118.2  | 1109.2  | 1063.6  | 865.4   | 762.2   | 1209.4  | 834.5   | 1584.3  | 674.3   | 85.1    | 1575.7  | 461.4   | 126.9   | 286.7   | 332     | 527.7   |
| 4073    | 4529.1  | 3546.8  | 3130.9  | 4466.4  | 3228.2  | 3489.3  | 2582.7  | 4044.7  | 2023.3  | 2696.8  | 3530.2  | 2686.9  | 3707.7  | 1988.3  | 3329.4  | 3265.9  | 2225.3  | 2193.7  | 2211.2  | 1946    | 2700.5  |
| 1143.8  | 1654.7  | 1558.2  | 2292.2  | 1378.8  | 898.5   | 1430.8  | 1414.8  | 1501.1  | 1313.5  | 2048.5  | 1214.6  | 1026.5  | 1059    | 1303.6  | 1712.5  | 1168.6  | 785.4   | 253.7   | 1056.7  | 1142.3  | 946.1   |
| 1083.2  | 793.2   | 1156.2  | 1080.7  | 1048.1  | 1320.2  | 1423.7  | 174.9   | 2213.1  | 1067.4  | 682.4   | 1252    | 217.8   | 544     | 211.5   | 233.7   | 448.4   | 427.4   | 524.2   | 237.3   | 171.6   | 362.1   |
| 29773.8 | 30495.2 | 47095.3 | 31731.6 | 32348.7 | 27609.8 | 33872.2 | 22960.7 | 30265.7 | 32599.8 | 37196.6 | 23233   | 27902.8 | 21346.9 | 25433.2 | 15401.8 | 19189.4 | 18119.3 | 14951.9 | 12123.6 | 20744.6 | 21751.8 |
| 495.8   | 195.1   | 619.7   | 685     | 575.3   | 230.3   | 263.9   | 811.8   | 593.3   | 216.8   | 325.5   | 329.9   | 699.8   | 674.4   | 251.4   | 563     | 300     | 135.8   | 364.2   | 265.3   | 322.9   | 124.5   |
| 1332.5  | 847.4   | 2059.2  | 754.4   | 894.4   | 981.4   | 969.4   | 157.8   | 1511.7  | 1457.7  | 1558.9  | 885.8   | 1042.2  | 1026.4  | 561.4   | 1291.5  | 100.3   | 179.7   | 174.1   | 439.2   | 133.2   | 243.3   |
| 4091.2  | 4506.8  | 3223    | 3821.4  | 6768.3  | 3729.5  | 6271.5  | 3563.7  | 2931.6  | 5230.1  | 4429.8  | 3366.7  | 4604.1  | 3508    | 3003.7  | 6166.1  | 2944.2  | 3190.8  | 1299.2  | 3194.6  | 3788.8  | 2629.7  |
| 2094.8  | 2188.8  | 2585.2  | 1950.7  | 3218.3  | 2234.2  | 2650.3  | 2073.7  | 2237.7  | 2317.1  | 1531.9  | 2842.9  | 2548.7  | 2032.3  | 2772.5  | 1078.7  | 2981.2  | 1617.9  | 590.3   | 928.5   | 682.1   | 2043.1  |
| 1964.8  | 2677.4  | 1463.8  | 1376    | 1942.1  | 1807.8  | 1369.4  | 1953.2  | 2221.3  | 1814.6  | 1972.7  | 3172.2  | 2646.3  | 3077.8  | 1672.9  | 1869.5  | 2001.1  | 676     | 1451.1  | 1911.5  | 1149.4  | 774.3   |
| 10090.5 | 15128.9 | 15441.9 | 6443.2  | 11442.4 | 8139.5  | 12153   | 9726.9  | 13775.8 | 9843.5  | 11885.3 | 12387.6 | 8715.1  | 11382   | 9860.4  | 6391    | 2663.5  | 3088.3  | 2957.2  | 3300.4  | 2557.2  | 3224.3  |
| 1807    | 2939.7  | 2499.8  | 3617.4  | 3420    | 3159.4  | 2020.9  | 1542    | 4188.6  | 2028.6  | 1905.9  | 2048.1  | 2924.3  | 2032.1  | 2309.6  | 2209.6  | 1714.8  | 2356    | 2229.8  | 1465.7  | 1287.4  | 1525    |
| 1174.6  | 2059.1  | 1080.3  | 1687.4  | 1144.9  | 1461.9  | 1137.5  | 2358.1  | 1885.3  | 1112.7  | 488.6   | 732.5   | 1454    | 1109.3  | 1357.7  | 700.4   | 358.2   | 398.3   | 276.2   | 647.7   | 855.1   | 765.6   |
| 1585.1  | 1954.5  | 2339    | 3291.7  | 1592.7  | 2298.8  | 1988.4  | 1679    | 3416.6  | 2218.9  | 2103.5  | 1750.8  | 1069    | 986.1   | 304.9   | 1341.3  | 1395.3  | 624     | 1119.3  | 1613.2  | 873.5   | 700.1   |
| 778.8   | 1965.7  | 1552.2  | 753.9   | 1810.5  | 1195    | 1839.9  | 1119.5  | 2528.4  | 821.7   | 1926.9  | 1726.2  | 1608.1  | 1875.2  | 1509.4  | 1607.5  | 241.1   | 212     | 190.3   | 1175.5  | 932.6   | 1470.2  |
| 2807.1  | 3497    | 3108.3  | 3103.9  | 2559.2  | 2589.2  | 3230.2  | 2998.9  | 3958.9  | 1650.4  | 2995.4  | 3612.3  | 2516.4  | 3360.6  | 2101.4  | 1911.6  | 2776.9  | 1808.5  | 933.5   | 974     | 2477.9  | 3198.1  |
| 1558.6  | 2207.4  | 1877.2  | 1628.6  | 1859.8  | 1441.3  | 1755.3  | 1924.4  | 2562.4  | 990.2   | 2174.9  | 1982.8  | 1869.1  | 1926.2  | 19      |         |         |         |         |         |         |         |

|         |         |         |           |         |         |         |         |         |         |         |         |         |         |         |         |         |         |         |         |         |         |
|---------|---------|---------|-----------|---------|---------|---------|---------|---------|---------|---------|---------|---------|---------|---------|---------|---------|---------|---------|---------|---------|---------|
| 1645.8  | 673.9   | 1788.6  | 400.3     | 2164.5  | 1113.3  | 1333.2  | 1487.6  | 2764.3  | 1005.3  | 1537.7  | 2048.5  | 1405.9  | 1660.4  | 703.1   | 1245.1  | 689.1   | 875     | 1147.1  | 151.1   | 229.8   | 300.3   |
| 1990.7  | 2323.8  | 4145.9  | 1791.5    | 1951.1  | 2699.2  | 2805.8  | 2282    | 3078.7  | 1959.3  | 1610.5  | 1863.2  | 1633.2  | 1589.6  | 1749.6  | 1291.2  | 1651    | 1032.6  | 268.6   | 1240.5  | 778.7   | 2469.3  |
| 1341.4  | 1436.9  | 1745.7  | 1163      | 1271    | 945.1   | 1166.5  | 955.2   | 1656.4  | 1084.4  | 496.6   | 1785.7  | 1434.9  | 1558.7  | 1013.2  | 2209.7  | 776.6   | 704.9   | 360.8   | 287.5   | 893.1   | 525.9   |
| 2445.2  | 2365.3  | 2376    | 2470.9    | 2283.6  | 1868.7  | 3614.2  | 2551.9  | 2464.2  | 1927.7  | 2928.3  | 3667.1  | 2037.3  | 2101.3  | 2791.2  | 2393.9  | 1190.7  | 1451.9  | 1665.9  | 2142.7  | 1972.8  | 2329.3  |
| 13166.6 | 14905   | 12108.7 | 9282.9    | 18927.8 | 15810.3 | 14509.1 | 9869.8  | 13730.6 | 11711.9 | 18301.7 | 12170.6 | 12873.5 | 10310.7 | 15828.7 | 12217.9 | 10001.1 | 6605.5  | 7047.4  | 6489.5  | 8149.4  | 10367.4 |
| 2913.3  | 2463.5  | 2131    | 2503.4    | 1884.1  | 1997.7  | 2657.4  | 2730.8  | 1862.5  | 1852.6  | 1622.3  | 1968.5  | 1729.8  | 1961.4  | 3141    | 2160    | 2067.7  | 863.7   | 459.9   | 2024.7  | 1741.5  | 2133.2  |
| 1551.6  | 2803.5  | 1279.6  | 1343      | 1230.7  | 1177.7  | 1603    | 1202.8  | 2248.7  | 1124.8  | 1697    | 2366.3  | 1979.3  | 1872.4  | 1936.5  | 1387.5  | 1791.9  | 1035.4  | 492.7   | 198.4   | 309.2   | 1088.5  |
| 2046.7  | 1763.6  | 1454.7  | 1886.3    | 1713.1  | 1075.6  | 1510    | 1613.6  | 2131.1  | 1176.3  | 1766.2  | 1689.2  | 2022.1  | 2126.1  | 1231.7  | 1325.4  | 1312.7  | 1030.2  | 325.5   | 1327.2  | 968.5   | 1404.1  |
| 4063.2  | 3184.8  | 6045.2  | 4263.6    | 4003.4  | 4110.5  | 4048.5  | 3463    | 5909.4  | 3731.3  | 4673.7  | 6456.3  | 3636    | 4344.3  | 2725.3  | 3657.5  | 2924.3  | 2448.6  | 2804.6  | 2329    | 2356.1  | 3256.2  |
| 14193.9 | 13028.7 | 10637.9 | 9441.1    | 7243.6  | 10736.7 | 13649.7 | 6772.7  | 17466.3 | 7581.8  | 16701.7 | 10360.8 | 12347.1 | 9321.1  | 13102.7 | 11566.7 | 7932.6  | 6305.5  | 6921.6  | 5301.5  | 7572.6  | 7713.8  |
| 4088.2  | 5009.7  | 2920.2  | 1124.6    | 1242.5  | 1382.1  | 2633.6  | 2434.1  | 2720    | 1988    | 1765.2  | 3211.4  | 2435.1  | 3411.4  | 3077.9  | 2220.9  | 1793.6  | 921.2   | 987.3   | 1375.2  | 1740.5  | 2189.4  |
| 1350.1  | 1271.2  | 1396.6  | 146.7     | 1186.8  | 1830.6  | 403.1   | 510.4   | 1255.9  | 620.9   | 1113    | 1335.2  | 1503.2  | 1513.8  | 1225.9  | 1305.1  | 480     | 570.7   | 1407.8  | 1015.7  | 169.9   | 154.5   |
| 1793.8  | 1425.4  | 946.8   | 829.5     | 1287.9  | 936.8   | 632     | 876.9   | 1287    | 845.8   | 1572.4  | 1184.9  | 1531    | 1679.5  | 1625.4  | 2007.6  | 515.7   | 186.8   | 227.2   | 923     | 1133.4  | 826.6   |
| 1314.8  | 2015.2  | 1587.8  | 1510.9    | 2212.7  | 1756.9  | 1705    | 2146.9  | 2511.9  | 1530.2  | 1792    | 2366.7  | 2828.4  | 2908.6  | 2323.8  | 2601.3  | 1374.5  | 363.8   | 691.9   | 1595.6  | 2454.6  | 2521.2  |
| 2777    | 2518.2  | 2878.1  | 2649.1    | 3639.2  | 2512.5  | 2997.4  | 3566    | 4423.4  | 2004.9  | 4053.2  | 3999.5  | 2177.1  | 3264.6  | 3162.9  | 5049.7  | 2298.1  | 678.5   | 951.6   | 3016.5  | 2552.4  | 2835.9  |
| 37122.7 | 40167.6 | 47140.8 | 42121.3   | 35807.5 | 38898.2 | 33178.6 | 26008.5 | 56845.9 | 43224.6 | 32868.9 | 43648.4 | 23447   | 40597.2 | 27639.6 | 34213.7 | 35561.7 | 21684.7 | 20734.5 | 31412.5 | 21944.1 | 29553.5 |
| 2938.6  | 4346.3  | 5938.8  | 4947.3    | 4586.2  | 5846.8  | 5127.5  | 2278    | 6257.1  | 3667.9  | 5373.9  | 4652.4  | 4201.5  | 4756    | 4438.2  | 2593.2  | 3420.4  | 2298.5  | 1880.9  | 3560.9  | 2971.6  | 3073    |
| 1883.1  | 1794.3  | 1179.6  | 998.8     | 1370.8  | 865.3   | 1216.1  | 1219.3  | 1714.4  | 1176.4  | 1073.5  | 1463    | 1772.1  | 1017    | 1147.8  | 1278.6  | 579.6   | 468.3   | 467.8   | 704.1   | 279.1   | 564.2   |
| 896.6   | 1999.5  | 1642.3  | 2615.1    | 1868.7  | 1941.6  | 1757.6  | 1868.4  | 2989.1  | 1804.4  | 2050.9  | 2495.4  | 1850    | 2437.6  | 2716.2  | 437.5   | 1747.6  | 1022.2  | 628.8   | 633.3   | 423.6   | 376     |
| 4962.9  | 4351.7  | 5040    | 5149.7    | 4170.8  | 3093.1  | 4827.9  | 2841.3  | 8012.7  | 2971.5  | 4468.1  | 5969.8  | 5102.3  | 5203.6  | 2462.8  | 4530.1  | 3635.5  | 2204.7  | 4343.6  | 2533    | 1898.8  | 3003.1  |
| 4010    | 3846.5  | 3871.7  | 3543.5    | 4442.4  | 3769.6  | 3265.9  | 3234    | 4189.6  | 2877.4  | 3739.4  | 3859.7  | 3796.7  | 3200.8  | 3861.2  | 4278.9  | 2715.6  | 2111.1  | 2878.3  | 2475.7  | 3090.5  | 2791.9  |
| 4968.9  | 4434    | 6182.4  | 4000.1    | 3595.2  | 4576.4  | 4473.7  | 3915.5  | 6389.6  | 3114    | 4085.8  | 4871.5  | 3872.2  | 4713.5  | 4435    | 5032.2  | 2924.1  | 2383.8  | 3107.7  | 5672    | 2844.4  | 4018.8  |
| 2346.7  | 3155    | 3472.6  | 2535.7    | 4316.6  | 3795.4  | 5468.8  | 3131.7  | 5808.3  | 2969.5  | 4206.1  | 3094.8  | 3819.7  | 3705.2  | 3660.6  | 2766.4  | 2992.8  | 1693.5  | 1239.7  | 2469.7  | 2491.1  | 3815.5  |
| 5826.6  | 6286.4  | 6227.6  | 4721.2    | 6771.4  | 6621.4  | 8960.8  | 3232.8  | 8278.1  | 5180    | 6685.2  | 5284    | 5381.8  | 4850.7  | 3387.3  | 5032.9  | 4138.5  | 4116.1  | 3267.1  | 4338.8  | 3114.8  | 5294.5  |
| 1962    | 2647.5  | 2112    | 1005.1    | 2731.9  | 1822.2  | 1840.1  | 1471.2  | 1954.2  | 1467.8  | 2098.9  | 1173.6  | 1560.3  | 810     | 977.9   | 1685.8  | 1370.2  | 1183.8  | 354.3   | 1161.5  | 1199.3  | 1344    |
| 2236.5  | 1973.3  | 1523    | 1417.6    | 1502.9  | 2180.3  | 1887.5  | 3004    | 3921.7  | 2044.7  | 3130.8  | 3035.4  | 3475.3  | 2284.1  | 2144    | 1548    | 1848.9  | 843.5   | 1119.6  | 1447.8  | 840.1   | 1341.5  |
| 3259    | 4126    | 2649.8  | 1726      | 3698    | 2439.5  | 2560.3  | 1930.1  | 5465    | 2016.2  | 4080.7  | 3987.1  | 3766.9  | 3522.1  | 2995.5  | 4818.9  | 3619    | 1982.8  | 2078    | 2482.6  | 2840    | 2581.8  |
| 1155.1  | 1329    | 1177.5  | 165.8     | 773.9   | 610.2   | 1009.1  | 196.3   | 1493.5  | 982.8   | 1092.3  | 1157    | 1104    | 1134.9  | 392.4   | 1221    | 571.2   | 193.2   | 655.7   | 842.1   | 298.9   | 350.8   |
| 12718.7 | 9720    | 12714.5 | 10716.1   | 20256.1 | 9242.8  | 16647.3 | 13912.5 | 11018.1 | 13588.3 | 18209.8 | 18319.1 | 29100.4 | 19956.9 | 10599.2 | 18679.7 | 8970.7  | 14199.9 | 3097.9  | 9953.7  | 14060.8 | 6648.1  |
| 1398.8  | 1218.4  | 1181.3  | 1020.1    | 878.9   | 867.4   | 729.3   | 801.8   | 1879.6  | 1026.4  | 1414.3  | 615     | 934.4   | 1329    | 619.2   | 1204.4  | 782.7   | 473.6   | 1075.8  | 696     | 536.1   | 327.9   |
| 4221.8  | 5008.2  | 4340.5  | 3240      | 3786.2  | 3206.4  | 4450    | 3103.3  | 6865.9  | 3437.5  | 5730.4  | 3760    | 3354.5  | 3394    | 3284.1  | 3267.7  | 4445.7  | 2015.1  | 292.8   | 2271.4  | 1863.5  | 3726.8  |
| 4292.8  | 4131.4  | 3843.4  | 2726.6    | 5799.2  | 5278    | 5880.9  | 3002.1  | 6827.5  | 5095.2  | 4489.1  | 4766.5  | 3333.1  | 3269.4  | 3693.1  | 3780.2  | 2222.2  | 2158.7  | 1506.8  | 2371.2  | 2299.4  | 3535.9  |
| 506.2   | 698.3   | 1302.6  | 888.1     | 1564.3  | 1719    | 1392.6  | 187.8   | 1327.5  | 910     | 1692.1  | 970     | 1217.5  | 840.8   | 470.9   | 362.3   | 562.8   | 404.2   | 268.4   | 414.6   | 559.7   | 282.1   |
| 1774.6  | 1580.6  | 1518.8  | 3386.7    | 2730.7  | 2059.2  | 2718.4  | 1017.1  | 806.8   | 1825.1  | 2099    | 1250.9  | 2342.3  | 1587    | 1487.5  | 3527.6  | 1033.9  | 842.6   | 159.3   | 695.8   | 995.5   | 696.1   |
| 42303.2 | 47783.1 | 56578.7 | 43031.3   | 34809.4 | 46132.7 | 44387.7 | 40502.3 | 37947.9 | 36266.5 | 35523.7 | 44960.5 | 39476   | 43761   | 30997.3 | 36029.7 | 22283.7 | 32561.4 | 20235.7 | 20333.3 | 25130.3 | 25590.3 |
| 2253    | 2442.3  | 2339.5  | 2623.4    | 2559.9  | 1806    | 2604.2  | 930.6   | 3710.5  | 2794.2  | 2201.1  | 1359.3  | 1969.4  | 1338.3  | 1329.3  | 2159.4  | 1314.3  | 982.4   | 609.9   | 276.1   | 623     | 238.2   |
| 1112.3  | 1742.6  | 1045.5  | 1329.7    | 1435    | 1968.7  | 1778    | 1401.7  | 1862.8  | 1378.7  | 1873.3  | 1854.7  | 1717.1  | 1581.1  | 1677.9  | 1767.1  | 429.7   | 446.3   | 1816.7  | 739.7   | 239.9   | 750.2   |
| 12627.4 | 14084.2 | 11752.1 | 11132.4   | 15454.1 | 9542.6  | 15130.8 | 7925.8  | 18934.7 | 11790.7 | 14514.8 | 13449.8 | 8541.4  | 12534.5 | 12286.7 | 14184.2 | 6515.8  | 3437.1  | 2795.2  | 8166.7  | 5086.8  | 6870.7  |
| 2082.3  | 2243.3  | 1811.5  | 1823.8    | 1938.9  | 1043.1  | 1588.7  | 1391.4  | 2252.9  | 1554.8  | 1575.2  | 2503.5  | 1996.1  | 1923.5  | 2213.7  | 2918.7  | 799.7   | 678.6   | 340.7   | 1015.8  | 1015.1  | 1291.4  |
| 1389.2  | 2157    | 1728.9  | 1929.2    | 2505.4  | 2011.9  | 2036.1  | 2154    | 2840.6  | 1869.6  | 2534.5  | 2145.6  | 2323    | 1976.3  | 1744.2  | 2066.6  | 1983    | 962.2   | 1761.8  | 2248    | 689     | 1655.8  |
| 3468.5  | 4295.5  | 2379.6  | 3742.5    | 4183.6  | 5142    | 4090.3  | 2436.5  | 5835.3  | 5346.2  | 3370.1  | 3535.8  | 2584.3  | 3380.8  | 3858.8  | 3593.9  | 1456.9  | 1103.1  | 2111.6  | 4505.8  | 1731.6  | 2528.7  |
| 1925.4  | 2206.3  | 2377.2  | 1239.8    | 1746.4  | 2208.9  | 1605.1  | 1426.9  | 1947.8  | 1733.6  | 1441.5  | 1648.1  | 1514.4  | 1775.1  | 1437.1  | 2469.6  | 1842.8  | 961.9   | 1949    | 577.3   | 1580.8  | 1382.6  |
| 866.6   | 1231.3  | 1558.1  | 300.4     | 1408.7  | 1203.7  | 746.7   | 973.4   | 1734.9  | 1160.4  | 988     | 1158.2  | 1170.8  | 1843.8  | 1668.3  | 656.3   | 892     | 302.2   | 330.3   | 194.5   | 1108.6  | 1121.5  |
| 1511.4  | 1864.5  | 1400.2  | 1876.6    | 2990.5  | 935.3   | 940.8   | 2408.3  | 2079.9  | 1955.3  | 1833.6  | 1129.1  | 2157.4  | 910.7   | 1340.1  | 1948.1  | 897.1   | 795.7   | 403.7   | 400.9   | 941     | 660.9   |
| 7596.6  | 7039.3  | 8577    | 6753.1    | 7625    | 6558.5  | 11349.2 | 5443.2  | 11588.8 | 7673.9  | 9147    | 3272.6  | 7308.7  | 3096.3  | 5928.8  | 6902.3  | 3009    | 3757.2  | 970     | 4674.4  | 5815.1  | 3655.9  |
| 634.1   | 642.2   | 730.5   | 92.9      | 512.3   | 718.3   | 681.4   | 203.1   | 1049.2  | 497.6   | 632.1   | 552.9   | 445.6   | 694     | 179.6   | 131.4   | 299.4   | 257.5   | 200     | 281.7   | 118.6   | 351.3   |
| 2262.7  | 2554.4  | 2112.9  | 2796.1    | 2273.5  | 1818    | 1625.3  | 1341.6  | 3332    | 1927.4  | 2748.9  | 2582.3  | 1347.6  | 2256.4  | 1379.5  | 2767    | 1732.5  | 795.8   | 584.6   | 1620.4  | 977.4   | 1034.9  |
| 2828.7  | 3301.1  | 2952.2  | 2580.5    | 4161.2  | 3406.2  | 3939.7  | 2970.3  | 4268    | 2326.8  | 3601.4  | 4874.4  | 3128.3  | 3134.3  | 2071.2  | 3956.7  | 2808.8  | 1287.5  | 887.1   | 1002.6  | 3310    | 2548.8  |
| 13919.8 | 13794.6 | 14610.8 | 15902.2   | 15491.7 | 16429.1 | 15362.9 | 6359.6  | 17190.8 | 12265.1 | 12409.5 | 14543.3 | 18210.9 | 13277.9 | 9455    | 19468.8 | 9221.9  | 7923    | 1831.7  | 10374.9 | 9083    | 5911.5  |
| 2164.4  | 2021.4  | 2191.8  | 1562.2    | 2046.4  | 2498.2  | 2870.4  | 1927.2  | 2883.4  | 1938.5  | 2436.9  | 1316.3  | 1751.9  | 1522.9  | 1382.9  | 1721.4  | 1409.1  | 782.6   | 711.5   | 2107.5  | 1338.6  | 1435.7  |
| 6579.3  | 5327.7  | 4440.2  | 4851.3    | 4323.3  | 3685.1  | 6312.1  | 4688.4  | 5462.9  | 5087.7  | 4914.6  | 2866.7  | 3932.8  | 4580.5  | 2851.8  | 4462.2  | 2996.4  | 4085.4  | 2597    | 2904.1  | 4350.4  | 3068.4  |
| 12672.2 | 14350.8 | 11880   | 12980.2</ |         |         |         |         |         |         |         |         |         |         |         |         |         |         |         |         |         |         |

|         |         |         |         |         |         |         |         |         |         |         |         |         |         |         |         |         |        |         |         |         |         |
|---------|---------|---------|---------|---------|---------|---------|---------|---------|---------|---------|---------|---------|---------|---------|---------|---------|--------|---------|---------|---------|---------|
| 3258.5  | 2811.6  | 2017.8  | 1207.2  | 3334.9  | 2415    | 2442.8  | 2431.1  | 2095.2  | 2732    | 3398.6  | 1920.1  | 2915.1  | 3134.8  | 2944.5  | 3368.1  | 1300.2  | 1348.3 | 1646.6  | 1739.1  | 1780.3  | 1446    |
| 2570.1  | 2824    | 2353.9  | 1703.3  | 2424.2  | 1633.2  | 2426.7  | 1703.3  | 3114.7  | 2435.3  | 2640.5  | 2558.5  | 2210.9  | 2626.1  | 2375.4  | 2905.5  | 1471.5  | 1025.4 | 1106.4  | 1129.5  | 1468.4  | 1218.5  |
| 9594.1  | 9483    | 10038.7 | 11567.8 | 9752.3  | 9490.9  | 11126.5 | 5636.9  | 14497.1 | 8874.5  | 9980.3  | 8699.6  | 6858.8  | 8529.2  | 5881.3  | 11566.3 | 6041.9  | 4000.3 | 6254.8  | 7802    | 4719.3  | 6756.2  |
| 9301.5  | 8928.7  | 11944.5 | 6294.9  | 11552   | 8311.8  | 9586.8  | 7452.9  | 10765.3 | 7345.8  | 10539   | 11976.7 | 8623.9  | 8883.6  | 8198.6  | 11183.8 | 8757.3  | 4861.5 | 7438    | 6600    | 6591.9  | 6392.2  |
| 9095    | 10923.6 | 11988.3 | 8190    | 8565.4  | 10384.1 | 12545.1 | 12496.4 | 15226   | 6463.9  | 12887.3 | 13775.1 | 10190.9 | 13555.5 | 14394.1 | 7465.3  | 5042.2  | 4512.6 | 7936.8  | 5010.6  | 6331.2  | 6635.9  |
| 326.3   | 425.1   | 312.1   | 1017.9  | 264.9   | 165.4   | 943.3   | 197.1   | 413.6   | 515.5   | 403.6   | 575.7   | 206.9   | 556.6   | 225     | 438.2   | 211.2   | 68.5   | 225.9   | 126.6   | 136.2   | 112.6   |
| 1590.9  | 1684.6  | 1694.2  | 1596    | 1173.7  | 1076.8  | 1366.3  | 1398.2  | 1929.4  | 1046.6  | 1655.7  | 1448.7  | 1752.2  | 1216    | 953.8   | 1652.8  | 959.2   | 737.4  | 520.8   | 1140    | 1361.1  | 854.3   |
| 1256.9  | 1705.5  | 2138.3  | 1990.7  | 2205.8  | 1595.7  | 2050.4  | 1149.6  | 1557.4  | 1852.3  | 1331.5  | 2548.9  | 1056.7  | 1459.1  | 390.6   | 1533.3  | 840.7   | 320.6  | 163.2   | 1214.6  | 1487.4  | 1120.4  |
| 2293    | 2500.9  | 2664.7  | 1855.8  | 2217.6  | 2351.4  | 2469    | 1935    | 2487.5  | 1790.3  | 2299.3  | 1504    | 1804.9  | 1635    | 1787.7  | 2691.3  | 1730.2  | 711    | 2315.4  | 652.6   | 1021.6  | 1866.1  |
| 1741.9  | 1999.7  | 2288.7  | 2111.1  | 2009.6  | 2047.9  | 2758.3  | 1726    | 3451.3  | 1530.3  | 2010.3  | 2197.4  | 2540.6  | 2585.2  | 1669.7  | 2867.6  | 1251.7  | 855.2  | 806.9   | 2007.8  | 1936.8  | 936.7   |
| 2416.9  | 2897.2  | 2015.9  | 2247.2  | 2647.9  | 3086.1  | 2378.9  | 2377.4  | 2660.8  | 2164.3  | 3303.8  | 2801.1  | 2608.6  | 2572    | 2395.1  | 3092.9  | 1181.5  | 666.1  | 1077.9  | 1558.9  | 1429.3  | 1627.5  |
| 2064.6  | 1448.7  | 1505.9  | 2164.1  | 1110.1  | 835.3   | 1717.3  | 1207.3  | 2320    | 1142.8  | 1963.3  | 1461.7  | 1002.7  | 1274.9  | 468.1   | 1715.5  | 349.5   | 565.8  | 1184.4  | 2146.6  | 658.8   | 1259    |
| 3913.4  | 2038.3  | 2306.9  | 3197.9  | 2477    | 2942.9  | 3403.9  | 2861.8  | 3948.5  | 2986.1  | 1906    | 2866.6  | 4018.8  | 3190.2  | 3074.7  | 2805.5  | 3058.3  | 2491.6 | 2635.7  | 2879.3  | 2029.3  | 713.3   |
| 836.8   | 784.7   | 694.5   | 1456.1  | 681.5   | 614.7   | 737.6   | 671.5   | 1318.5  | 538.8   | 228.1   | 929.6   | 169.2   | 930.7   | 368.9   | 1054.6  | 719     | 96     | 175.8   | 216.3   | 108     | 739.7   |
| 2160.3  | 2667.8  | 3875.9  | 1373.9  | 2555.1  | 2520.6  | 2465.6  | 1378    | 2236.9  | 3017.3  | 2208.9  | 2231.4  | 1834.8  | 2009.3  | 1283.8  | 2749.4  | 1260.6  | 802.4  | 457.7   | 155.1   | 424.5   | 300.9   |
| 3958.2  | 5264.4  | 5017.3  | 4767.4  | 6261.5  | 5062.8  | 6139.8  | 4423.9  | 5215.6  | 5198.6  | 6724.6  | 5133    | 4294.6  | 5229.2  | 3343.3  | 8343.8  | 1857.3  | 1590.1 | 1424.2  | 160.3   | 1560.9  | 2244.3  |
| 3578.5  | 4657    | 4811.1  | 4817.7  | 5731    | 4518.3  | 3926.7  | 4404.3  | 5309.2  | 3245.7  | 3861.7  | 4355.9  | 4688.2  | 3314.6  | 3914.5  | 4959.3  | 2919.4  | 3243.6 | 3344.9  | 4940.9  | 2948.3  | 2712.9  |
| 2231.3  | 1685.6  | 2170.5  | 2033.2  | 2215.2  | 2125.7  | 2140.3  | 2227.5  | 2028.5  | 1623.7  | 1449.7  | 1917.4  | 2608.6  | 1978.4  | 1553.5  | 2963.3  | 692.4   | 1304.2 | 144.6   | 1105.2  | 1901.9  | 1148.2  |
| 4106    | 6992.3  | 5827.8  | 5054.5  | 6258.4  | 5049.8  | 5747.8  | 3053.4  | 6584.2  | 6025.9  | 6759.4  | 6831.9  | 5132    | 6364    | 4763.9  | 6149.4  | 3845.1  | 2934.1 | 3065.8  | 4377.5  | 2453.6  | 4567.9  |
| 4816.9  | 3268.9  | 3537.5  | 1491.8  | 3614.5  | 2644.9  | 4753    | 4656.6  | 7545.5  | 2056    | 4580.4  | 4219.8  | 3730.6  | 5089.8  | 4010.2  | 2942.6  | 3860.6  | 2638.8 | 3093.1  | 1521.5  | 1920.1  | 2718.1  |
| 2184.6  | 2251.5  | 1950.7  | 2786.4  | 2747.7  | 1594.5  | 2188    | 2282.5  | 2856.5  | 1900.6  | 2863.6  | 2409.9  | 2358.3  | 1836.9  | 2421.4  | 2229.3  | 1619    | 1410.8 | 1978.7  | 2269.4  | 1585.6  | 1382.2  |
| 3509.4  | 5418.7  | 6260.4  | 2495.9  | 1539.5  | 2143.8  | 2912.2  | 2437.4  | 3289.3  | 3390.4  | 2979.2  | 3320.4  | 2903.8  | 4096.8  | 3857.1  | 1905.9  | 1232    | 715.5  | 1108.5  | 1044.6  | 597.3   | 1187.6  |
| 2370.5  | 3069.2  | 3200.3  | 3433.2  | 2977.2  | 3002.5  | 2503.3  | 2247.8  | 2014.1  | 2793.6  | 3286.8  | 2325.4  | 2985.2  | 2065.7  | 2851.6  | 2285.1  | 1146.2  | 649.7  | 1036.5  | 1105.6  | 837.2   | 766.5   |
| 3712.6  | 3142    | 3824.6  | 2347.6  | 3419.6  | 2768.1  | 4967.2  | 2966.1  | 3977.7  | 2463    | 3411.9  | 5612.4  | 2795.8  | 5042.9  | 4025.5  | 5588.9  | 2377.1  | 2019.4 | 1007.8  | 2581.2  | 2425.3  | 2490.1  |
| 1909.4  | 1957.1  | 1321.7  | 839     | 935.1   | 866.5   | 2376.3  | 1138.3  | 2523.8  | 1350.1  | 1361.7  | 2834.4  | 2684.8  | 2385.2  | 873.1   | 2241.9  | 736.7   | 286    | 1343.2  | 771.3   | 518.7   | 1565    |
| 877.9   | 474.5   | 339.1   | 885.5   | 1002.7  | 774.7   | 528.2   | 683     | 983.4   | 631.4   | 952.3   | 768.4   | 1171.7  | 707.7   | 831.6   | 866.4   | 301.5   | 348.8  | 392.8   | 491.3   | 887     | 469.6   |
| 8195.4  | 10371.2 | 10420.9 | 11813.7 | 15506.6 | 14242.6 | 11503.9 | 9891.1  | 11233   | 10101.3 | 17067.4 | 8122.3  | 27316.8 | 6201.8  | 10630.3 | 14651.2 | 8073    | 6562.2 | 6098.9  | 7152.3  | 10855.7 | 5247.3  |
| 1289.5  | 1272.8  | 1033.3  | 1102.6  | 904.5   | 854.9   | 1662.8  | 1002.6  | 1773.7  | 1096.2  | 823.3   | 1108.3  | 1208.2  | 1651.4  | 875     | 901.6   | 1607.6  | 685.9  | 851.7   | 663.9   | 667.2   | 1058.5  |
| 1691.3  | 1566.5  | 1845.8  | 582.5   | 1327    | 579.2   | 1351.1  | 1209.1  | 1564.5  | 1546.7  | 439     | 1723.4  | 735.8   | 1629    | 519.1   | 1628.4  | 733.8   | 576.9  | 280.9   | 1188.7  | 1017.6  | 1481.7  |
| 4705.8  | 5996.7  | 6078.8  | 3079.6  | 2569.5  | 4891    | 4263.6  | 2529.7  | 3935.8  | 3267.8  | 4677.9  | 2763.6  | 2613.1  | 2792.5  | 2976.6  | 2725.9  | 2097.9  | 2326.6 | 1669.6  | 1379.2  | 1686.9  | 2518.8  |
| 30575.2 | 58878.9 | 31911.7 | 32048.9 | 36320.7 | 38264.3 | 45299.8 | 45781   | 52424.4 | 41683.7 | 55157.2 | 72152.3 | 59346.8 | 72985.9 | 41290.6 | 48147.6 | 37190.4 | 5612.9 | 16757.8 | 33274.1 | 19865.5 | 26350.6 |
| 2220.7  | 1664.6  | 1298    | 1078    | 1726.4  | 1425.4  | 1342.9  | 1757.3  | 1495.1  | 1702.5  | 2120.3  | 1305.4  | 861     | 1017.1  | 1316.2  | 1859.7  | 1878.7  | 963    | 549.9   | 475.9   | 717.2   | 1104.5  |
| 1111.6  | 1871.3  | 1294.5  | 1239.4  | 1465.7  | 909.1   | 1646.5  | 1091.1  | 1877.4  | 722.7   | 1453.5  | 987.6   | 756.3   | 1577.9  | 752.2   | 1470.7  | 1070.5  | 1009.5 | 238.9   | 521.2   | 1214.9  | 970.2   |
| 5480.8  | 5668.6  | 4503.8  | 4400.7  | 5291.7  | 5301    | 8998.6  | 4280.3  | 4747.5  | 6353.4  | 6109.3  | 5620.7  | 3831.3  | 7844.1  | 4721.9  | 5458    | 3542.9  | 1973.8 | 2196.1  | 3786.4  | 3001.7  | 4104.8  |
| 1425    | 1732.9  | 1526.5  | 1592.1  | 1942.9  | 2412.6  | 2387.2  | 1255.5  | 2545.9  | 1563.8  | 1465    | 2181.5  | 1476.1  | 1548.6  | 908.1   | 2206.1  | 1095.8  | 786.2  | 314.1   | 1016.6  | 917.8   | 1359    |
| 15419   | 13310.7 | 11680.2 | 17222.2 | 13970.3 | 15240.9 | 18135.1 | 13225.1 | 14204.6 | 14051.4 | 12219.3 | 14647.6 | 14322.6 | 15224.3 | 13915.8 | 11234.4 | 8627.7  | 7091.5 | 8055.8  | 6312.9  | 7685    | 6038.2  |
| 2560.9  | 1823.2  | 2241.4  | 2901.9  | 3160.6  | 2534.6  | 2303    | 2201.9  | 1596.1  | 2416.4  | 1936.5  | 1733.5  | 3096.4  | 2293.6  | 2471.1  | 3239.6  | 705.5   | 746.7  | 456.1   | 555.8   | 557.6   | 528.5   |
| 2660.7  | 2958.8  | 3225.3  | 3869.2  | 3716.6  | 2132.6  | 2828.7  | 1742.6  | 2856.5  | 2654.9  | 2982.9  | 3088.7  | 3059.5  | 2895.3  | 1661.9  | 3776.2  | 1696.3  | 1413.5 | 506.6   | 963.3   | 1876.9  | 1398.9  |
| 1628.6  | 1995.1  | 1481    | 1948.8  | 1310.4  | 1021.4  | 2673.8  | 1368    | 2311.1  | 1553.1  | 1741.4  | 1855.7  | 1932    | 1530.7  | 1384.2  | 1642.3  | 1155.8  | 1268.6 | 1052.5  | 256     | 1226    | 1675    |
| 221.2   | 1293.5  | 1317.4  | 211     | 1388.8  | 478.4   | 1111    | 602.1   | 1133.5  | 139.8   | 613.4   | 1063.4  | 781.5   | 229.5   | 1064.8  | 215.4   | 612.3   | 709.1  | 136.9   | 211.8   | 327.2   | 150.5   |
| 1908.4  | 2362.3  | 2540.4  | 1561.3  | 2743.4  | 1037.8  | 1804.9  | 1901.1  | 3275.3  | 1671.2  | 2420.1  | 2583.4  | 2256.1  | 2436.4  | 2641    | 2236.9  | 2829.3  | 1450.9 | 1898.7  | 721.9   | 1563.6  | 2233.6  |
| 6281.2  | 5024.7  | 6596.6  | 8798.4  | 5632.9  | 5244.7  | 7808.2  | 3986.5  | 4710.6  | 7109.8  | 5122.5  | 6125.7  | 6062.8  | 5911.2  | 4414    | 7149.4  | 2647.1  | 3241.5 | 901.2   | 2276.5  | 2721.9  | 2238.6  |
| 1863.4  | 1591.9  | 1736.2  | 1823.8  | 2139.2  | 1410.1  | 1908.2  | 1582.5  | 2467.6  | 1812.7  | 1141.1  | 1521.6  | 1528.5  | 1436.1  | 1554    | 2565.3  | 956.5   | 1051   | 719     | 502.5   | 1170.3  | 1340.2  |
| 1800.1  | 1873.3  | 1347.8  | 2026.7  | 1485.7  | 1007.4  | 1493    | 1386.9  | 1616.3  | 1622.7  | 1191.7  | 1695.5  | 1890.7  | 1565    | 1177.8  | 2117.5  | 1020.7  | 778.4  | 169     | 407.7   | 1082.3  | 736.5   |
| 3633    | 2899.1  | 2755.8  | 2814.2  | 5393.3  | 3564.8  | 3922.5  | 3885.5  | 3830.1  | 2495.7  | 3370.4  | 3517.2  | 3919.7  | 3137.8  | 2927.2  | 3587.2  | 2029.9  | 1673.4 | 1237.9  | 3114.9  | 1981.9  | 2425.7  |
| 12220.2 | 16406.3 | 14473   | 9031.5  | 8966.1  | 13222.6 | 20170.4 | 12365.9 | 26236.9 | 8587.4  | 10459.1 | 15650.1 | 13819.3 | 14833.5 | 12714.5 | 11515.4 | 7103.1  | 7000   | 8535.8  | 7063.6  | 5129.1  | 8577.2  |
| 4849.9  | 3984.7  | 4340.4  | 4060.1  | 3666.9  | 4058.4  | 4782.6  | 3137.9  | 6731.8  | 3821.7  | 4171.8  | 4987.4  | 4028.2  | 4177.4  | 2112.8  | 2797.3  | 3822.7  | 3930.5 | 4262.4  | 1920.3  | 2002.4  | 2857.4  |
| 3119.3  | 2595.4  | 3301.8  | 3454.3  | 2647.3  | 2756.2  | 3650.5  | 2434    | 3641.1  | 2772.9  | 3967.2  | 2214.1  | 2069.1  | 2783.2  | 2160.6  | 2799.2  | 1770.1  | 1781.7 | 1352.5  | 2813.1  | 1589.2  | 1309.3  |
| 2294.7  | 2238.3  | 2173.4  | 1351.4  | 2322.6  | 2193.9  | 2868.2  | 2242.4  | 2643.1  | 1764.9  | 1846.4  | 1555.8  | 1318.7  | 1917.3  | 1518.2  | 1962.5  | 1584.1  | 679.8  | 1202    | 1614.9  | 1904.5  | 2034.4  |
| 3458.1  | 2558    | 3843.9  | 1810.1  | 2614.1  | 3453    | 2145.7  | 1016.5  | 4714.5  | 1590.3  | 2666    | 4793.7  | 4082.7  | 3595.8  | 905.5   | 2949.2  | 1772.6  | 1539.6 | 2357.6  | 1469.9  | 396     | 1390.7  |
| 220     | 668.4   | 764.6   | 377.9   | 574.8   | 374.5   | 481.9   | 476.5   | 1259.4  | 925.1   | 391.1   | 584.5   | 584.8   | 877.9   | 665.5   | 553     | 178.5   | 637.7  | 270.2   | 397     | 166.9   | 228.3   |
| 2077.1  | 3020    | 5077.8  | 2196.7  | 2130.1  |         |         |         |         |         |         |         |         |         |         |         |         |        |         |         |         |         |

|          |         |          |          |         |         |         |         |          |          |         |         |          |         |          |         |         |         |         |         |         |         |
|----------|---------|----------|----------|---------|---------|---------|---------|----------|----------|---------|---------|----------|---------|----------|---------|---------|---------|---------|---------|---------|---------|
| 5820.2   | 9606.1  | 7341.1   | 6910     | 3842.7  | 3534.4  | 6202.9  | 3966.6  | 7798.7   | 3120.5   | 4719.3  | 9242    | 4116.7   | 6750.2  | 4054.4   | 4204    | 6293.5  | 4612.3  | 1362    | 716.3   | 761.9   | 2208.7  |
| 4257     | 5775.8  | 8845     | 5196.7   | 8175.8  | 7173    | 7255.9  | 6476.5  | 8655.1   | 4797.8   | 5873.6  | 5564.9  | 2754.4   | 4410    | 3352.9   | 3228.2  | 4041.1  | 3521.4  | 1377.8  | 3377.9  | 2608.8  | 4154.3  |
| 1076.9   | 916.3   | 550      | 1164.5   | 990.5   | 630     | 715     | 1013.2  | 825.9    | 659.6    | 1395.5  | 983.9   | 807.7    | 954.7   | 1085.1   | 1265.6  | 624     | 425.5   | 122.6   | 886.8   | 525.3   | 617.4   |
| 1356.8   | 1115.6  | 1133.7   | 1685     | 1687.9  | 1536.5  | 1183.1  | 1549.2  | 1117.5   | 1185.3   | 473.1   | 1221.2  | 1208.9   | 1419.7  | 979      | 1598.6  | 986.1   | 529.2   | 149.7   | 1670.3  | 590.5   | 742     |
| 2924.1   | 2635.5  | 2235.3   | 1788.9   | 3343.2  | 2150.1  | 2252.6  | 2317.8  | 2612.5   | 2122.4   | 2771.2  | 2320.5  | 1813.6   | 2431.9  | 1296.7   | 3144.5  | 2318    | 1743.9  | 344.4   | 1022.5  | 1099    | 1179.3  |
| 1605.8   | 2128.1  | 1725     | 2122.1   | 1738.4  | 2385.7  | 1931    | 1509.4  | 2183.7   | 2580     | 1881.5  | 2817    | 3123.8   | 2160.6  | 1625     | 3966    | 1434.6  | 700.3   | 1632.4  | 1350.9  | 540.9   | 804.7   |
| 11929.6  | 13073.8 | 19347.5  | 14426.3  | 16545.6 | 12558.2 | 18325.6 | 17659.2 | 15218    | 14389.3  | 15376.3 | 13591.8 | 13436.7  | 12512.7 | 14964.8  | 9615.2  | 11704.5 | 12210.2 | 12423.2 | 7133.9  | 10845.3 | 10534.3 |
| 1890.2   | 2487.4  | 1866     | 1707.7   | 1772.3  | 1789.2  | 1953.3  | 1765.4  | 4203.2   | 2007.2   | 2834.7  | 1984.9  | 1586.9   | 2122.7  | 1918.9   | 2310.6  | 1311.9  | 494.4   | 295.1   | 1746.1  | 717.8   | 1187.4  |
| 1796     | 2755.4  | 1468.3   | 1590.1   | 1571.9  | 1481.7  | 2468.2  | 1399.2  | 2517.9   | 1184.9   | 1884.5  | 1618.7  | 2010.5   | 1784.6  | 2198.7   | 2138.5  | 683     | 435.8   | 685.7   | 105.2   | 768.6   | 872.7   |
| 8864     | 10148.1 | 12687.2  | 6677.3   | 11208.7 | 10235.4 | 9671.6  | 7615.2  | 9087.2   | 10048.8  | 7967.4  | 9714.4  | 8041.4   | 11261.9 | 9074.1   | 8348.2  | 8298.2  | 5354.1  | 5379.2  | 7109.7  | 5875.8  | 9714.2  |
| 2371.8   | 2976.8  | 1987     | 1494.3   | 2258.9  | 2323.4  | 2935.1  | 2119.7  | 2914.2   | 2529.7   | 2535.8  | 1366.6  | 1472.6   | 1252.6  | 1103     | 1244.1  | 858     | 1004.2  | 362.6   | 568.4   | 620.3   | 918.3   |
| 101851.9 | 99489.9 | 125651.3 | 113381.6 | 96863.5 | 92541.7 | 69521.9 | 84777.3 | 105605.1 | 106492.9 | 90183.4 | 102337  | 113428.4 | 98577.3 | 106527.3 | 90012.5 | 67869.8 | 69191.2 | 66013.6 | 61496.5 | 69061.1 | 63069.7 |
| 18195.4  | 18978.9 | 20165.1  | 14949.9  | 16591.8 | 13124.5 | 22433.7 | 15698.5 | 27040.2  | 15674.6  | 16128.5 | 14192.3 | 12642.9  | 16243   | 13282.4  | 15815.4 | 11861   | 12611.8 | 7943.7  | 7254    | 9672.5  | 13863.2 |
| 2234.9   | 2326.7  | 2453.4   | 1785.8   | 3256.4  | 1344.3  | 2507.9  | 2501.2  | 4023.8   | 1252.6   | 2419.6  | 2837.9  | 2840.3   | 2360    | 1846.2   | 3151    | 1787.4  | 1373.6  | 564.2   | 1616    | 1525.2  | 1331.3  |
| 1093.5   | 774.7   | 980.1    | 558.6    | 906.4   | 1016.9  | 807.9   | 498.3   | 1308.2   | 1024.6   | 463.7   | 665.5   | 351.4    | 669.9   | 718.5    | 474.1   | 673.2   | 564.9   | 412     | 595.7   | 571.4   | 663.1   |
| 13185.7  | 9486.7  | 11543.4  | 5556.1   | 4284.7  | 14031   | 10548.5 | 14760.7 | 13317    | 20073.9  | 5391.1  | 19410.3 | 15403.5  | 17345.2 | 5883     | 9087.2  | 12627.7 | 9289.9  | 2829.3  | 9205.9  | 5182.8  | 2635.9  |
| 503.8    | 329.6   | 726.8    | 709.7    | 436.5   | 395.1   | 698.4   | 318.9   | 585.8    | 303      | 104.3   | 745.9   | 356.5    | 438.1   | 250.2    | 156.1   | 595.8   | 48.1    | 179.2   | 205.3   | 64.8    | 101.9   |
| 23284.6  | 28910.4 | 33213.8  | 14821.3  | 13632.4 | 15890.9 | 22751.2 | 12540.5 | 30627.8  | 10566.4  | 25955.6 | 17490.2 | 11028.2  | 16876.8 | 15834.7  | 10456.3 | 12170.4 | 12369.8 | 13694.5 | 6451.2  | 13085   | 17760   |
| 9533.1   | 10671.4 | 9257.6   | 8199.8   | 10975.3 | 8994.1  | 10801   | 10150.2 | 15265.6  | 11288    | 8838    | 12368.7 | 12353    | 10180.5 | 8906.6   | 9818.8  | 13523.4 | 8253.5  | 6229.4  | 6394.7  | 5308.8  | 6722.1  |
| 2295.3   | 1980.4  | 2943.7   | 3222.1   | 2038.3  | 1435.5  | 1809.1  | 1276.8  | 3606.2   | 1329.6   | 1766.1  | 3054.5  | 1079.9   | 2366.2  | 1839.7   | 1312.7  | 1215.6  | 1089.6  | 1298.7  | 1540.8  | 1482.6  | 2038.8  |
| 19311    | 19451.5 | 23065.7  | 11162.4  | 23517.8 | 19881.5 | 23875.9 | 20447.9 | 20095.8  | 16441.6  | 17867.9 | 30035.5 | 23309.7  | 27337.2 | 18546.4  | 21245.9 | 12855.4 | 16044.4 | 9568    | 14507.2 | 17673.5 | 12810.2 |
| 3148.3   | 1686    | 1978.7   | 2133.3   | 2118.5  | 1552.2  | 2283.9  | 1195.1  | 2604.2   | 2549.4   | 3081.2  | 2034.5  | 1967.5   | 1630.4  | 1775     | 1569.4  | 1219.6  | 1089.5  | 838.7   | 474.8   | 1549.1  | 1390.1  |
| 3070.7   | 3918.9  | 5386.2   | 3903     | 4153    | 5523.4  | 6119.4  | 5022    | 4844.2   | 3723.8   | 6050.2  | 4289.4  | 6340.2   | 4172.6  | 3654.4   | 6521.5  | 2774.4  | 1945.3  | 2525    | 2933.6  | 4307.2  | 3977.4  |
| 2881.9   | 2869.4  | 3953.7   | 2713.3   | 4606.7  | 2827.1  | 2857.4  | 1920.4  | 3186.2   | 1720.4   | 1907.9  | 3723.4  | 1823.8   | 3143.7  | 1608.2   | 2428.1  | 1487.2  | 720.3   | 1132.8  | 588.5   | 529.5   | 1035    |
| 3730     | 2222.5  | 2768.1   | 3500.3   | 3381.7  | 2095.8  | 3554.8  | 3041.4  | 2802.2   | 2346.2   | 3193.6  | 2096.2  | 3069     | 2915.6  | 3075.4   | 2418.2  | 1701.2  | 992     | 908.2   | 2576.8  | 972.1   | 3265    |
| 6565.5   | 3560.7  | 7684.6   | 3731.2   | 3491.2  | 3406.3  | 3594.7  | 7586.5  | 3009     | 6013.6   | 4695.7  | 3795.8  | 2496     | 4585.9  | 4524.5   | 1187.4  | 2926.7  | 2395.7  | 1258.5  | 1651.9  | 2548.1  | 2204.1  |
| 1989.5   | 1347.3  | 1377.2   | 2090     | 1368    | 1310.8  | 1416.4  | 808.2   | 1988.7   | 1702.4   | 1587.5  | 1379.4  | 1471.6   | 1056.8  | 1527.6   | 1811.5  | 1259.2  | 1049.5  | 972.7   | 1588.8  | 1488.8  | 1040.7  |
| 2795     | 2378.1  | 1460.6   | 2441.1   | 1411.1  | 1384    | 1803.5  | 1831.6  | 2866.4   | 1804.6   | 3446.3  | 1367.4  | 2595.6   | 1778.4  | 1950.9   | 1873.3  | 1687.2  | 1037.6  | 2086.7  | 886.9   | 1369.3  | 1640.6  |
| 3077.8   | 3635.4  | 4401     | 2872.4   | 3124.6  | 2349.5  | 2055.1  | 1937.1  | 3890.8   | 3750.4   | 1971.3  | 3926.3  | 1994.2   | 3298.7  | 1804.4   | 3466.6  | 1803.6  | 1431.9  | 1373.5  | 145.6   | 1233.9  | 1417.9  |
| 938.9    | 616.4   | 624.8    | 1036.1   | 322.8   | 286.6   | 432.6   | 75.8    | 524.7    | 441.2    | 429.8   | 839     | 704.1    | 207.2   | 312.6    | 265.4   | 96.3    | 96.7    | 133.8   | 637.1   | 114.6   | 294.5   |
| 986      | 1277    | 1152.2   | 1398.7   | 1030.1  | 766.7   | 1105.5  | 937.7   | 1110.8   | 943.5    | 1784    | 1196.4  | 1303.5   | 1876.7  | 1000.4   | 1463.5  | 456.8   | 179.6   | 122.9   | 1425.7  | 540.6   | 656.9   |
| 812.4    | 1458.5  | 1129.8   | 845.3    | 1083.7  | 856.5   | 1002    | 1013.5  | 1364.1   | 976.7    | 1556.7  | 1347.7  | 1087.6   | 1470.4  | 852.4    | 794.5   | 655.5   | 623.1   | 265.9   | 304.7   | 633.1   | 932.5   |
| 2157.2   | 2605.9  | 2593.7   | 1525.3   | 2100.3  | 1558    | 2580.5  | 2180.2  | 2351     | 2613.8   | 1931.5  | 1811.3  | 1769.5   | 2108.8  | 1533.4   | 2050.3  | 1579.8  | 741.2   | 1187    | 1174.7  | 1328.8  | 2582.9  |
| 1644.9   | 1720.4  | 2540.3   | 2117.8   | 1503.1  | 2646    | 2255.9  | 650.6   | 3080.4   | 2313.5   | 2892.7  | 2219.9  | 663.2    | 1580.2  | 403.5    | 920     | 616.8   | 489.7   | 924.2   | 618.5   | 462.1   | 435.9   |
| 1812.6   | 1978.7  | 2231.5   | 1256.2   | 1674.9  | 1726.8  | 1994.5  | 1951.7  | 1092.7   | 2085.2   | 1977.8  | 1145.7  | 739.1    | 1245.7  | 1271.5   | 1143.2  | 1301.3  | 723.4   | 285.4   | 409.1   | 565.6   | 1382.3  |
| 1412.7   | 1569.2  | 1546     | 1746.9   | 1502.3  | 1555    | 1380    | 1261    | 2067.5   | 1222     | 1374.1  | 1706.6  | 1097.7   | 1692.1  | 1143.5   | 1741.7  | 1242.3  | 547.3   | 1170.7  | 244.5   | 535.5   | 1597.2  |
| 576      | 1123.5  | 460.2    | 1071.3   | 457.3   | 98.5    | 598.9   | 778.7   | 897.6    | 510.7    | 745.8   | 1374.4  | 1010.8   | 1056.4  | 614.3    | 637.6   | 724     | 24.8    | 155.4   | 123.5   | 104.1   | 71.4    |
| 473.6    | 524.8   | 984.5    | 663.3    | 488.6   | 845.9   | 713.9   | 567.8   | 679.7    | 745.9    | 576.1   | 1182    | 1312.6   | 529.5   | 959.1    | 993.1   | 699.1   | 122.9   | 166.2   | 290.5   | 670.2   | 488.8   |
| 1384.6   | 1796.7  | 1954.5   | 1298.4   | 1249    | 1364.6  | 1348.4  | 980.5   | 1603.5   | 1927.7   | 3032.3  | 1128.7  | 365.8    | 1401.1  | 1192.4   | 779.7   | 641.9   | 780.1   | 1021.4  | 614     | 350.6   | 507.1   |
| 2324.6   | 2166.3  | 3203     | 3333.7   | 2520.9  | 2421.9  | 2253.5  | 1886.2  | 2862.7   | 2007.2   | 1841.8  | 1992.2  | 2175.8   | 1148.2  | 1635     | 1232.4  | 1485.3  | 1146.9  | 721.8   | 1040.9  | 1305.5  | 1824.9  |
| 2158.2   | 1484.9  | 1403.1   | 1548.7   | 1694.9  | 1655.6  | 1242.1  | 1828    | 2500.7   | 1480     | 1835.7  | 1678.2  | 1743.6   | 1564.1  | 2212.2   | 2023.7  | 848.7   | 720.7   | 298.4   | 1857    | 1140.3  | 1869.9  |
| 1491     | 1329.7  | 456.2    | 1045.9   | 1127.1  | 988.4   | 1109.6  | 1399.1  | 1479.5   | 1178.9   | 1102.5  | 1494.1  | 1755.3   | 1067.5  | 1393.2   | 1526.7  | 1198.7  | 490.3   | 233.3   | 1273.7  | 762.2   | 423.3   |
| 1592.5   | 1604    | 1429.3   | 1668     | 1450.1  | 1651.5  | 1299.6  | 826.4   | 1568     | 1288.8   | 2397    | 1704.5  | 1483.5   | 1428.8  | 1638.1   | 1689    | 1000.1  | 468.9   | 387.5   | 1479.7  | 986.8   | 1446.2  |
| 7325.6   | 8783    | 11701.4  | 4311.8   | 8251.1  | 8280.4  | 8534    | 7588    | 5936.7   | 9321.1   | 6080.4  | 9329.7  | 8264     | 9765    | 6309.7   | 5100.6  | 4921.8  | 3736    | 2443.4  | 3141.9  | 2663.3  | 6688.9  |
| 2436.6   | 2873    | 1737.1   | 3892.8   | 2815.1  | 2714    | 1891.2  | 1949.4  | 3820.6   | 4801.9   | 4332.5  | 2353    | 6816.6   | 1994.6  | 4019.5   | 3798.1  | 2513.6  | 1068.1  | 721.6   | 2456.8  | 1607.3  | 1280    |
| 1808.8   | 1939.8  | 1442.7   | 2706.8   | 1346.3  | 701.2   | 723.3   | 1143.8  | 2111     | 1511.8   | 894.2   | 1258.4  | 1222.8   | 1454.3  | 1286.8   | 2110    | 1579    | 796.5   | 632     | 818.7   | 863.5   | 933.6   |
| 926.1    | 1741.5  | 1167.5   | 1085.6   | 1772.5  | 1255.5  | 1262    | 946.6   | 1391.5   | 1242.9   | 1627.8  | 1270    | 848.8    | 1376.8  | 1193     | 1781.5  | 848.8   | 500.5   | 504.4   | 547.8   | 676.9   | 934.4   |
| 1465.3   | 1412    | 1804.8   | 604.1    | 2101.2  | 1345.4  | 1792    | 875.9   | 1836.5   | 1602.3   | 1488.2  | 1220    | 2331.4   | 1840.4  | 1407.3   | 1804.1  | 1011.6  | 456.3   | 1223.4  | 1142.9  | 1097.2  | 1181.9  |
| 3700.6   | 3573.5  | 3302.1   | 2873.9   | 3126.7  | 3624.4  | 3830.1  | 2736.1  | 5752.4   | 2623.6   | 4711.3  | 4262.2  | 4077.4   | 3870.3  | 3784     | 3043.4  | 1721.7  | 1250.4  | 1200.9  | 1951    | 2087.8  | 2546.4  |
| 2609.3   | 3719.1  | 3638     | 2438.8   | 4117.4  | 3834.2  | 4646.9  | 2729.6  | 3606.4   | 3224.4   | 3688.8  | 3221.2  | 2926.3   | 3244.2  | 2924.7   | 3610.8  | 1934    | 1832.5  | 1608.2  | 1438    | 2698.3  | 2678.9  |
| 2038.3   | 2027.3  | 2217.8   | 1696.4   | 1817.3  | 1762.3  | 2041.8  | 1116.8  | 2003.2   | 1247.5   | 1264.5  | 1591.4  | 1773.3   | 1820.8  | 1040.6   | 1801.9  | 1085.8  | 811.5   | 1108.7  | 1136.5  | 658.8   | 1858.8  |

| PSA7    | PSA8    | PSA9    | PSA10   | PSA11   | PSA12   | PSA13   | PSA14   | PSA15   | PSA16   | PSA17   | PSA18  | PSA19  | Description                                                                                    |
|---------|---------|---------|---------|---------|---------|---------|---------|---------|---------|---------|--------|--------|------------------------------------------------------------------------------------------------|
| 1855.1  | 1576.3  | 3071.3  | 2812.1  | 2666.6  | 2819    | 3833.9  | 2269.9  | 2157.4  | 1695.4  | 2101.1  | 1001.7 | 375.3  | Consensus includes gb:BF663461 /FEA=EST /DB_XREF=gi:11937356 /DB_XREF=est:602144623            |
| 265.9   | 244     | 613.5   | 204.7   | 211.5   | 930.5   | 494.4   | 251.3   | 113.7   | 41.8    | 667.6   | 222.3  | 311.5  | gb:BC002477.1 /DEF=Homo sapiens, clone MGC:3090, mRNA, complete cds. /FEA=mRNA /PROC           |
| 2002.1  | 2429    | 3272.9  | 2483.6  | 2518.6  | 2309.4  | 2028.2  | 2248.9  | 2955.1  | 1206.2  | 1625.9  | 907.7  | 796.3  | Cluster Incl. W72694:zd68f10.s1 Homo sapiens cDNA, 3 end /clone=IMAGE-345835 /clone_end=3      |
| 2630.7  | 1677.6  | 1576.5  | 1402.4  | 1967.4  | 1944.9  | 1220.2  | 2528.6  | 2265.4  | 561.4   | 1409.1  | 222.2  | 472.9  | Consensus includes gb:W89120 /FEA=EST /DB_XREF=gi:1404482 /DB_XREF=est:zh69b03.s1 /Cl          |
| 8230.3  | 11780.5 | 16572.2 | 14776.2 | 8636.7  | 5435    | 20779.4 | 12482.8 | 20392.4 | 8164.2  | 12650.4 | 3309.3 | 8197.5 | Consensus includes gb:AI445650 /FEA=EST /DB_XREF=gi:4289772 /DB_XREF=est:tj08g03.x1 /Cl        |
| 491.1   | 759.3   | 806.2   | 826.7   | 770.5   | 554     | 676.5   | 1487.8  | 1014.6  | 2130    | 934     | 649.2  | 1654.1 | gb:BC002448.1 /DEF=Homo sapiens, Similar to actin binding LIM protein 1, clone MGC:1224, mRNA  |
| 2261.1  | 1838.3  | 3763.6  | 3714.1  | 2118.4  | 3600    | 4139.4  | 3191.9  | 4073.6  | 2183.3  | 3340.9  | 678.2  | 473.7  | gb:NM_004092.2 /DEF=Homo sapiens enoyl Coenzyme A hydratase, short chain, 1, mitochondrial     |
| 3532.7  | 4468.9  | 3469.4  | 5250.4  | 3087.4  | 4851.3  | 4406.6  | 6595.4  | 4253.7  | 10657.3 | 9611.3  | 1172.7 | 4852.5 | Consensus includes gb:N25915 /FEA=EST /DB_XREF=gi:1140263 /DB_XREF=est:yx87a02.s1 /CL          |
| 1538.7  | 1589.8  | 2398.3  | 3294.6  | 1490.6  | 2056.1  | 3104.8  | 4313.4  | 2976.8  | 3994    | 5782.6  | 627.7  | 5183.5 | Consensus includes gb:BF431488 /FEA=EST /DB_XREF=gi:11443602 /DB_XREF=est:7o14f01.x1           |
| 3670    | 4789.1  | 4982.5  | 8070.5  | 2858.7  | 5242.8  | 2681.8  | 4643.6  | 5602.2  | 754.2   | 786.7   | 815.1  | 302    | gb:NM_004356.1 /DEF=Homo sapiens CD81 antigen (target of antiproliferative antibody 1) (CD81), |
| 770.4   | 1063.6  | 1196.8  | 1939.7  | 1454.6  | 1385.4  | 1553.5  | 2719.8  | 1607    | 52.7    | 1021.6  | 1270   | 506.4  | gb:NM_021805.1 /DEF=Homo sapiens single Ig IL-1R-related molecule (SIGIRR), mRNA. /FEA=mF      |
| 723     | 1323.2  | 1243.4  | 1100.3  | 600.3   | 1389    | 1516.1  | 1701.8  | 1964.3  | 1962.5  | 1324.9  | 2342.8 | 1015.4 | gb:NM_025092.1 /DEF=Homo sapiens hypothetical protein FLJ22635 (FLJ22635), mRNA. /FEA=m        |
| 1134.5  | 2061.9  | 1661.7  | 1414.6  | 762.5   | 1143.1  | 1796    | 1426.4  | 1947.4  | 2007.9  | 1158.3  | 288.8  | 623.7  | gb:NM_012402.1 /DEF=Homo sapiens partner of RAC1 (arfaptin 2) (POR1), mRNA. /FEA=mRNA /I       |
| 170     | 59.5    | 172.9   | 420.7   | 86.9    | 562.6   | 811.9   | 150.1   | 258     | 189.9   | 28      | 169.8  | 82.9   | gb:NM_017490.1 /DEF=Homo sapiens ELKL motif kinase (EMK1), transcript variant 1, mRNA. /FEA    |
| 1815.7  | 1563.2  | 3014.9  | 2109.5  | 2935.7  | 2935.6  | 3017.4  | 2903.3  | 2761.1  | 2092.4  | 2110.3  | 124.2  | 1363   | Consensus includes gb:BE222618 /FEA=EST /DB_XREF=gi:8909936 /DB_XREF=est:hu49a11.x1 /          |
| 3999.5  | 3106.6  | 4143.4  | 4345.7  | 4696.4  | 4620.8  | 5180.3  | 7071.2  | 4745.2  | 2613.2  | 4061.1  | 951.2  | 1572.1 | gb:BC004904.1 /DEF=Homo sapiens, nuclear RNA export factor 1, clone MGC:4612, mRNA, comp       |
| 4064.5  | 4754.9  | 5653.5  | 3861.6  | 3099.4  | 5980.4  | 3262.6  | 5652.5  | 3417.1  | 1481.7  | 1713.7  | 402.2  | 536.6  | Cluster Incl. AI201594:qc02h12.x1 Homo sapiens cDNA, 3 end /clone=IMAGE-1708487 /clone_end     |
| 401.4   | 271.8   | 823.1   | 1486.7  | 646.1   | 1266.6  | 417.5   | 699.9   | 785.6   | 617.1   | 487.4   | 89.9   | 994.7  | gb:NM_006328.1 /DEF=Homo sapiens RNA binding motif protein 14 (RBM14), mRNA. /FEA=mRN/         |
| 4778    | 1869.2  | 5474.1  | 3889    | 4764    | 3005.5  | 5529.3  | 6167.9  | 4603.2  | 735.8   | 1558    | 256.1  | 1197.2 | Consensus includes gb:NM_001335.1 /DEF=Homo sapiens cathepsin W (lymphopain) (CTSW), mF        |
| 2292.2  | 1750.2  | 2829.9  | 2396.4  | 3796.8  | 2531.1  | 3160.1  | 1903.2  | 1922.5  | 56.6    | 233.4   | 158.6  | 665.6  | gb:NM_006747.1 /DEF=Homo sapiens signal-induced proliferation-associated gene 1 (SIPA1), mRl   |
| 4407.2  | 4145.8  | 3956.6  | 4400.5  | 5970.9  | 3405.4  | 4793.7  | 8814.1  | 5749.5  | 2135    | 2586.1  | 1154.4 | 1445   | gb:NM_004630.1 /DEF=Homo sapiens zinc finger protein 162 (ZNF162), mRNA. /FEA=mRNA /GEI        |
| 3148.9  | 2236    | 3703.6  | 5687.6  | 4547.3  | 4406.7  | 2413.3  | 4278.3  | 2849.1  | 1372.2  | 90.2    | 280.9  | 334.5  | gb:NM_005825.1 /DEF=Homo sapiens RAS guanyl releasing protein 2 (calcium and DAG-regulatec     |
| 1375.8  | 917.4   | 1297.9  | 1244.6  | 556.3   | 1140.1  | 846.5   | 1154.9  | 853.3   | 38.3    | 827.8   | 260.1  | 246.4  | gb:NM_005851.1 /DEF=Homo sapiens tumor suppressor deleted in oral cancer-related 1 (DOC-1R)    |
| 169.7   | 2870.7  | 3879.4  | 3145.7  | 3580.3  | 4669.8  | 2729.5  | 2684.9  | 2917.3  | 1734.2  | 2727.2  | 145.3  | 1834.5 | gb:NM_006268.2 /DEF=Homo sapiens requiem, apoptosis response zinc finger gene (REQ), mRN/      |
| 851.9   | 1209.5  | 1319.1  | 1281.3  | 956.8   | 1129.2  | 544     | 644.5   | 1048.9  | 256.4   | 1494    | 216.4  | 864    | gb:NM_002105.1 /DEF=Homo sapiens H2A histone family, member X (H2AFX), mRNA. /FEA=mRN          |
| 257.9   | 818.8   | 650.1   | 1912.7  | 587.4   | 1184.2  | 531.3   | 1128.2  | 654.5   | 1885.3  | 342.7   | 287.9  | 1295.3 | gb:NM_001716.1 /DEF=Homo sapiens Burkitt lymphoma receptor 1, GTP-binding protein (BLR1), n    |
| 297     | 1165.7  | 1284.4  | 935.3   | 1105.9  | 600.5   | 2098.4  | 1505.1  | 1405.6  | 1515.7  | 1081.6  | 286    | 1575.3 | Consensus includes gb:AA704766 /FEA=EST /DB_XREF=gi:2714684 /DB_XREF=est:zj34h05.s1 /I         |
| 71.2    | 364.1   | 225.2   | 1730.5  | 241.1   | 1260    | 218.3   | 1148.4  | 143     | 257     | 757.4   | 448.5  | 133.3  | gb:NM_014026.1 /DEF=Homo sapiens HSPC015 protein (HSPC015), mRNA. /FEA=mRNA /GEN=i             |
| 9470.5  | 11946.9 | 9588.6  | 12387.2 | 10967.7 | 10208.1 | 10257.2 | 14312   | 10516.3 | 4743.2  | 13054.2 | 3004.8 | 2353   | gb:NM_007273.1 /DEF=Homo sapiens B-cell associated protein (REA), mRNA. /FEA=mRNA /GEN:        |
| 3393.6  | 4606.3  | 4525.7  | 6844.2  | 3771.4  | 5488.3  | 3194.2  | 8407.4  | 6506    | 2579    | 2242    | 309.9  | 2174.8 | gb:NM_001242.1 /DEF=Homo sapiens tumor necrosis factor receptor superfamily, member 7 (TNF)    |
| 249.1   | 1247.1  | 1785.1  | 976.8   | 348.1   | 1693.7  | 464.5   | 1308.6  | 1928.3  | 130.8   | 148.6   | 800.8  | 209.2  | gb:NM_004426.1 /DEF=Homo sapiens early development regulator 1 (homolog of polyhomeotic 1)     |
| 11926.3 | 12708   | 18885.7 | 15423   | 15768.6 | 17077.7 | 9097    | 10194.7 | 6062.6  | 16027.7 | 10194.1 | 2191.2 | 9367.4 | gb:NM_002831.1 /DEF=Homo sapiens protein tyrosine phosphatase, non-receptor type 6 (PTPN6),    |
| 586.3   | 2378.8  | 3117.8  | 3045.9  | 1103.6  | 3143.7  | 4006    | 4810.8  | 3306.7  | 696.8   | 3095.2  | 4185.2 | 3342.1 | gb:NM_001273.1 /DEF=Homo sapiens chromodomain helicase DNA binding protein 4 (CHD4), mRl       |
| 502.1   | 921.1   | 572.5   | 1203.6  | 541.7   | 499.3   | 955.5   | 1675.2  | 1060.5  | 1091.3  | 895.1   | 100.7  | 534    | gb:NM_001975.1 /DEF=Homo sapiens enolase 2, (gamma, neuronal) (ENO2), mRNA. /FEA=mRN/          |
| 1153.2  | 779.1   | 772.7   | 657.6   | 959.6   | 351     | 1633.8  | 731.8   | 719.3   | 883.3   | 957.4   | 928.6  | 1334.8 | Consensus includes gb:AA772285 /FEA=EST /DB_XREF=gi:2824068 /DB_XREF=est:ai42d11.s1 /I         |
| 748.6   | 1014.6  | 1077.3  | 333.3   | 753.1   | 339     | 1947.7  | 644.3   | 1279.7  | 601.2   | 1448.3  | 902.1  | 1347.9 | gb:NM_024095.1 /DEF=Homo sapiens hypothetical protein MGC5540 (MGC5540), mRNA. /FEA=r          |
| 510.1   | 1526.5  | 2397.1  | 3612.4  | 343.4   | 3540.5  | 2217.8  | 3677.6  | 2731.7  | 4479.6  | 3274.3  | 501.8  | 2339.4 | gb:BC004998.1 /DEF=Homo sapiens, Similar to membrane bound C2 domain containing protein, cl    |
| 2408.4  | 2378.6  | 2145.3  | 2556.3  | 881.5   | 2330    | 2484    | 3222.8  | 2784.3  | 1937.8  | 2475.8  | 108.1  | 2053.8 | gb:NM_015416.1 /DEF=Homo sapiens DKFZP586A011 protein (DKFZP586A011), mRNA. /FEA=m             |
| 1114.9  | 1522.4  | 2140.1  | 2397.3  | 452.6   | 1920    | 437.5   | 1342.1  | 505.7   | 174.7   | 249.4   | 133.5  | 342.7  | gb:NM_004818.1 /DEF=Homo sapiens prp28, U5 snRNP 100 kd protein (U5-100K), mRNA. /FEA=r        |
| 1261.9  | 1618.9  | 2040    | 2064.2  | 2098.7  | 1412.3  | 1915.3  | 1693.8  | 2276.5  | 1269.2  | 2327.9  | 340.7  | 1956   | gb:NM_014938.1 /DEF=Homo sapiens KIAA0867 protein (MONDOA), mRNA. /FEA=mRNA /GEN=i             |
| 916.4   | 1466.4  | 1659.4  | 1157.5  | 1439.4  | 1578.7  | 1186.8  | 909.1   | 1199.1  | 1618.2  | 1147.4  | 787    | 2186.9 | Consensus includes gb:D86973.1 /DEF=Human mRNA for KIAA0219 gene, partial cds. /FEA=mRN        |
| 2084.2  | 2915.6  | 2760.7  | 4610.7  | 3088.2  | 3277.4  | 4271.6  | 6558.1  | 7221.3  | 2696.4  | 4035.5  | 2116   | 1118.2 | Consensus includes gb:BE969671 /FEA=EST /DB_XREF=gi:10582604 /DB_XREF=est:601679610            |
| 728.8   | 831.4   | 799     | 1591.3  | 432.2   | 1051.6  | 1050    | 1115.1  | 1460.9  | 39.6    | 379.2   | 761.8  | 88.1   | gb:NM_016433.1 /DEF=Homo sapiens glycolipid transfer protein (LOC51228), mRNA. /FEA=mRNA       |
| 1160.9  | 1216.7  | 585.4   | 730.4   | 864.1   | 1080.5  | 829.1   | 2046.2  | 1517.8  | 4273.6  | 4197.7  | 2403.5 | 5448.8 | Consensus includes gb:AW117498 /FEA=EST /DB_XREF=gi:6086082 /DB_XREF=est:xd92e10.x1            |
| 1607.3  | 1940.1  | 2706.7  | 2771.3  | 1527.8  | 2139.9  | 2089.4  | 3415.9  | 2253.7  | 1355.3  | 2934.5  | 3446.1 | 2561   | Consensus includes gb:AI347090 /FEA=EST /DB_XREF=gi:4084296 /DB_XREF=est:qp60d11.x1 /I         |
| 1213.5  | 1403.8  | 1283.4  | 1638.3  | 1334.9  | 1754.2  | 1477    | 2404.1  | 2906.1  | 2053.5  | 1737.6  | 480.1  | 1203.5 | Consensus includes gb:AU130523 /FEA=EST /DB_XREF=gi:10990877 /DB_XREF=est:AU130523             |
| 1474.4  | 1907.9  | 2007.7  | 2643.3  | 1200.8  | 2669.5  | 1842.9  | 2083.2  | 2561.5  | 1586.7  | 3613.2  | 2320.6 | 2475.2 | gb:NM_015180.1 /DEF=Homo sapiens synaptic nuclei expressed gene 2; KIAA1011 protein (KIAA1     |
| 1592.5  | 1477.1  | 1669.5  | 1675.9  | 1642.4  | 1696.1  | 936.9   | 1323.7  | 1492    | 1364.6  | 1038.3  | 256.7  | 525.3  | Consensus includes gb:S72422.1 /DEF=E2k=alpha-ketoglutarate dehydrogenase complex dihydroli    |
| 380.2   | 360.5   | 450.6   | 1653.2  | 412.5   | 1027.3  | 351.3   | 583.5   | 1081.4  | 1168.1  | 116.6   | 182.4  | 1765.1 | Consensus includes gb:AW134608 /FEA=EST /DB_XREF=gi:6138154 /DB_XREF=est:UI-H-BI1-ab           |
| 3314.1  | 6038.8  | 4685.2  | 14459.2 | 5102    | 9441.5  | 6373.7  | 5898.8  | 7511.3  | 5325.5  | 2094.3  | 1747.7 | 3900.1 | Consensus includes gb:X17115.1 /DEF=Human mRNA for IgM heavy chain complete sequence. /FI      |

|         |         |         |         |         |         |         |         |         |         |         |        |         |                                                                                                |
|---------|---------|---------|---------|---------|---------|---------|---------|---------|---------|---------|--------|---------|------------------------------------------------------------------------------------------------|
| 1410.1  | 486.6   | 998.8   | 886.6   | 608.8   | 869.1   | 1461.6  | 1760    | 1338.9  | 1026.2  | 654.3   | 1820.6 | 950.5   | gb:NM_024892.1 /DEF=Homo sapiens hypothetical protein FLJ11700 (FLJ11700), mRNA. /FEA=m        |
| 2893.4  | 4949.1  | 3569    | 4684.6  | 4273.7  | 4508    | 3128    | 7365.3  | 5779    | 5398.6  | 6614.6  | 1255.9 | 5900    | gb:NM_016337.1 /DEF=Homo sapiens RNB6 (RNB6), mRNA. /FEA=mRNA /GEN=RNB6 /PROD=F                |
| 797.7   | 947.9   | 1328.4  | 1098.4  | 548.6   | 973.4   | 785.3   | 1413.5  | 1625.6  | 318.4   | 525.5   | 816.3  | 864.4   | gb:BC006177.1 /DEF=Homo sapiens, Similar to metastasis associated 1, clone MGC:13258, mRNA     |
| 219.7   | 190.3   | 495.5   | 485.5   | 144.3   | 188.2   | 155     | 170.4   | 164.9   | 307.6   | 128.4   | 446.5  | 271.3   | gb:NM_002757.1 /DEF=Homo sapiens mitogen-activated protein kinase kinase 5 (MAP2K5), mRNA      |
| 1066.3  | 1071.5  | 156.4   | 1309.8  | 940.4   | 647.3   | 1100.2  | 449.1   | 499.2   | 954.9   | 1382.2  | 271.2  | 255.9   | gb:NM_021823.1 /DEF=Homo sapiens hypothetical protein MDS018 (MDS018), mRNA. /FEA=mRNA         |
| 593.3   | 615.9   | 925.5   | 1496.5  | 558.1   | 984.2   | 919.9   | 866.6   | 757.3   | 890.1   | 396.1   | 721    | 662.5   | Cluster Incl. AA907940:ol24e02.s1 Homo sapiens cDNA, 3 end /clone=IMAGE-1524410 /clone_en      |
| 9839.1  | 6450.7  | 9912.1  | 8446.2  | 10191.3 | 10596.3 | 12516.9 | 11405.1 | 10504.8 | 12100.3 | 15285.6 | 3069.5 | 14759.6 | gb:M13975.1 /DEF=Homo sapiens protein kinase C beta-II type (PRKCB1) mRNA, complete cds. /I    |
| 1500    | 1577.6  | 2078.3  | 1596.6  | 3333.1  | 1760.7  | 2062.9  | 2703.1  | 1767    | 2656    | 2647.7  | 877.7  | 101     | gb:NM_003807.1 /DEF=Homo sapiens tumor necrosis factor (ligand) superfamily, member 14 (TNF    |
| 1048.2  | 2406    | 1219.6  | 2068.5  | 2243.1  | 1883.4  | 1523.1  | 1925.1  | 1753.6  | 811.8   | 2067.6  | 180.6  | 611.6   | gb:NM_024031.1 /DEF=Homo sapiens hypothetical protein MGC3121 (MGC3121), mRNA. /FEA=rr         |
| 589.6   | 1298.2  | 1176.4  | 1068    | 1103.9  | 1400.2  | 1077    | 1100    | 1377.9  | 172.8   | 163.5   | 219.1  | 227.9   | Consensus includes gb:NM_006662.1 /DEF=Homo sapiens Snf2-related CBP activator protein (SR     |
| 396     | 176.9   | 587.6   | 454.3   | 572.7   | 908.6   | 695.2   | 146.7   | 604.1   | 77.4    | 318.7   | 85.2   | 75.6    | gb:NM_022744.1 /DEF=Homo sapiens hypothetical protein FLJ13868 (FLJ13868), mRNA. /FEA=m        |
| 890.8   | 754.5   | 1301.9  | 1268.2  | 690.1   | 1542.1  | 653.8   | 1427    | 563     | 122     | 1167.1  | 292.2  | 375     | gb:NM_000294.1 /DEF=Homo sapiens phosphorylase kinase, gamma 2 (testis) (PHKG2), mRNA. /I      |
| 3047.7  | 2002.3  | 2908.7  | 2373.3  | 3524.9  | 3374.5  | 2429.6  | 2357.8  | 2520.6  | 3939.6  | 2992.4  | 1532.1 | 2364.8  | Consensus includes gb:AB011116.1 /DEF=Homo sapiens mRNA for KIAA0544 protein, partial cds.     |
| 412.7   | 475.6   | 1164.8  | 657.1   | 237.8   | 724.4   | 2465.3  | 2314.2  | 1625.2  | 1483.8  | 2093.9  | 239.1  | 455     | gb:NM_002613.1 /DEF=Homo sapiens 3-phosphoinositide dependent protein kinase-1 (PDPK1), ml     |
| 969.2   | 893.6   | 1034.7  | 899.9   | 1076    | 632.1   | 810.2   | 1569.7  | 520     | 601.4   | 401.8   | 561.6  | 171.7   | gb:NM_024339.1 /DEF=Homo sapiens hypothetical protein MGC2655 (MGC2655), mRNA. /FEA=rr         |
| 683.9   | 762.7   | 753.8   | 796     | 698.4   | 555.8   | 1606.8  | 804.6   | 807.4   | 1301    | 1507    | 113.5  | 1612    | Consensus includes gb:AI871396 /FEA=EST /DB_XREF=gi:5545445 /DB_XREF=est:w181f07.x1 /C         |
| 1508.3  | 936.8   | 1213.2  | 2036.2  | 1760.7  | 1768    | 980.3   | 924.6   | 230.9   | 205.7   | 128.7   | 229.8  | 120.9   | gb:NM_024535.1 /DEF=Homo sapiens hypothetical protein FLJ22021 (FLJ22021), mRNA. /FEA=m        |
| 1165.8  | 1659.9  | 1758.7  | 2591    | 2358.8  | 2793.3  | 1858    | 2300.8  | 3545    | 787.5   | 869.8   | 82.3   | 739.7   | gb:U85430.1 /DEF=Human transcription factor NFATx4 mRNA, complete cds. /FEA=mRNA /PROD         |
| 621.5   | 1508.9  | 1826.8  | 3598.2  | 571.9   | 1878.8  | 660.1   | 2938.2  | 1294.8  | 1839.4  | 3178.8  | 1429.9 | 1741.3  | L41690 /FEATURE= /DEFINITION=HUMTRADD Homo sapiens TNF receptor-1 associated protein           |
| 1192.4  | 1037    | 928.4   | 1136.4  | 1659.8  | 1115.4  | 1849.3  | 830.5   | 2019.3  | 1669.3  | 1373.4  | 874.8  | 941.9   | gb:NM_012091.2 /DEF=Homo sapiens adenosine deaminase, tRNA-specific 1 (ADAT1), mRNA. /FI       |
| 206.4   | 309     | 765.2   | 1129.7  | 306.8   | 703.5   | 854.4   | 1148    | 862.6   | 72.8    | 207.6   | 165.2  | 149     | Consensus includes gb:AI629033 /FEA=EST /DB_XREF=gi:4665833 /DB_XREF=est:ty79g04.x1 /C         |
| 1036.9  | 965.1   | 1107.4  | 2437.6  | 496.2   | 1515.9  | 1552.5  | 4517    | 836     | 212.4   | 837.8   | 396.4  | 443.1   | gb:NM_014745.1 /DEF=Homo sapiens KIAA0233 gene product (KIAA0233), mRNA. /FEA=mRNA /I          |
| 488     | 774     | 539.1   | 1497.1  | 851.2   | 1633.3  | 1100.3  | 1458.1  | 1420.2  | 78      | 802.8   | 149.6  | 130.2   | gb:NM_003119.1 /DEF=Homo sapiens spastic paraplegia 7, paraplegin (pure and complicated auto   |
| 639     | 2055.8  | 2307.5  | 2035.8  | 2421.5  | 2340.8  | 1571.7  | 2407    | 2103.2  | 1910.2  | 1640.6  | 258    | 234     | Consensus includes gb:NM_005200.1 /DEF=Homo sapiens cell matrix adhesion regulator (CMAR),     |
| 2440.1  | 3282.1  | 2355    | 2486.4  | 2038.1  | 2480.8  | 2614.7  | 3625.2  | 3594.6  | 260.6   | 1415.7  | 1207.4 | 310.7   | gb:NM_000485.1 /DEF=Homo sapiens adenine phosphoribosyltransferase (APRT), mRNA. /FEA=n        |
| 225.3   | 134.4   | 128.7   | 803.7   | 201.9   | 360.9   | 168.5   | 929.1   | 199.3   | 438.9   | 374     | 236    | 1939.1  | gb:NM_005679.1 /DEF=Homo sapiens TATA box binding protein (TBP)-associated factor, RNA pol     |
| 2157.3  | 3102.5  | 4238.5  | 3547.2  | 1200.5  | 3366.9  | 855.7   | 1059.5  | 1269.7  | 613.4   | 660.9   | 137.6  | 207.1   | Consensus includes gb:Y15724 /DEF=Homo sapiens SERCA3 gene, exons 1-7 (and joined CDS) /I      |
| 104.2   | 326.2   | 456.4   | 891.3   | 87.1    | 649.6   | 616.5   | 1027.4  | 590     | 131.6   | 806.4   | 1264   | 852.2   | gb:NM_013337.1 /DEF=Homo sapiens translocase of inner mitochondrial membrane 22 (yeast) hor    |
| 292.9   | 136.7   | 575.3   | 1047.9  | 466.7   | 532.5   | 326.3   | 1031.1  | 277     | 941.8   | 90.5    | 296.7  | 133     | gb:NM_015670.1 /DEF=Homo sapiens sentrinSUMO-specific protease 3 (SEN3), mRNA. /FEA=m          |
| 365.2   | 1444.8  | 1192.6  | 1857.4  | 740.7   | 1100.2  | 444.3   | 1971.8  | 1119.9  | 181     | 857.9   | 174    | 554.5   | gb:NM_014185.1 /DEF=Homo sapiens HSPC165 protein (HSPC165), mRNA. /FEA=mRNA /GEN=I             |
| 273.5   | 341.4   | 1100.3  | 1067.5  | 640.1   | 928.2   | 1096.7  | 790.4   | 424.8   | 735.5   | 577.6   | 139.9  | 207.4   | gb:NM_004937.1 /DEF=Homo sapiens cystinosis, nephropathic (CTNS), mRNA. /FEA=mRNA /GEN         |
| 1284.2  | 2185    | 2480.3  | 3127.2  | 2004.7  | 2884    | 1463.9  | 2462.5  | 2071.6  | 2918.8  | 1519.3  | 1233   | 491.5   | gb:NM_006445.1 /DEF=Homo sapiens U5 snRNP-specific protein (220 kD), ortholog of S. cerevisia  |
| 1493.6  | 1314.5  | 2885.1  | 2245.1  | 1161.9  | 1507.4  | 1105.5  | 1198.2  | 243.9   | 420.1   | 363.4   | 126.7  | 469.1   | gb:NM_005173.1 /DEF=Homo sapiens ATPase, Ca++ transporting, ubiquitous (ATP2A3), mRNA. /f      |
| 740.1   | 1065.4  | 1364.4  | 1607.4  | 1243.1  | 374.5   | 1295.5  | 1554.1  | 1251    | 1870.5  | 1623.2  | 124.3  | 954.6   | gb:NM_025099.1 /DEF=Homo sapiens hypothetical protein FLJ22170 (FLJ22170), mRNA. /FEA=m        |
| 858.7   | 2035    | 1561.6  | 2643.2  | 764.5   | 3024.8  | 776.9   | 4380    | 1377.3  | 895.1   | 1912.9  | 538.5  | 542.2   | gb:NM_020360.1 /DEF=Homo sapiens phospholipid scramblase 3 (PLSCR3), mRNA. /FEA=mRNA           |
| 203.1   | 471.9   | 1248.6  | 766.5   | 472.3   | 304     | 366     | 485.2   | 133.8   | 153.8   | 53.3    | 54.8   | 34.6    | gb:K03199.1 /DEF=Human p53 cellular tumor antigen mRNA, complete cds. /FEA=mRNA /GEN=TF        |
| 975.5   | 2202.5  | 3251.5  | 3137.5  | 1312.2  | 3031.1  | 2399.5  | 3036.3  | 1980.6  | 748.3   | 176.2   | 138.5  | 41.9    | gb:NM_014680.1 /DEF=Homo sapiens KIAA0100 gene product (KIAA0100), mRNA. /FEA=mRNA /I          |
| 695.1   | 1012.1  | 348.9   | 716.4   | 1026.8  | 1466.7  | 1375.7  | 645.8   | 1265.4  | 138.1   | 2016.9  | 489.6  | 711.6   | Consensus includes gb:AL514271 /FEA=EST /DB_XREF=gi:12777765 /DB_XREF=est:AL514271 /           |
| 223.7   | 134     | 179     | 465.9   | 228.6   | 250.3   | 243.8   | 775.2   | 251.1   | 351.8   | 139.9   | 125.3  | 83      | gb:D79984.1 /DEF=Human mRNA for KIAA0162 gene, complete cds. /FEA=mRNA /GEN=KIAA016            |
| 18348.4 | 12773.8 | 23807.8 | 14375.2 | 25638.4 | 17790.8 | 16583.9 | 15087.6 | 23649.1 | 9348.1  | 10663.5 | 1735.6 | 8638.1  | Consensus includes gb:AA634272 /FEA=EST /DB_XREF=gi:2557486 /DB_XREF=est:ac75h05.s1 /          |
| 126.4   | 186.3   | 179.5   | 548.2   | 212.5   | 157.3   | 367.7   | 169.5   | 266.8   | 180     | 139.2   | 170.7  | 152.9   | Consensus includes gb:X03363.1 /DEF=Human c-erb-B-2 mRNA. /FEA=mRNA /DB_XREF=gi:3119           |
| 103.9   | 378.1   | 237.6   | 1818    | 161.1   | 207.2   | 64      | 766.8   | 786.1   | 115     | 211     | 600.1  | 57.7    | gb:BC003629.1 /DEF=Homo sapiens, clone MGC:2854, mRNA, complete cds. /FEA=mRNA /PROD           |
| 3058.3  | 2221.4  | 2981.7  | 3349.9  | 3297.6  | 2036    | 3542.1  | 2941.1  | 3197.5  | 2766    | 1241.5  | 2789.2 | 673.2   | gb:NM_013351.1 /DEF=Homo sapiens T-box 21 (TBX21), mRNA. /FEA=mRNA /GEN=TBX21 /PRC             |
| 1563.1  | 513.2   | 1582.8  | 1632.9  | 628.4   | 2559.5  | 572.8   | 2597.8  | 392.5   | 390.7   | 267.9   | 1206.4 | 994     | gb:AF308302.1 /DEF=Homo sapiens serologically defined breast cancer antigen NY-BR-96 mRNA,     |
| 919     | 1216.5  | 592.4   | 2042.6  | 680.2   | 1940.8  | 470.6   | 1412.7  | 955.9   | 2437.2  | 1127    | 1715   | 984.2   | gb:NM_000626.1 /DEF=Homo sapiens CD79B antigen (immunoglobulin-associated beta) (CD79B),       |
| 2759.8  | 2138.8  | 2520.3  | 2427.8  | 3900.4  | 2942.4  | 2790    | 2704.5  | 1907.2  | 3228.2  | 3698    | 1606.2 | 1367.4  | Consensus includes gb:BF971923 /FEA=EST /DB_XREF=gi:12339138 /DB_XREF=est:602240326I           |
| 817.3   | 1571.5  | 2243.7  | 2484    | 248.2   | 1656.6  | 229.7   | 2102.8  | 844.9   | 765.1   | 716.9   | 609.4  | 95.8    | gb:NM_016286.1 /DEF=Homo sapiens carbonyl reductase (LOC51181), mRNA. /FEA=mRNA /GEN           |
| 384.5   | 340.6   | 1149.1  | 592     | 539.1   | 128     | 1019    | 975.2   | 903.3   | 1687.8  | 1402.8  | 789.5  | 848.9   | gb:NM_002359.1 /DEF=Homo sapiens v-maf musculoaponeurotic fibrosarcoma (avian) oncogene f      |
| 1437.6  | 731.3   | 1002.8  | 1431.2  | 1342.1  | 1477.8  | 1099.5  | 2516.4  | 1018.5  | 173.9   | 1173.1  | 509.4  | 181.5   | gb:AF142408.1 /DEF=Homo sapiens cell division control protein septin D1 mRNA, complete cds. /f |
| 332.5   | 504.8   | 1036.7  | 971.3   | 1034.5  | 1561.5  | 1395.5  | 784.5   | 663.2   | 217.1   | 493.7   | 323.6  | 46.9    | gb:NM_024957.1 /DEF=Homo sapiens hypothetical protein FLJ22686 (FLJ22686), mRNA. /FEA=m        |
| 1628.2  | 776.2   | 3937.8  | 1521.8  | 2373.4  | 2228    | 1380.9  | 987.2   | 1268.3  | 191.7   | 496.9   | 745.1  | 160.5   | gb:NM_000152.2 /DEF=Homo sapiens glucosidase, alpha; acid (Pompe disease, glycogen storage     |
| 646.4   | 1480.7  | 1472.1  | 1834.4  | 61.8    | 1332.4  | 1870.4  | 1360.1  | 1670.9  | 167.1   | 1084.9  | 219.2  | 165.4   | gb:NM_014593.1 /DEF=Homo sapiens CpG binding protein (CGBP), mRNA. /FEA=mRNA /GEN=C            |



|         |         |         |         |         |         |         |         |         |         |         |        |         |                                                                                                  |
|---------|---------|---------|---------|---------|---------|---------|---------|---------|---------|---------|--------|---------|--------------------------------------------------------------------------------------------------|
| 850.3   | 738.3   | 453.5   | 792.1   | 481.8   | 376.9   | 403.4   | 1253.8  | 551.2   | 1024.3  | 1195.9  | 671.5  | 275     | Consensus includes gb:BE671156 /FEA=EST /DB_XREF=gi:10031697 /DB_XREF=est:7e46f09.x1             |
| 498.1   | 963.7   | 1882.5  | 1810.6  | 1068    | 1590.6  | 469.5   | 1894    | 377     | 366.5   | 1421.6  | 375    | 551.7   | gb:NM_016573.1 /DEF=Homo sapiens Gem-interacting protein (LOC51291), mRNA. /FEA=mRNA /           |
| 148.3   | 547.2   | 885.2   | 1232.8  | 159.6   | 844.5   | 180.2   | 1510.8  | 441.4   | 481.4   | 915.7   | 1897.9 | 839.2   | Consensus includes gb:BG252853 /FEA=EST /DB_XREF=gi:12762669 /DB_XREF=est:602365438              |
| 2610.4  | 1427.5  | 2421.9  | 1963.5  | 2718    | 1898.2  | 1253.7  | 1746.1  | 1122.9  | 1136.9  | 198.2   | 258.4  | 111.8   | gb:NM_004720.3 /DEF=Homo sapiens endothelial differentiation, lysophosphatidic acid G-protein-c  |
| 6205.5  | 6044.3  | 7493    | 9845.7  | 10218.7 | 12619.9 | 5909.2  | 10586.8 | 6182    | 8906.1  | 7982.8  | 8917.6 | 13184.8 | Consensus includes gb:AB011093.1 /DEF=Homo sapiens mRNA for KIAA0521 protein, partial cds.       |
| 1170.9  | 1170.9  | 1687.3  | 1743.1  | 1302.1  | 1757.8  | 1441.7  | 2039    | 1335.1  | 481.2   | 1159.9  | 362.6  | 728.4   | Consensus includes gb:BG258639 /FEA=EST /DB_XREF=gi:12768455 /DB_XREF=est:602380357              |
| 405.8   | 945.6   | 1029.3  | 1807.8  | 282.9   | 1602.6  | 202.8   | 860.5   | 1041.2  | 109.1   | 71.7    | 145.4  | 119.6   | gb:NM_004868.1 /DEF=Homo sapiens glycoprotein, synaptic 2 (GPSN2), mRNA. /FEA=mRNA /GE           |
| 881.4   | 921     | 1308.8  | 1476.1  | 1627.9  | 1035.9  | 1400.5  | 1305.9  | 1546    | 273.3   | 616     | 198.1  | 301     | gb:NM_005035.1 /DEF=Homo sapiens polymerase (RNA) mitochondrial (DNA directed) (POLRMT)          |
| 3244.6  | 2365.9  | 4331.6  | 2860.3  | 4693.8  | 3285.6  | 2374.4  | 2542.3  | 1797    | 1218.9  | 2582.7  | 528.1  | 1385.8  | Consensus includes gb:AB011133.1 /DEF=Homo sapiens mRNA for KIAA0561 protein, partial cds.       |
| 8415.2  | 5762.1  | 6970.2  | 4004.5  | 8882    | 6895.2  | 10796.3 | 6123.6  | 8833.5  | 8012.3  | 6775.6  | 1529.2 | 3892.8  | Consensus includes gb:BF718610 /FEA=EST /DB_XREF=gi:12019523 /DB_XREF=est:KEST81 /Cl             |
| 1676.7  | 1695.3  | 1642.7  | 2211.9  | 2176.7  | 1810.2  | 1276.9  | 1499.6  | 878.6   | 62.2    | 219.2   | 272.4  | 330.6   | gb:NM_001319.2 /DEF=Homo sapiens casein kinase 1, gamma 2 (CSNK1G2), mRNA. /FEA=mRN,             |
| 352.5   | 222.3   | 191.3   | 190.9   | 187.7   | 204.2   | 145.9   | 841.9   | 244.8   | 820.7   | 88.1    | 838.9  | 610.2   | gb:NM_005597.1 /DEF=Homo sapiens nuclear factor IC (CCAAT-binding transcription factor) (NFIC    |
| 211.4   | 1357.8  | 1842.2  | 954     | 1016.1  | 909.7   | 86.9    | 112.4   | 1061.2  | 91.2    | 95.8    | 103.2  | 90.2    | gb:BC002492.1 /DEF=Homo sapiens, hypothetical protein FLJ20244, clone MGC:1066, mRNA, cor        |
| 721.4   | 1322.6  | 2317.4  | 2059    | 2061.5  | 1950.5  | 895.2   | 2547.9  | 1353.3  | 303.7   | 814.1   | 219.5  | 454.8   | Cluster Incl. AI660497:we67h06.x1 Homo sapiens cDNA, 3 end /clone=IMAGE-2346203 /clone_en        |
| 2135.4  | 1507.3  | 1955.7  | 2241.5  | 543     | 2259.9  | 401.7   | 1648.9  | 1480.4  | 147.6   | 688.8   | 1765.7 | 859.1   | gb:BC003086.1 /DEF=Homo sapiens, hypothetical protein FLJ20011, clone MGC:1080, mRNA, cor        |
| 25441.3 | 27201.4 | 29274.3 | 26883.2 | 25799.1 | 32403.7 | 20367.1 | 54331.3 | 27571.8 | 10475.1 | 12438.2 | 2993.1 | 11959.4 | Consensus includes gb:AI004246 /FEA=EST /DB_XREF=gi:3213756 /DB_XREF=est:ou03g06.x1 /l           |
| 3138.2  | 3457    | 4877.5  | 3551    | 3311.1  | 3875.4  | 2121.6  | 3042.5  | 2165.7  | 1462.7  | 1060.3  | 609.8  | 1831    | Consensus includes gb:BF062886 /FEA=EST /DB_XREF=gi:10821796 /DB_XREF=est:7h71f04.x1             |
| 419.9   | 289.2   | 583.4   | 569.5   | 540.7   | 443.6   | 1180.3  | 769     | 643     | 188.9   | 52.5    | 96.3   | 108.2   | gb:NM_012346.1 /DEF=Homo sapiens nucleoporin 62kD (NUP62), mRNA. /FEA=mRNA /GEN=NU               |
| 465.7   | 358.3   | 354.9   | 893.2   | 531.7   | 359.6   | 898.4   | 850.9   | 564.3   | 242.1   | 1117.6  | 207.2  | 163.4   | gb:NM_014347.1 /DEF=Homo sapiens zinc finger protein (ZF5128), mRNA. /FEA=mRNA /GEN=ZF           |
| 1564.4  | 2188.9  | 2074.8  | 2450.5  | 2457.9  | 2815.6  | 2370.9  | 2811.9  | 2789    | 1810.9  | 1847.5  | 1497.3 | 1679.1  | Consensus includes gb:AA744529 /FEA=EST /DB_XREF=gi:2783293 /DB_XREF=est:ny79a04.s1 /            |
| 1837.2  | 2271.9  | 2501.9  | 2247.8  | 1977.3  | 2931.5  | 1787.5  | 2859.1  | 2822.3  | 269.3   | 1569.1  | 348.8  | 322.1   | gb:NM_004596.1 /DEF=Homo sapiens small nuclear ribonucleoprotein polypeptide A (SNRPA), mR       |
| 2653.3  | 3989.5  | 3088.6  | 4203.6  | 2772.9  | 2938.6  | 3389.8  | 3287.2  | 3078.9  | 872     | 2063    | 2969.6 | 1327.5  | gb:NM_003089.1 /DEF=Homo sapiens small nuclear ribonucleoprotein 70kD polypeptide (RNP anti      |
| 1784.2  | 1878.8  | 2856.8  | 2815.5  | 2133.3  | 2082.4  | 3700    | 2970.7  | 1910.2  | 66.7    | 518.5   | 1502.4 | 336.2   | gb:AF309082.1 /DEF=Homo sapiens protein kinase D2 mRNA, complete cds. /FEA=mRNA /PROD:           |
| 3599.4  | 3528.6  | 5363.9  | 4820.4  | 3296.6  | 4352.1  | 4582.5  | 5276.4  | 3091.3  | 1664.3  | 1161.5  | 671.6  | 1110.6  | gb:NM_000175.1 /DEF=Homo sapiens glucose phosphate isomerase (GPI), mRNA. /FEA=mRNA /l           |
| 407.6   | 297.9   | 979.6   | 1663.1  | 845.1   | 344.2   | 1961.7  | 1142.5  | 1134.3  | 1532.9  | 149.4   | 1266.5 | 63.1    | Consensus includes gb:BF110434 /FEA=EST /DB_XREF=gi:10940124 /DB_XREF=est:7n52h07.x1             |
| 999.3   | 1043    | 1368.7  | 2964.7  | 926.9   | 1259.3  | 1176.8  | 1118.2  | 1510.2  | 860.7   | 602.4   | 1845.6 | 1027.2  | gb:NM_003121.1 /DEF=Homo sapiens Spi-B transcription factor (Spi-1PU.1 related) (SPIB), mRNA     |
| 3044.6  | 2039.9  | 1637.4  | 3085.8  | 1812.7  | 1920.5  | 2487.2  | 1797.1  | 2179    | 383.3   | 1252.5  | 382.8  | 681.5   | gb:NM_001571.1 /DEF=Homo sapiens interferon regulatory factor 3 (IRF3), mRNA. /FEA=mRNA /C       |
| 360.8   | 385.3   | 782.8   | 692.4   | 396.3   | 490     | 347.9   | 569.2   | 293.1   | 99.9    | 92.2    | 461.5  | 558.8   | gb:NM_003422.1 /DEF=Homo sapiens zinc finger protein 42 (myeloid-specific retinoic acid- respons |
| 5580.8  | 11749.5 | 12670.8 | 16340.7 | 7862.8  | 3624    | 17356.6 | 11827.6 | 20757.6 | 834.8   | 4325.4  | 1667.3 | 906.4   | Consensus includes gb:NM_005601.1 /DEF=Homo sapiens natural killer cell group 7 sequence (NK     |
| 564     | 821.5   | 356.5   | 636.5   | 221.9   | 814.6   | 1219.5  | 1589.1  | 878.2   | 331.3   | 123.5   | 373.8  | 160.3   | gb:NM_000234.1 /DEF=Homo sapiens ligase I, DNA, ATP-dependent (LIG1), mRNA. /FEA=mRNA            |
| 3058.9  | 2784.3  | 3826.8  | 3832.4  | 2127.4  | 2161.1  | 2044.1  | 2337    | 1987.6  | 855.8   | 854.1   | 604.9  | 93.6    | gb:NM_005762.1 /DEF=Homo sapiens KRAB-associated protein 1 (TIF1B), mRNA. /FEA=mRNA /C           |
| 2614.3  | 2233.2  | 3338.7  | 4954.2  | 1541    | 3911.9  | 3152.7  | 4391.7  | 3572.7  | 1172.6  | 1309.7  | 106.1  | 843.5   | gb:NM_000701.1 /DEF=Homo sapiens ATPase, Na+K+ transporting, alpha 1 polypeptide (ATP1A1)        |
| 146.1   | 166.3   | 170.5   | 244     | 127.6   | 188.5   | 509.6   | 777.2   | 257.2   | 89.3    | 143.1   | 77.9   | 107.7   | gb:M58581.1 /DEF=Human carnitine palmitoyltransferase (CPT1) mRNA, complete cds. /FEA=mRN        |
| 766.9   | 794.2   | 928.5   | 594.3   | 818.3   | 464.5   | 1979.8  | 1810    | 2039.1  | 662.3   | 1562.2  | 1169.4 | 976.3   | gb:NM_003243.1 /DEF=Homo sapiens transforming growth factor, beta receptor III (betaglycan, 30l  |
| 25149.2 | 13250.1 | 22233.8 | 21529.6 | 25904.5 | 21386.7 | 21982.4 | 25063   | 19004.4 | 29059.9 | 34429.1 | 7450.9 | 24285.3 | Consensus includes gb:AA806142 /FEA=EST /DB_XREF=gi:2874892 /DB_XREF=est:oe29d06.s1 /            |
| 1073.8  | 806.7   | 1080.3  | 945.5   | 271.7   | 242.7   | 1222.9  | 1911.7  | 1392.3  | 2149.4  | 1684.7  | 211.6  | 842.9   | Consensus includes gb:BG403834 /FEA=EST /DB_XREF=gi:13297282 /DB_XREF=est:602419675              |
| 467.9   | 371.5   | 479.8   | 360.5   | 567.5   | 494.3   | 1358.7  | 684.1   | 605.1   | 120.9   | 789.7   | 58.7   | 38.5    | gb:NM_023923.1 /DEF=Homo sapiens hypothetical protein FLJ13171 (FLJ13171), mRNA. /FEA=m          |
| 4592.4  | 7591.4  | 6734.2  | 13465.6 | 4639.6  | 6563.2  | 4761.5  | 11140.5 | 10622   | 9233.2  | 13130.6 | 2666.8 | 10544.9 | gb:NM_005356.1 /DEF=Homo sapiens lymphocyte-specific protein tyrosine kinase (LCK), mRNA. /      |
| 1265.5  | 780     | 749.7   | 1397.1  | 1067    | 1345.8  | 1560.1  | 775.5   | 1387.2  | 1022.5  | 1629.6  | 119.3  | 239.3   | gb:NM_003790.1 /DEF=Homo sapiens tumor necrosis factor receptor superfamily, member 12 (tran     |
| 247.8   | 754.9   | 1353.5  | 1822.9  | 1572.6  | 1877.4  | 1115.6  | 1364.2  | 906.8   | 122.5   | 852.6   | 1888.7 | 1294.2  | gb:NM_002744.2 /DEF=Homo sapiens protein kinase C, zeta (PRKCZ), mRNA. /FEA=mRNA /GEN            |
| 1913.5  | 2771.2  | 2674.5  | 3506    | 1852.7  | 3040.5  | 1322.8  | 3359.9  | 5111.7  | 277.3   | 1333.5  | 340.1  | 766.6   | Consensus includes gb:AL545035 /FEA=EST /DB_XREF=gi:12877516 /DB_XREF=est:AL545035 /             |
| 1007.9  | 1238.3  | 1189.6  | 1773    | 1676.7  | 1529.1  | 1061.3  | 531.6   | 1906.5  | 65.5    | 160.5   | 120.8  | 1177.9  | gb:NM_004753.1 /DEF=Homo sapiens short-chain dehydrogenasereductase 1 (SDR1), mRNA. /FE          |
| 603.2   | 457.9   | 783     | 1162.8  | 676.4   | 936.8   | 799.8   | 833.8   | 536.7   | 149.7   | 40.8    | 105.2  | 67.8    | gb:NM_005341.1 /DEF=Homo sapiens GLI-Kruppel family member HKR3 (HKR3), mRNA. /FEA=m             |
| 1477.2  | 1733.6  | 1282.3  | 1013.8  | 939.2   | 1307.7  | 1477.1  | 2087.6  | 1307.4  | 1324.1  | 1227.2  | 1818   | 1275    | gb:NM_014179.1 /DEF=Homo sapiens HSPC157 protein (HSPC157), mRNA. /FEA=mRNA /GEN=H               |
| 2330.9  | 2613    | 3176.9  | 3971.1  | 2530.4  | 2152.4  | 5338.7  | 3579    | 4118.8  | 4201.4  | 6274.9  | 3577.9 | 4934.4  | Consensus includes gb:AA541630 /FEA=EST /DB_XREF=gi:2288064 /DB_XREF=est:ni99e01.s1 /l           |
| 72.5    | 168.6   | 430.4   | 417.3   | 216.9   | 587.4   | 341.7   | 165.9   | 97.9    | 69.7    | 370.8   | 208.5  | 217.1   | gb:NM_022089.1 /DEF=Homo sapiens putative ATPase (HSA9947), mRNA. /FEA=mRNA /GEN=H:              |
| 999.5   | 1426.8  | 1489    | 1473.8  | 1681.8  | 1412    | 397.9   | 2541.8  | 1901.2  | 1560.6  | 1098.2  | 1847.3 | 1596.3  | Consensus includes gb:AL582804 /FEA=EST /DB_XREF=gi:12951151 /DB_XREF=est:AL582804 /             |
| 1783.7  | 1377.3  | 2188.9  | 2220.4  | 2131.8  | 1926.5  | 1886.4  | 2886.3  | 2328.6  | 1502.9  | 3358.6  | 285.1  | 1562.8  | gb:NM_003993.1 /DEF=Homo sapiens CDC-like kinase 2 (CLK2), transcript variant phclk2, mRNA.      |
| 2716.7  | 10850.5 | 7418.6  | 14290.1 | 3621.4  | 6169.6  | 6122.6  | 13970.4 | 10287.9 | 5404.9  | 3935.3  | 2452.6 | 2878.1  | gb:J04132.1 /DEF=Human T cell receptor zeta-chain mRNA, complete cds. /FEA=mRNA /PROD=T          |
| 1730.4  | 853.8   | 1706    | 1470.5  | 1277    | 1672.6  | 1650.7  | 2022.5  | 1645.2  | 98      | 1686.7  | 285.6  | 953     | gb:NM_015726.1 /DEF=Homo sapiens H326 (H326), mRNA. /FEA=mRNA /GEN=H326 /PROD=H3                 |
| 2792.4  | 2143.5  | 3161.9  | 3473    | 2170    | 2860.5  | 3516.2  | 2399.6  | 4040.7  | 2382.4  | 2152.7  | 1466.7 | 2292    | gb:NM_003874.1 /DEF=Homo sapiens CD84 antigen (leukocyte antigen) (CD84), mRNA. /FEA=mF          |
| 6240.5  | 7887.6  | 7302.1  | 10941.4 | 7712.9  | 10070.9 | 7515.8  | 9441.2  | 11278.6 | 9421.9  | 7794    | 2999   | 12067.1 | Consensus includes gb:AI084226 /FEA=EST /DB_XREF=gi:3422649 /DB_XREF=est:oy72g09.x1 /l           |



|         |         |         |         |         |         |         |         |         |         |         |        |         |                                                                                                 |
|---------|---------|---------|---------|---------|---------|---------|---------|---------|---------|---------|--------|---------|-------------------------------------------------------------------------------------------------|
| 1330.8  | 1179.5  | 1803.7  | 2074.2  | 1634.8  | 1435.3  | 2357.1  | 1672.3  | 2760.8  | 1146.7  | 1406.1  | 678.9  | 763.7   | gb:NM_017773.1 /DEF=Homo sapiens hypothetical protein FLJ20340 (FLJ20340), mRNA. /FEA=m         |
| 820.2   | 1034.3  | 1225.9  | 1494    | 982.6   | 792.4   | 2167.8  | 2070.1  | 3035.9  | 1258.2  | 554.7   | 312.9  | 101.5   | Consensus includes gb:AB007958.1 /DEF=Homo sapiens mRNA, chromosome 1 specific transcript       |
| 4322.2  | 8588.5  | 6687.3  | 7116.5  | 5915.4  | 5542.5  | 5019.5  | 8425    | 7036.4  | 4461.1  | 5972    | 2203.2 | 2777.6  | gb:NM_021873.1 /DEF=Homo sapiens cell division cycle 25B (CDC25B), transcript variant 3, mRN/   |
| 6339.6  | 7578.2  | 6839.1  | 7775.9  | 6022.3  | 8569.6  | 6367.8  | 9237.3  | 7885.1  | 2329.7  | 2443.6  | 1384.9 | 1145.4  | gb:AF141349.1 /DEF=Homo sapiens beta-tubulin mRNA, complete cds. /FEA=mRNA /PROD=beta-          |
| 6573.5  | 4302.3  | 5741.7  | 4702.5  | 6570.3  | 4572.2  | 5526.3  | 3553.4  | 5404    | 2669    | 6049.9  | 1621.1 | 619.3   | gb:BC000213.1 /DEF=Homo sapiens, ring finger protein 24, clone MGC:1815, mRNA, complete cds     |
| 181.3   | 217.9   | 47.6    | 478.5   | 266.6   | 187.5   | 129.1   | 254.5   | 195.5   | 138.3   | 42.7    | 156.4  | 60.8    | Consensus includes gb:AI810484 /FEA=EST /DB_XREF=gi:5397050 /DB_XREF=est:wb89b11.x1 /           |
| 425.5   | 1462.7  | 866.4   | 1130.9  | 360     | 1053.4  | 416.3   | 1708.1  | 875     | 855.5   | 321     | 170.9  | 471.3   | gb:NM_001247.1 /DEF=Homo sapiens ectonucleoside triphosphate diphosphohydrolase 6 (putative     |
| 432.9   | 1005.8  | 1010.5  | 1806.4  | 926.8   | 1046.8  | 391     | 1587.5  | 643.2   | 1492.9  | 1582.1  | 209.7  | 1029.3  | Consensus includes gb:AB020630.1 /DEF=Homo sapiens mRNA for KIAA0823 protein, partial cds.      |
| 515.3   | 819.7   | 2167.7  | 1666.8  | 1832.4  | 1595.5  | 1989.4  | 1583.8  | 1170.2  | 557.7   | 938.7   | 174.4  | 647.8   | gb:NM_015937.1 /DEF=Homo sapiens CGI-06 protein (LOC51604), mRNA. /FEA=mRNA /GEN=LC             |
| 1394.4  | 1295.8  | 707.5   | 1514.5  | 2037.8  | 1217.1  | 1578.6  | 1254.8  | 1858.8  | 201.5   | 783.8   | 1667.3 | 941.7   | Consensus includes gb:AL022394 /DEF=Human DNA sequence from clone RP3-511B24 on chrom           |
| 1337.9  | 1081.2  | 813.4   | 1874.7  | 1512.5  | 1996.8  | 1455.1  | 1254.5  | 2058.9  | 1368.6  | 1790.2  | 1541.4 | 1143.8  | Consensus includes gb:AB032951.1 /DEF=Homo sapiens mRNA for KIAA1125 protein, partial cds.      |
| 952.5   | 962.5   | 1143.3  | 925.7   | 1179.9  | 788     | 183     | 861.9   | 903.7   | 420.9   | 125.2   | 176.8  | 105.1   | gb:NM_020062.1 /DEF=Homo sapiens GLUT4 enhancer factor (GEF), mRNA. /FEA=mRNA /GEN=             |
| 1275.3  | 2736.5  | 744.9   | 1796.9  | 2475    | 3132.4  | 2125.1  | 2576.7  | 1778.2  | 384.4   | 728     | 337.4  | 1102.2  | gb:AB019219.1 /DEF=Homo sapiens mRNA, complete cds, similar to yeast pre-mRNA splicing fact     |
| 401.7   | 53.3    | 121.5   | 545.6   | 310     | 755.6   | 725.6   | 623.4   | 186.8   | 771.9   | 609.4   | 196.6  | 60.6    | gb:NM_017859.1 /DEF=Homo sapiens hypothetical protein FLJ20517 (FLJ20517), mRNA. /FEA=m         |
| 492.4   | 697.6   | 138     | 1521.5  | 231.7   | 1065.6  | 519.5   | 1756.3  | 1268.9  | 1027.5  | 1646.8  | 144.4  | 152.5   | gb:BC001738.1 /DEF=Homo sapiens, Similar to ubiquitin-conjugating enzyme E2G 2 (homologous 1    |
| 1295.6  | 1244.5  | 1721.8  | 2531.8  | 1572.8  | 1782.1  | 2754.6  | 5145.6  | 4720.4  | 3478.9  | 3446.6  | 98.3   | 3277.5  | gb:NM_025143.1 /DEF=Homo sapiens hypothetical protein FLJ20856 (FLJ20856), mRNA. /FEA=m         |
| 2226.8  | 2231.2  | 3451    | 3360    | 2463.4  | 2710    | 3782.9  | 3308.2  | 2802.4  | 2563.6  | 3980.9  | 155.7  | 1981.6  | gb:NM_004649.1 /DEF=Homo sapiens ES1 (zebrafish) protein, human homolog of (C21ORF33), m        |
| 1031.8  | 1297.1  | 1088.8  | 1179.4  | 1678.3  | 1019.5  | 2085.3  | 2127.9  | 1472.6  | 2080.5  | 1750.1  | 155.1  | 1987    | gb:NM_006031.1 /DEF=Homo sapiens pericentrin (PCNT), mRNA. /FEA=mRNA /GEN=PCNT /PRC             |
| 2334.9  | 2532.6  | 4158.2  | 4081.5  | 4426.2  | 4375.5  | 3340    | 4588.9  | 2195.4  | 2288.1  | 1538.3  | 1249.8 | 1186.3  | Consensus includes gb:AK024034.1 /DEF=Homo sapiens cDNA FLJ13972 fis, clone Y79AA100154         |
| 3700.5  | 1583.3  | 2937    | 2312    | 3509    | 2832.3  | 3445    | 2262.6  | 3441.9  | 780.8   | 880     | 1084   | 92.3    | gb:NM_012295.1 /DEF=Homo sapiens calcineurin binding protein 1 (KIAA0330), mRNA. /FEA=mRI       |
| 1203.6  | 1185.3  | 1256.2  | 2035.6  | 1644    | 1761.6  | 1898.8  | 2951    | 2004.3  | 211.1   | 857.8   | 60.1   | 331.2   | gb:NM_005675.1 /DEF=Homo sapiens DiGeorge syndrome critical region gene 6 (DGCR6), mRNA.        |
| 1107.7  | 474.3   | 1111.7  | 1865.5  | 896.1   | 502.2   | 1008.8  | 1206.7  | 1358.8  | 2553.1  | 4093.3  | 1424   | 844     | Consensus includes gb:AW613387 /FEA=EST /DB_XREF=gi:7318573 /DB_XREF=est:hh71e04.x1 /           |
| 1361.6  | 1129.3  | 1180.9  | 863.4   | 970     | 1017.9  | 1417.5  | 1691.4  | 1118.4  | 2373.8  | 2256.1  | 1369.2 | 2116.8  | Consensus includes gb:AI459462 /FEA=EST /DB_XREF=gi:4312343 /DB_XREF=est:ar86e07.x1 /C          |
| 2116.7  | 1997.9  | 1721.5  | 2952.7  | 1975.4  | 2492.4  | 2692.1  | 3510.4  | 2037.2  | 1587.6  | 2707.3  | 2014.1 | 2446.8  | gb:NM_005198.2 /DEF=Homo sapiens choline kinase-like (CHKL), mRNA. /FEA=mRNA /GEN=CHI           |
| 478.1   | 394.7   | 1716    | 1499.2  | 488.2   | 853.1   | 814.5   | 174     | 365.4   | 106.8   | 118.1   | 160.4  | 117.8   | Consensus includes gb:AI081535 /FEA=EST /DB_XREF=gi:3418327 /DB_XREF=est:on04g03.x1 /           |
| 448.6   | 671.6   | 537.3   | 726.8   | 1050.1  | 608.7   | 251.9   | 213.2   | 628.7   | 121.8   | 210     | 336    | 267     | gb:NM_005740.1 /DEF=Homo sapiens dynein, axonemal, light polypeptide 4 (DNAL4), mRNA. /FE/      |
| 5651.1  | 4233.3  | 4297.8  | 3989.9  | 6503.8  | 4565.7  | 8235.8  | 11089.1 | 9944    | 7485.4  | 7022.4  | 3372   | 3406.1  | gb:NM_000878.1 /DEF=Homo sapiens interleukin 2 receptor, beta (IL2RB), mRNA. /FEA=mRNA /C       |
| 152.5   | 320.6   | 884.9   | 927.8   | 711.9   | 1107.9  | 390.6   | 800     | 565.5   | 121.3   | 129.9   | 494.4  | 130.6   | gb:NM_006739.1 /DEF=Homo sapiens minichromosome maintenance deficient (S. cerevisiae) 5 (cc     |
| 226.6   | 778.8   | 932.9   | 1656.8  | 483.1   | 557.8   | 250.3   | 968.6   | 673.9   | 90.4    | 243.3   | 819.3  | 91.4    | Cluster Incl. U93181:Homo sapiens nuclear dual-specificity phosphatase (SBF1) mRNA, partial cds |
| 2020.9  | 1126.1  | 2307.9  | 1440.5  | 2755.1  | 2446.1  | 4287.3  | 3363.3  | 3369.5  | 1058.5  | 1790.4  | 500    | 850.9   | Consensus includes gb:BG249599 /FEA=EST /DB_XREF=gi:12759426 /DB_XREF=est:602319692             |
| 10803.4 | 28187.1 | 35641.3 | 41825.8 | 23483   | 33323.9 | 15614.6 | 23981.6 | 38363.4 | 38891.1 | 15330.3 | 852.6  | 4408.3  | gb:M63438.1 /DEF=Human Ig rearranged gamma chain mRNA, V-J-C region and complete cds. /F        |
| 1165.5  | 813.9   | 1076.9  | 1087.5  | 744.6   | 1010.4  | 947.8   | 1295.9  | 1285.2  | 34.6    | 780.5   | 333.4  | 698.5   | gb:NM_002908.1 /DEF=Homo sapiens v-rel avian reticuloendotheliosis viral oncogene homolog (RE   |
| 852.8   | 943.9   | 1026.7  | 572.2   | 553.1   | 983.7   | 1095.8  | 716.1   | 797.4   | 637.8   | 196.4   | 167.7  | 60.7    | gb:NM_004082.2 /DEF=Homo sapiens dynactin 1 (p150, Glued (Drosophila) homolog) (DCTN1), tra     |
| 2203    | 3447.4  | 4065.6  | 3964.8  | 2183    | 3490.3  | 3183.6  | 3003.1  | 4493.6  | 2682    | 2295.3  | 2695.2 | 8115.8  | Consensus includes gb:BE968833 /FEA=EST /DB_XREF=gi:10579538 /DB_XREF=est:601649861             |
| 981     | 691.4   | 1320.1  | 1858.7  | 1529.4  | 1099.7  | 435.6   | 980.8   | 1400.9  | 279.2   | 1255.8  | 1036.8 | 2204.8  | Consensus includes gb:AL566299 /FEA=EST /DB_XREF=gi:12918529 /DB_XREF=est:AL566299 /            |
| 4343.5  | 3799.2  | 9570.1  | 4884.5  | 8722.8  | 10658.6 | 8806.7  | 6790.6  | 6849.7  | 16855.8 | 13684.3 | 3479.7 | 16413.6 | gb:U59302.1 /DEF=Human steroid receptor coactivator-1 F-SRC-1 mRNA, complete cds. /FEA=mR       |
| 232.9   | 941.3   | 645.6   | 751.8   | 447.1   | 1130.3  | 1108    | 2218    | 1935.9  | 3166.6  | 2663.6  | 253.2  | 3292    | Consensus includes gb:AV705559 /FEA=EST /DB_XREF=gi:10722858 /DB_XREF=est:AV705559 /            |
| 1630.8  | 1917.1  | 1081.9  | 2677.3  | 1354.4  | 1748.1  | 1863.3  | 2837.7  | 2273.2  | 2185    | 1396.6  | 1455.5 | 389     | Consensus includes gb:AI817942 /FEA=EST /DB_XREF=gi:5437110 /DB_XREF=est:wk41f07.x1 /C          |
| 1011.6  | 1046.2  | 1270    | 1198.5  | 1320.5  | 1028.5  | 1490.6  | 1098.9  | 1659.2  | 84.1    | 1284.1  | 146.4  | 1158.7  | Consensus includes gb:AA176798 /FEA=EST /DB_XREF=gi:1757939 /DB_XREF=est:zp32e12.s1 /           |
| 117.9   | 87.5    | 289.7   | 749     | 326.4   | 77.7    | 643     | 60.8    | 150.8   | 53.8    | 116.8   | 120.9  | 49.7    | gb:NM_012100.1 /DEF=Homo sapiens aspartyl aminopeptidase (DNPEP), mRNA. /FEA=mRNA /GI           |
| 777.9   | 1014.9  | 1761.1  | 1975.2  | 1465.4  | 2284    | 1829.8  | 1297    | 1261.2  | 693     | 933.1   | 184    | 424.5   | Consensus includes gb:AA532726 /FEA=EST /DB_XREF=gi:2278302 /DB_XREF=est:nj21e02.s1 /           |
| 1462.1  | 2903.9  | 1907.6  | 3765    | 1919.6  | 2729.2  | 5263.7  | 4787.2  | 4648.6  | 3242.9  | 3537.7  | 984.9  | 2014.1  | gb:BC001051.1 /DEF=Homo sapiens, ADP-ribosylation factor-like 7, clone MGC:1575, mRNA, com      |
| 1299.7  | 1025.8  | 1118.1  | 1611.6  | 580.9   | 759.2   | 1089.4  | 1661    | 1540    | 1957.5  | 807.5   | 586.6  | 835.2   | gb:NM_022730.1 /DEF=Homo sapiens hypothetical protein FLJ12612 similar to COP9 (constitutive    |
| 828.3   | 1326.8  | 932.4   | 1361.2  | 833.3   | 972.9   | 1373.2  | 1696.1  | 1489.3  | 366.1   | 1244.6  | 898.4  | 1072.6  | gb:AY024365.1 /DEF=Homo sapiens integrin-linked kinase-associated serinethreonine phosphatase   |
| 1431.1  | 2103.5  | 1629.5  | 2231.6  | 1535.1  | 2566.5  | 3613.6  | 3004.7  | 2940.4  | 2042    | 2653.3  | 147.1  | 892.7   | Consensus includes gb:BF941492 /FEA=EST /DB_XREF=gi:12358812 /DB_XREF=est:nac74d09.x            |
| 8379.4  | 4994.1  | 4458.5  | 4975.7  | 10820.7 | 9127.6  | 8076.6  | 4706.9  | 4720    | 3420.9  | 1695.7  | 1203.6 | 513.7   | gb:NM_002070.1 /DEF=Homo sapiens guanine nucleotide binding protein (G protein), alpha inhibiti |
| 2682.9  | 2788.3  | 2565.3  | 4129.3  | 3224.5  | 3975.9  | 2640.7  | 1957.8  | 1908.2  | 1077.3  | 1390    | 385.2  | 314.1   | gb:NM_003335.1 /DEF=Homo sapiens ubiquitin-activating enzyme E1-like (UBE1L), mRNA. /FEA=       |
| 1956.6  | 1707.8  | 1878    | 2286.7  | 1850.5  | 1654.4  | 2061.1  | 1788.5  | 1352.7  | 77.3    | 1731.7  | 907.7  | 1363.2  | gb:NM_007182.2 /DEF=Homo sapiens Ras association (RalGDSAF-6) domain family 1 (RASSF1),         |
| 864.4   | 882.2   | 1564.8  | 1466.1  | 902.7   | 730.2   | 172     | 1232.3  | 1353.2  | 42.6    | 89.4    | 595.1  | 95.8    | gb:NM_014966.1 /DEF=Homo sapiens KIAA0890 protein (KIAA0890), mRNA. /FEA=mRNA /GEN=             |
| 293     | 1883.4  | 1938.6  | 4221.3  | 1331.6  | 1485.1  | 450.6   | 2435.8  | 1163.1  | 279.6   | 131.7   | 168    | 210.8   | gb:NM_016381.1 /DEF=Homo sapiens hypothetical protein (DKFZp434J0310), mRNA. /FEA=mRN/          |
| 220.5   | 805.6   | 233.7   | 543.4   | 280.5   | 210.1   | 197     | 146.8   | 140     | 291.8   | 554     | 290.9  | 145.6   | gb:BC004300.1 /DEF=Homo sapiens, Similar to villin-like, clone MGC:10896, mRNA, complete cds.   |
| 128.7   | 392.8   | 373.1   | 3966.2  | 183.8   | 1952.1  | 577.6   | 2050.2  | 1452.6  | 2221.4  | 3648.5  | 92.7   | 1579.9  | gb:NM_006545.1 /DEF=Homo sapiens homologous to yeast nitrogen permease (candidate tumor si      |

|         |         |         |         |         |         |         |         |         |         |         |         |         |                                                                                                 |
|---------|---------|---------|---------|---------|---------|---------|---------|---------|---------|---------|---------|---------|-------------------------------------------------------------------------------------------------|
| 1511.5  | 2567.9  | 4208.9  | 1429.7  | 4441.3  | 1896.6  | 4407.8  | 3391.5  | 1637.5  | 261.1   | 261     | 613.5   | 339.1   | Consensus includes gb:BE891920 /FEA=EST /DB_XREF=gi:10351728 /DB_XREF=est:601435490             |
| 2223.8  | 3244.9  | 4830.1  | 3087    | 5670.1  | 4112.5  | 3629.7  | 3858.2  | 3412.5  | 3740.1  | 3370.3  | 1394.7  | 3613.2  | Consensus includes gb:AI652645 /FEA=EST /DB_XREF=gi:4736624 /DB_XREF=est:wb30b07.x1 /           |
| 671.8   | 467.6   | 856.1   | 827.2   | 271.6   | 421.8   | 585.9   | 809.7   | 1171.6  | 89.3    | 638.7   | 1209.1  | 327.1   | Consensus includes gb:AI357539 /FEA=EST /DB_XREF=gi:4109160 /DB_XREF=est:qu20a12.x1 /           |
| 530.4   | 732     | 1102    | 914.1   | 790.9   | 648.5   | 837     | 1257.6  | 1377.3  | 158.5   | 1158.2  | 369     | 1024.8  | gb:NM_002913.1 /DEF=Homo sapiens replication factor C (activator 1) 1 (145kD) (RFC1), mRNA. .   |
| 956.1   | 1201.7  | 2012.7  | 1650.1  | 946.8   | 1852.6  | 940.9   | 2215.4  | 2200.2  | 1694    | 1360.2  | 635.3   | 564.1   | gb:BC001286.1 /DEF=Homo sapiens, Similar to dCMP deaminase, clone MGC:5160, mRNA, comp          |
| 59.9    | 668.4   | 753.5   | 593.3   | 900.9   | 654     | 845.4   | 2028.8  | 1576.6  | 2892.8  | 1744.3  | 314.1   | 1253.3  | Consensus includes gb:AK024175.1 /DEF=Homo sapiens cDNA FLJ14113 fis, clone MAMMA1001.          |
| 12702.2 | 9521    | 9963.8  | 11126.6 | 13571.5 | 9319.7  | 9730.7  | 10863.5 | 7792.4  | 6891.6  | 8237.2  | 1671.5  | 2504.7  | gb:NM_002198.1 /DEF=Homo sapiens interferon regulatory factor 1 (IRF1), mRNA. /FEA=mRNA /C      |
| 997.9   | 1064.2  | 841.6   | 1161.5  | 691.5   | 788.9   | 1010.3  | 1987    | 1729.1  | 1104.9  | 1048.8  | 158.3   | 209     | Consensus includes gb:AW027359 /FEA=EST /DB_XREF=gi:5886115 /DB_XREF=est:wt73f08.x1 /           |
| 905.7   | 592.1   | 735.5   | 682.2   | 358.4   | 531.9   | 1337    | 968     | 1322    | 163.4   | 575.7   | 132.9   | 196.3   | Consensus includes gb:BE881529 /FEA=EST /DB_XREF=gi:10330305 /DB_XREF=est:601490242             |
| 4428.7  | 5115    | 9317.9  | 7609    | 6300.3  | 6930.5  | 7431.4  | 7705.1  | 5065.5  | 2242.4  | 2349.3  | 1490.2  | 1690.6  | Cluster Incl. AB015718:Homo sapiens lok mRNA for protein kinase, complete cds /cds=(50,2956) /c |
| 868.5   | 881.1   | 925.1   | 1117.5  | 803.5   | 1087.9  | 1464.2  | 1185.6  | 872.3   | 2127.5  | 1200.4  | 54.6    | 898.3   | Consensus includes gb:AK025759.1 /DEF=Homo sapiens cDNA: FLJ22106 fis, clone HEP17675. /f       |
| 62809.1 | 62301.2 | 71183.1 | 65941.4 | 69190.4 | 60998.1 | 89326.4 | 91993.7 | 67373.5 | 46096.4 | 67535.5 | 10242.4 | 37743.9 | gb:NM_005516.1 /DEF=Homo sapiens major histocompatibility complex, class I, E (HLA-E), mRNA.    |
| 9352.8  | 13913.6 | 11979.2 | 12852.3 | 11953.3 | 12679.3 | 9743.6  | 12754   | 14910   | 3089.5  | 6472.5  | 370.9   | 1824.5  | gb:NM_004640.1 /DEF=Homo sapiens HLA-B associated transcript-1 (D6S81E), mRNA. /FEA=mRI         |
| 1705.5  | 1379.6  | 1547.2  | 2011.1  | 894.1   | 1531.1  | 2127.2  | 2023.4  | 1893.2  | 96.2    | 918.9   | 789     | 762.3   | gb:NM_001470.1 /DEF=Homo sapiens gamma-aminobutyric acid (GABA) B receptor, 1 (GABBR1),         |
| 433.4   | 797.1   | 373.4   | 442.4   | 282.1   | 394.4   | 273.1   | 186.4   | 130     | 235.5   | 795.9   | 408.3   | 187.4   | gb:NM_001954.2 /DEF=Homo sapiens discoidin domain receptor family, member 1 (DDR1), transcr     |
| 1460.1  | 12899.7 | 6958    | 10627   | 6672.5  | 7888.4  | 8117.4  | 9807.7  | 6441.3  | 104.9   | 816     | 476.4   | 72.7    | Consensus includes gb:BG397856 /FEA=EST /DB_XREF=gi:13291304 /DB_XREF=est:602438950             |
| 68      | 106.2   | 348.1   | 631.5   | 134.4   | 320.9   | 124     | 122.4   | 69.6    | 76.1    | 76.7    | 237.3   | 60.8    | gb:NM_006295.1 /DEF=Homo sapiens valyl-tRNA synthetase 2 (VARS2), mRNA. /FEA=mRNA /GE           |
| 19061.7 | 8420.7  | 13773.4 | 11027.7 | 15805.1 | 12665.2 | 11176   | 7838.9  | 7376.3  | 5030.8  | 8691.9  | 1762.4  | 3025.5  | gb:NM_022107.1 /DEF=Homo sapiens G18.2 protein (G18.2), mRNA. /FEA=mRNA /GEN=G18.2 /F           |
| 6284.3  | 7824.2  | 9893.3  | 9874.8  | 6646    | 8208.7  | 6934    | 10789.9 | 8388.2  | 1793.2  | 5521.9  | 225.4   | 1066.8  | Consensus includes gb:X76775 /DEF=H.sapiens HLA-DMA gene /FEA=mRNA_1 /DB_XREF=gi:51             |
| 838.4   | 1341.4  | 1823.4  | 1783.8  | 2228.1  | 1444.7  | 1243    | 1136.6  | 1005.5  | 1093.1  | 554.4   | 325.9   | 499.1   | Consensus includes gb:AL035588 /DEF=Human DNA sequence from clone 696P19 on chromosom           |
| 10733.4 | 13736.1 | 19197.2 | 20579.7 | 16039.2 | 17124.8 | 13110.6 | 14781.1 | 19735.8 | 5844.3  | 9518.4  | 4113.9  | 3338.3  | gb:NM_001760.1 /DEF=Homo sapiens cyclin D3 (CCND3), mRNA. /FEA=mRNA /GEN=CCND3 /Pf              |
| 144.2   | 1636.3  | 930.5   | 1686.7  | 1602    | 648     | 516.9   | 1300    | 2573.5  | 260.2   | 76.3    | 221.8   | 103.1   | gb:NM_002224.1 /DEF=Homo sapiens inositol 1,4,5-triphosphate receptor, type 3 (ITPR3), mRNA.    |
| 4260.9  | 4029    | 2606.9  | 2929.5  | 4931.9  | 4992.3  | 4015.4  | 3830.4  | 4182.3  | 304.4   | 2829    | 801.6   | 1310.3  | Consensus includes gb:AL523814 /FEA=EST /DB_XREF=gi:12787307 /DB_XREF=est:AL523814 /            |
| 441.6   | 1908.6  | 1362.2  | 3343.1  | 469.5   | 2769.5  | 1253.5  | 2153.5  | 1101.3  | 433.6   | 260.3   | 234.9   | 587.6   | Consensus includes gb:AA670344 /FEA=EST /DB_XREF=gi:2631843 /DB_XREF=est:ad16b08.s1 /           |
| 840.8   | 1115.3  | 2646.5  | 1425.4  | 2421    | 2344.2  | 2254.6  | 1999.1  | 2685.4  | 353.4   | 1723.6  | 2262.3  | 1620.9  | gb:NM_006092.1 /DEF=Homo sapiens caspase recruitment domain 4 (NOD1), mRNA. /FEA=mRN/           |
| 2209.4  | 2336    | 2555.5  | 2849.7  | 4037.4  | 4022.7  | 1241.7  | 2020.3  | 3306.1  | 1601    | 2570.2  | 534.7   | 1882.4  | Consensus includes gb:AC003999 /DEF=Human PAC clone RP5-1139P1 from 7p15-p21 /FEA=CD            |
| 1149.4  | 861.5   | 1100.7  | 967.1   | 1769    | 1210.1  | 1333.6  | 813.5   | 775     | 350.7   | 445.7   | 307.4   | 460     | Consensus includes gb:BF055496 /FEA=EST /DB_XREF=gi:10809392 /DB_XREF=est:7j80h12.x1            |
| 1436.2  | 778.8   | 1605.3  | 1587.1  | 1694.9  | 1738.8  | 1716    | 1549.4  | 1675.9  | 773.8   | 1310.9  | 704.4   | 457.8   | gb:BC000787.1 /DEF=Homo sapiens, TRIAD3 protein, clone MGC:998, mRNA, complete cds. /FEA        |
| 114.1   | 1978.7  | 925.2   | 2656.5  | 920.8   | 1997.2  | 480.5   | 3976.7  | 939.1   | 876.6   | 1781.1  | 143.7   | 1703.4  | gb:NM_018044.1 /DEF=Homo sapiens hypothetical protein FLJ10267 (FLJ10267), mRNA. /FEA=m         |
| 192.3   | 36.5    | 317.2   | 366.3   | 38.1    | 228.4   | 483.8   | 525.8   | 338.2   | 68.7    | 130.8   | 111.5   | 82.1    | gb:BC006259.1 /DEF=Homo sapiens, clone MGC:11333, mRNA, complete cds. /FEA=mRNA /PRO            |
| 258     | 430.8   | 527.6   | 747.1   | 656.7   | 316     | 1038.4  | 678.3   | 1177.3  | 483.3   | 699.3   | 1203.9  | 321.2   | gb:NM_018991.1 /DEF=Homo sapiens DKFZp434A0131 protein (DKFZP434A0131), mRNA. /FEA=             |
| 1053.3  | 960.9   | 471.2   | 978.8   | 1008.4  | 554     | 582     | 1006.1  | 829.1   | 60      | 767.2   | 1570    | 132.5   | Consensus includes gb:BE547674 /FEA=EST /DB_XREF=gi:9776319 /DB_XREF=est:601076255F             |
| 999.9   | 797.6   | 1532.5  | 2485.5  | 1249.2  | 1075.3  | 821.2   | 1980.6  | 1206.9  | 729     | 871.8   | 776.3   | 589.7   | gb:NM_013440.1 /DEF=Homo sapiens paired immunoglobulin-like receptor beta (PILR(BETA)), mR      |
| 689.6   | 310.3   | 198.1   | 937.2   | 454.3   | 440.4   | 590.3   | 1711.4  | 614.3   | 331     | 296.9   | 342.1   | 604.5   | Consensus includes gb:AB011115.1 /DEF=Homo sapiens mRNA for KIAA0543 protein, partial cds.      |
| 966.1   | 639.5   | 981.3   | 789.9   | 979.3   | 807.6   | 1246.6  | 1139.7  | 1156.9  | 1141.4  | 1353.9  | 68.6    | 973.7   | Consensus includes gb:AB029026.1 /DEF=Homo sapiens mRNA for KIAA1103 protein, partial cds.      |
| 1105.9  | 1150.2  | 1220    | 1307.4  | 743.2   | 1121.5  | 555.7   | 1176.6  | 872     | 215.9   | 976.2   | 267.3   | 808.2   | gb:AF080158.1 /DEF=Homo sapiens Ikb kinase-b (IKK-beta) mRNA, complete cds. /FEA=mRNA /C        |
| 146.8   | 91      | 350.7   | 307     | 197.6   | 128.1   | 264     | 225.7   | 445     | 404.2   | 27.5    | 112     | 36.5    | gb:NM_001715.1 /DEF=Homo sapiens B lymphoid tyrosine kinase (BLK), mRNA. /FEA=mRNA /GE          |
| 305.1   | 355.6   | 358.1   | 646.2   | 276.6   | 609.3   | 317.5   | 863.7   | 782.5   | 261.5   | 445.6   | 92.7    | 334.7   | Consensus includes gb:AK026820.1 /DEF=Homo sapiens cDNA: FLJ23167 fis, clone LNG09902. /f       |
| 305.1   | 208.3   | 362     | 393     | 158     | 237.8   | 548.1   | 331.2   | 529.8   | 930.4   | 636.9   | 207.8   | 540.3   | gb:NM_003033.1 /DEF=Homo sapiens sialyltransferase 4A (beta-galactosidase alpha-2,3-sialytrans  |
| 1270.5  | 1225.5  | 1058.2  | 1705.2  | 1697.7  | 1013.3  | 1357    | 1471.9  | 1284.1  | 590.5   | 977.4   | 332.9   | 281.9   | gb:NM_013291.1 /DEF=Homo sapiens cleavage and polyadenylation specific factor 1, 160kD subur    |
| 971.8   | 1084.4  | 1477.3  | 1392.5  | 1326.7  | 1093    | 1139.8  | 1515.6  | 1844.8  | 218     | 602     | 232.1   | 370.3   | gb:NM_004512.1 /DEF=Homo sapiens interleukin 11 receptor, alpha (IL11RA), mRNA. /FEA=mRN/       |
| 135.1   | 1156.1  | 136.7   | 1180.2  | 806.8   | 1263.1  | 1284.4  | 1085.5  | 895.9   | 263.9   | 35.9    | 222.3   | 60.7    | Consensus includes gb:AF283777.2 /DEF=Homo sapiens clone TCBAPO702 mRNA sequence. /FE           |
| 1131.9  | 1310.1  | 1485.2  | 1357.7  | 1335.5  | 1207.1  | 534     | 1563.5  | 865.3   | 547.3   | 359.3   | 172.9   | 141.1   | gb:AF029674.1 /DEF=Homo sapiens basic leucine zipper protein LZIP (LZIP) mRNA, complete cds.    |
| 4317    | 3910.2  | 3914.9  | 4364.6  | 2542.6  | 4634.5  | 7630.1  | 8226.6  | 4870.1  | 1601.9  | 2970.2  | 174.1   | 428.3   | gb:NM_003177.1 /DEF=Homo sapiens spleen tyrosine kinase (SYK), mRNA. /FEA=mRNA /GEN=S           |
| 1281.7  | 956.7   | 1664.6  | 2089.1  | 1262.3  | 1183.8  | 1601.7  | 2102.3  | 2032.9  | 3057.5  | 2878.4  | 1028.5  | 1437.3  | Consensus includes gb:BE962483 /FEA=EST /DB_XREF=gi:11765431 /DB_XREF=est:601655782             |
| 433.3   | 1169.1  | 293.8   | 898.7   | 438     | 1159.9  | 862.3   | 1026.2  | 1015.6  | 78.4    | 1489.8  | 742.5   | 496.7   | gb:NM_013366.2 /DEF=Homo sapiens anaphase-promoting complex subunit 2 (APC2), mRNA. /FE         |
| 101.6   | 568.2   | 1207.1  | 987.6   | 389.3   | 635.5   | 1161.7  | 1667.6  | 1016.3  | 246.8   | 294.8   | 138.4   | 118.3   | gb:NM_001261.1 /DEF=Homo sapiens cyclin-dependent kinase 9 (CDC2-related kinase) (CDK9), n      |
| 1032.8  | 1124.4  | 1135.5  | 1141.6  | 357.3   | 710.1   | 1089.9  | 1263.9  | 1445    | 921.9   | 412.1   | 1631.2  | 553.5   | gb:NM_005157.2 /DEF=Homo sapiens v-abl Abelson murine leukemia viral oncogene homolog 1 (A      |
| 988.2   | 1025.7  | 1511.3  | 2524.3  | 2123.6  | 2050.7  | 2989.2  | 2044.3  | 1892    | 2275.4  | 2553.1  | 490.5   | 2617.7  | gb:BC000350.1 /DEF=Homo sapiens, ubiquitin specific protease 11, clone MGC:8620, mRNA, com      |
| 3243.7  | 1241    | 2003.6  | 1755.6  | 2756.1  | 1903.2  | 2779.6  | 2848.9  | 1940.8  | 1642.2  | 1781.6  | 1775.1  | 2028.2  | gb:D38616.1 /DEF=Human mRNA for phosphorylase kinase alpha subunit, complete cds. /FEA=mF       |
| 459.4   | 839.1   | 1334.1  | 1285.9  | 1250.7  | 1361.3  | 999.8   | 1284.1  | 1677.8  | 317.6   | 679.8   | 616     | 814.6   | Consensus includes gb:BE379542 /FEA=EST /DB_XREF=gi:9324907 /DB_XREF=est:601238148F             |

F1 /CLONE=IMAGE:4297924 /UG=Hs.332158 Homo sapiens clone PP1744 unknown mRNA  
)=Unknown (protein for MGC:3090) /DB\_XREF=gi:12803318 /UG=Hs.271586 hypothetical protein DKFZp762M115 /FL=gb:BC002477.1  
; /gb=W72694 /gi=1382514 /ug=Hs.851 /len=628  
LONE=IMAGE:417293 /UG=Hs.65135 KIAA0913 protein  
LONE=IMAGE:2140948 /UG=Hs.2200 perforin 1 (pore forming protein) /FL=gb:M28393.1 gb:NM\_005041.1  
IA, complete cds. /FEA=mRNA /PROD=Similar to actin binding LIM protein 1 /DB\_XREF=gi:12803266 /UG=Hs.158203 actin binding LIM protein 1 /FL=gb:BC002448.1  
(ECHS1), nuclear gene encoding mitochondrial protein, mRNA. /FEA=mRNA /GEN=ECHS1 /PROD=mitochondrial short-chain enoyl-coenzyme A hydratase 1 precursor /DB\_XREF=gi:12707569 /UG=Hs.76394 enoyl Coenzyme A hydratase, sho  
.ONE=IMAGE:268682 /UG=Hs.81248 CUG triplet repeat, RNA-binding protein 1 /FL=gb:AF248648.1  
/CLONE=IMAGE:3574033 /UG=Hs.14512 DIPB protein /FL=gb:NM\_017583.1  
mRNA. /FEA=mRNA /GEN=CD81 /PROD=CD81 antigen (target of antiproliferative antibody 1) /DB\_XREF=gi:4757943 /UG=Hs.54457 CD81 antigen (target of antiproliferative antibody 1) /FL=gb:BC002978.1 gb:M33680.1 gb:NM\_004356.  
RNA /GEN=SIGIRR /PROD=single Ig IL-1R-related molecule /DB\_XREF=gi:11141876 /UG=Hs.11809 single Ig IL-1R-related molecule /FL=gb:NM\_021805.1 gb:BC003591.1  
RNA /GEN=FLJ22635 /PROD=hypothetical protein FLJ22635 /DB\_XREF=gi:13376651 /UG=Hs.288529 hypothetical protein FLJ22635 /FL=gb:NM\_025092.1  
GEN=POR1 /PROD=partner of RAC1 (arfaptin 2) /DB\_XREF=gi:6912601 /UG=Hs.75139 partner of RAC1 (arfaptin 2) /FL=gb:BC000392.1 gb:U52522.1 gb:NM\_012402.1  
=mRNA /GEN=EMK1 /PROD=ELKL motif kinase 1 isoform a /DB\_XREF=gi:9845486 /UG=Hs.157199 ELKL motif kinase /FL=gb:NM\_017490.1  
/CLONE=IMAGE:3173372 /UG=Hs.173043 metastasis-associated 1-like 1  
lete cds. /FEA=mRNA /PROD=nuclear RNA export factor 1 /DB\_XREF=gi:13436184 /UG=Hs.323502 nuclear RNA export factor 1 /FL=gb:BC004904.1 gb:U80073.1 gb:AF126246.1 gb:AF112880.1 gb:NM\_006362.1  
d=3 /gb=AI201594 /gi=3754200 /ug=Hs.239333 /len=591  
\ /GEN=RBM14 /PROD=RNA binding motif protein 14 /DB\_XREF=gi:5454063 /UG=Hs.11170 RNA binding motif protein 14 /FL=gb:AF080561.1 gb:NM\_006328.1  
RNA. /FEA=CDS /GEN=CTSW /PROD=cathepsin W (lymphopain) /DB\_XREF=gi:4503156 /UG=Hs.87450 cathepsin W (lymphopain) /FL=gb:AF013611.1 gb:NM\_001335.1  
VA. /FEA=mRNA /GEN=SIPA1 /PROD=signal-induced proliferation-associated gene 1 /DB\_XREF=gi:5803168 /UG=Hs.7019 signal-induced proliferation-associated gene 1 /FL=gb:AB005666.1 gb:AF029789.1 gb:NM\_006747.1  
v=ZNF162 /PROD=zinc finger protein 162 /DB\_XREF=gi:4759339 /UG=Hs.180677 zinc finger protein 162 /FL=gb:NM\_004630.1 gb:D26120.1  
l) (RASGRP2), mRNA. /FEA=mRNA /GEN=RASGRP2 /PROD=RAS guanyl releasing protein 2 (calcium and DAG-regulated) /DB\_XREF=gi:5031622 /UG=Hs.99491 RAS guanyl releasing protein 2 (calcium and DAG-regulated) /FL=gb:NM\_0058  
i, mRNA. /FEA=mRNA /GEN=DOC-1R /PROD=tumor suppressor deleted in oral cancer-related1 /DB\_XREF=gi:5031668 /UG=Hs.25664 tumor suppressor deleted in oral cancer-related 1 /FL=gb:BC002850.1 gb:AF089814.1 gb:NM\_005851.1  
\ . /FEA=mRNA /GEN=REQ /PROD=requiem /DB\_XREF=gi:10862706 /UG=Hs.13495 requiem, apoptosis response zinc finger gene /FL=gb:NM\_006268.2 gb:U94585.1 gb:AF001433.1  
JA /GEN=H2AFX /PROD=H2A histone family, member X /DB\_XREF=gi:4504252 /UG=Hs.147097 H2A histone family, member X /FL=gb:BC004915.1 gb:NM\_002105.1  
rRNA. /FEA=mRNA /GEN=BLR1 /PROD=Burkitt lymphoma receptor 1, GTP-binding protein /DB\_XREF=gi:4502414 /UG=Hs.113916 Burkitt lymphoma receptor 1, GTP-binding protein /FL=gb:NM\_001716.1  
CLONE=IMAGE:452217 /UG=Hs.199160 myeloidlymphoid or mixed-lineage leukemia (trithorax (Drosophila) homolog) /FL=gb:L04284.1 gb:NM\_005933.1  
-HSPC015 /PROD=HSPC015 protein /DB\_XREF=gi:7661733 /UG=Hs.279900 HSPC015 protein /FL=gb:AF077201.1 gb:NM\_014026.1  
=REA /PROD=B-cell associated protein /DB\_XREF=gi:6005853 /UG=Hs.7771 B-cell associated protein /FL=gb:AF150962.1 gb:NM\_007273.1 gb:AF126021.1 gb:AF178980.1  
RSF7), mRNA. /FEA=mRNA /GEN=TNFRSF7 /PROD=CD27 antigen /DB\_XREF=gi:4507586 /UG=Hs.180841 tumor necrosis factor receptor superfamily, member 7 /FL=gb:M63928.1 gb:NM\_001242.1  
(EDR1), mRNA. /FEA=mRNA /GEN=EDR1 /PROD=early development regulator 1 /DB\_XREF=gi:11038623 /UG=Hs.305985 early development regulator 1 (homolog of polyhomeotic 1) /FL=gb:NM\_004426.1  
mRNA. /FEA=mRNA /GEN=PTPN6 /PROD=protein tyrosine phosphatase, non-receptor type 6 /DB\_XREF=gi:4506296 /UG=Hs.63489 protein tyrosine phosphatase, non-receptor type 6 /FL=gb:M74903.1 gb:M77273.1 gb:NM\_002831.  
NA. /FEA=mRNA /GEN=CHD4 /PROD=chromodomain helicase DNA binding protein 4 /DB\_XREF=gi:4557452 /UG=Hs.74441 chromodomain helicase DNA binding protein 4 /FL=gb:NM\_001273.1  
\ /GEN=ENO2 /PROD=enolase 2, (gamma, neuronal) /DB\_XREF=gi:5803010 /UG=Hs.146580 enolase 2, (gamma, neuronal) /FL=gb:BC002745.1 gb:NM\_001975.1 gb:M22349.1  
CLONE=1359669 /UG=Hs.2062 vitamin D (1,25- dihydroxyvitamin D3) receptor /FL=gb:AF026260.1 gb:J03258.1 gb:NM\_000376.1  
rRNA /GEN=MGC5540 /PROD=hypothetical protein MGC5540 /DB\_XREF=gi:13129097 /UG=Hs.267400 hypothetical protein MGC5540 /FL=gb:BC001321.1 gb:NM\_024095.1  
one MGC:4422, mRNA, complete cds. /FEA=mRNA /PROD=Similar to membrane bound C2 domain containing protein /DB\_XREF=gi:13436457 /UG=Hs.8309 KIAA0747 protein /FL=gb:BC004998.1  
RNA /GEN=DKFZP586A011 /PROD=DKFZP586A011 protein /DB\_XREF=gi:7661659 /UG=Hs.75884 DKFZP586A011 protein /FL=gb:NM\_015416.1  
nRNA /GEN=U5-100K /PROD=prp28, U5 snRNP 100 kd protein /DB\_XREF=gi:4759277 /UG=Hs.168103 prp28, U5 snRNP 100 kd protein /FL=gb:BC002366.1 gb:AF026402.1 gb:NM\_004818.1  
MONDOA /PROD=MondoA protein /DB\_XREF=gi:7662347 /UG=Hs.52081 KIAA0867 protein /FL=gb:AB020674.1 gb:NM\_014938.1  
A /GEN=KIAA0219 /DB\_XREF=gi:1504019 /UG=Hs.75354 GCN1 (general control of amino-acid synthesis 1, yeast)-like 1  
F1 /CLONE=IMAGE:3949779 /UG=Hs.80423 prostatic binding protein  
v /GEN=LOC51228 /PROD=glycolipid transfer protein /DB\_XREF=gi:7705986 /UG=Hs.135723 glycolipid transfer protein /FL=gb:AF209704.1 gb:NM\_016433.1  
/CLONE=IMAGE:2605098 /UG=Hs.170133 forkhead box O1A (rhabdomyosarcoma) /FL=gb:AF032885.1 gb:U02310.1 gb:NM\_002015.2  
CLONE=IMAGE:1927413 /UG=Hs.7911 KIAA0323 protein  
/CLONE=NT2RP3000977 /UG=Hs.3530 TLS-associated serine-arginine protein 2  
011), mRNA. /FEA=mRNA /GEN=KIAA1011 /PROD=KIAA1011 protein /DB\_XREF=gi:11056019 /UG=Hs.57749 synaptic nuclei expressed gene 2; KIAA1011 protein /FL=gb:NM\_015180.1 gb:AL080133.  
ipoyl succinyltransferase human, fetal brain, mRNA, 2987 nt. /FEA=mRNA /GEN=E2k /PROD=alpha-ketoglutarate dehydrogenase complex dihydrolipoyl succinyltransferase /DB\_XREF=gi:632883 /UG=Hs.296348 E2k  
o-e-04-0-UI.s1 /CLONE=IMAGE:2712654 /UG=Hs.168941 ESTs  
EA=mRNA /DB\_XREF=gi:33450 /UG=Hs.302063 immunoglobulin heavy constant mu

RNA /GEN=FLJ11700 /PROD=hypothetical protein FLJ11700 /DB\_XREF=gi:13376344 /UG=Hs.233395 hypothetical protein FLJ11700 /FL=gb:NM\_024892.1  
RNB6 /DB\_XREF=gi:7706686 /UG=Hs.241471 RNB6 /FL=gb:AF052504.1 gb:NM\_016337.1  
\\, complete cds. /FEA=mRNA /PROD=Similar to metastasis associated 1 /DB\_XREF=gi:13544097 /FL=gb:BC006177.1  
\\ . /FEA=mRNA /GEN=MAP2K5 /PROD=mitogen-activated protein kinase kinase 5 /DB\_XREF=gi:4506100 /UG=Hs.250870 mitogen-activated protein kinase kinase 5 /FL=gb:U25265.1 gb:NM\_002757.1  
JA /GEN=MDS018 /PROD=hypothetical protein MDS018 /DB\_XREF=gi:11141896 /UG=Hs.24647 hypothetical protein MDS018 /FL=gb:AF182419.1 gb:NM\_021823.1  
d=3 /gb=AA907940 /gi=3041944 /ug=Hs.234006 /len=404  
FEA=mRNA /GEN=PRKCB1 /PROD=protein kinase C beta-II type /DB\_XREF=gi:189968 /UG=Hs.77202 protein kinase C, beta 1 /FL=gb:M13975.1  
SF14), mRNA. /FEA=mRNA /GEN=TNFSF14 /PROD=tumor necrosis factor (ligand) superfamily, member 14 /DB\_XREF=gi:4507600 /UG=Hs.129708 tumor necrosis factor (ligand) superfamily, member 14 /FL=gb:AF036581.1 gb:AF064090.1 gb:NM\_002757.1  
RNA /GEN=MGC3121 /PROD=hypothetical protein MGC3121 /DB\_XREF=gi:13128979 /UG=Hs.293629 hypothetical protein MGC3121 /FL=gb:BC000119.1 gb:NM\_024031.1  
CAP), mRNA. /FEA=CDS /GEN=SRCAP /PROD=Snf2-related CBP activator protein /DB\_XREF=gi:5730066 /UG=Hs.87908 Snf2-related CBP activator protein /FL=gb:AF143946.1 gb:NM\_006662.1  
RNA /GEN=FLJ13868 /PROD=hypothetical protein FLJ13868 /DB\_XREF=gi:12232402 /UG=Hs.9003 hypothetical protein FLJ13868 /FL=gb:NM\_022744.1  
FEA=mRNA /GEN=PHKG2 /PROD=phosphorylase kinase, gamma 2 (testis) /DB\_XREF=gi:4505784 /UG=Hs.196177 phosphorylase kinase, gamma 2 (testis) /FL=gb:BC002541.1 gb:M31606.1 gb:NM\_000294.1  
/FEA=mRNA /GEN=KIAA0544 /PROD=KIAA0544 protein /DB\_XREF=gi:3043611 /UG=Hs.284251 KIAA0544 protein  
RNA. /FEA=mRNA /GEN=PDPK1 /PROD=3-phosphoinositide dependent protein kinase-1 /DB\_XREF=gi:4505694 /UG=Hs.154729 3-phosphoinositide dependent protein kinase-1 /FL=gb:AF017995.1 gb:NM\_002613.1  
RNA /GEN=MGC2655 /PROD=hypothetical protein MGC2655 /DB\_XREF=gi:13236588 /UG=Hs.314807 hypothetical protein MGC2655 /FL=gb:BC003118.1 gb:NM\_024339.1  
LONE=IMAGE:2431333 /UG=Hs.101414 KIAA0557 protein  
RNA /GEN=FLJ22021 /PROD=hypothetical protein FLJ22021 /DB\_XREF=gi:13375689 /UG=Hs.7258 hypothetical protein FLJ22021 /FL=gb:NM\_024535.1  
=transcription factor NFATx4 /DB\_XREF=gi:1835590 /UG=Hs.172674 nuclear factor of activated T-cells, cytoplasmic, calcineurin-dependent 3 /FL=gb:U85430.1  
(TRADD) mRNA, 3 end of cds  
EA=mRNA /GEN=ADAT1 /PROD=adenosine deaminase, tRNA-specific 1 /DB\_XREF=gi:7382475 /UG=Hs.188661 adenosine deaminase, tRNA-specific 1 /FL=gb:BC002758.1 gb:AF125188.1 gb:NM\_012091.2  
LONE=IMAGE:2285334 /UG=Hs.40109 KIAA0872 protein /FL=gb:AB020679.1 gb:NM\_014940.1  
GEN=KIAA0233 /PROD=KIAA0233 gene product /DB\_XREF=gi:7662013 /UG=Hs.79077 KIAA0233 gene product /FL=gb:D87071.1 gb:NM\_014745.1  
somal recessive) (SPG7), mRNA. /FEA=mRNA /GEN=SPG7 /PROD=paraplegin /DB\_XREF=gi:4507172 /UG=Hs.296847 spastic paraplegia 7, paraplegin (pure and complicated autosomal recessive) /FL=gb:NM\_003119.1  
mRNA. /FEA=CDS /GEN=CMAR /PROD=cell matrix adhesion regulator /DB\_XREF=gi:4885142 /UG=Hs.272480 cell matrix adhesion regulator /FL=gb:NM\_005200.1  
nRNA /GEN=APRT /PROD=adenine phosphoribosyltransferase /DB\_XREF=gi:4502170 /UG=Hs.28914 adenine phosphoribosyltransferase /FL=gb:NM\_000485.1  
ymerase I, C, 110kD (TAF1C), mRNA. /FEA=mRNA /GEN=TAF1C /PROD=TATA box binding protein (TBP)-associated factor, RNA polymerase I, C, 110kD /DB\_XREF=gi:5032144 /UG=Hs.153022 TATA box binding protein (TBP)-associated factor  
FEA=mRNA /DB\_XREF=gi:3021395 /UG=Hs.5541 ATPase, Ca++ transporting, ubiquitous  
nolog (TIM22), mRNA. /FEA=mRNA /GEN=TIM22 /PROD=translocase of inner mitochondrial membrane 22 (yeast) homolog /DB\_XREF=gi:7019552 /UG=Hs.87595 translocase of inner mitochondrial membrane 22 (yeast) homolog /FL=gb:BC00  
RNA /GEN=SENP3 /PROD=sentrinSUMO-specific protease 3 /DB\_XREF=gi:7661681 /UG=Hs.118926 sentrinSUMO-specific protease 3 /FL=gb:AY008763.1 gb:AL050283.1 gb:NM\_015670.1  
HSPC165 /PROD=HSPC165 protein /DB\_XREF=gi:7661825 /UG=Hs.13605 HSPC165 protein /FL=gb:AF161514.1 gb:AF151070.1 gb:NM\_014185.1 gb:NM\_016492.1 gb:AF168714.1 gb:AF265206.1  
J=CTNS /PROD=cystinosis, nephropathic /DB\_XREF=gi:4826681 /UG=Hs.64837 cystinosis, nephropathic /FL=gb:NM\_004937.1  
e Prp8p (PRP8), mRNA. /FEA=mRNA /GEN=PRP8 /PROD=U5 snRNP-specific protein (220 kD), ortholog of S. cerevisiae Prp8p /DB\_XREF=gi:5453983 /UG=Hs.181368 U5 snRNP-specific protein (220 kD), ortholog of S. cerevisiae Prp8p /FL=gb:AF068220.1 gb:NM\_005173.1  
FEA=mRNA /GEN=ATP2A3 /PROD=ATPase, Ca++ transporting, ubiquitous /DB\_XREF=gi:4885076 /UG=Hs.5541 ATPase, Ca++ transporting, ubiquitous /FL=gb:AF068220.1 gb:NM\_005173.1  
RNA /GEN=FLJ22170 /PROD=hypothetical protein FLJ22170 /DB\_XREF=gi:13376664 /UG=Hs.288573 hypothetical protein FLJ22170 /FL=gb:NM\_025099.1  
/GEN=PLSCR3 /PROD=phospholipid scramblase 3 /DB\_XREF=gi:9966796 /UG=Hs.103382 phospholipid scramblase 3 /FL=gb:AF159442.1 gb:NM\_020360.1  
P53 /DB\_XREF=gi:189478 /UG=Hs.1846 tumor protein p53 (Li-Fraumeni syndrome) /FL=gb:K03199.1  
GEN=KIAA0100 /PROD=KIAA0100 gene product /DB\_XREF=gi:7661903 /UG=Hs.151761 KIAA0100 gene product /FL=gb:D43947.1 gb:NM\_014680.1  
CLONE=CL0BB007ZE10 (3 prime) /UG=Hs.153028 cytochrome b-561 /FL=gb:BC002976.1  
2 /DB\_XREF=gi:1136385 /UG=Hs.12303 suppressor of Ty (S.cerevisiae) 6 homolog /FL=gb:D79984.1  
CLONE=IMAGE:868473 /UG=Hs.321677 signal transducer and activator of transcription 3 (acute-phase response factor) /FL=gb:BC000627.1 gb:NM\_003150.1 gb:L29277.1  
37 /UG=Hs.323910 v-erb-b2 avian erythroblastic leukemia viral oncogene homolog 2 (neuroglioblastoma derived oncogene homolog)  
3)=Unknown (protein for MGC:2854) /DB\_XREF=gi:13177696 /UG=Hs.136075 Homo sapiens cDNA: FLJ23438 fis, clone HRC13275 /FL=gb:BC003629.1  
3D=T-box 21 /DB\_XREF=gi:7019548 /UG=Hs.272409 T-box 21 /FL=gb:AF093098.1 gb:NM\_013351.1 gb:AF241243.2  
complete cds. /FEA=mRNA /PROD=serologically defined breast cancer antigen NY-BR-96 /DB\_XREF=gi:12060854 /UG=Hs.4789 Homo sapiens serologically defined breast cancer antigen NY-BR-96 mRNA, complete cds /FL=gb:AF308302.1  
transcript variant 1, mRNA. /FEA=mRNA /GEN=CD79B /PROD=CD79B antigen, isoform 1 precursor /DB\_XREF=gi:11038673 /UG=Hs.89575 CD79B antigen (immunoglobulin-associated beta) /FL=gb:NM\_000626.1 gb:M80461.1 gb:M89957.1  
F1 /CLONE=IMAGE:4328791 /UG=Hs.29282 mitogen-activated protein kinase kinase kinase 3 /FL=gb:U78876.1 gb:NM\_002401.1  
J=LOC51181 /PROD=carbonyl reductase /DB\_XREF=gi:7705924 /UG=Hs.9857 carbonyl reductase /FL=gb:BC001470.1 gb:AF113123.1 gb:NM\_016286.1  
amily, protein G (MAFG), mRNA. /FEA=mRNA /GEN=MAFG /PROD=v-maf musculoaponeurotic fibrosarcoma (avian) oncogene family, protein G /DB\_XREF=gi:4505072 /UG=Hs.252229 v-maf musculoaponeurotic fibrosarcoma (avian) oncogene  
FEA=mRNA /PROD=cell division control protein septin D1 /DB\_XREF=gi:11055010 /UG=Hs.181002 MLL septin-like fusion /FL=gb:AF142408.1 gb:AF142569.1  
RNA /GEN=FLJ22686 /PROD=hypothetical protein FLJ22686 /DB\_XREF=gi:13376444 /UG=Hs.286035 hypothetical protein FLJ22686 /FL=gb:NM\_024957.1  
disease type II) (GAA), mRNA. /FEA=mRNA /GEN=GAA /PROD=acid alpha-glucosidase preproprotein /DB\_XREF=gi:11496988 /UG=Hs.1437 glucosidase, alpha; acid (Pompe disease, glycogen storage disease type II) /FL=gb:NM\_000152.2 gb:NM\_000152.2  
GBP /PROD=CpG binding protein /DB\_XREF=gi:7656974 /UG=Hs.180933 CpG binding protein /FL=gb:AL136862.1 gb:AF149758.1 gb:NM\_014593.1 gb:AB031069.1

/CLONE=IMAGE:3285545 /UG=Hs.78335 microtubule-associated protein, RPEB family, member 2  
'GEN=LOC51291 /PROD=Gem-interacting protein /DB\_XREF=gi:7706106 /UG=Hs.49427 Gem-interacting protein /FL=gb:AF132541.1 gb:NM\_016573.1  
F1 /CLONE=IMAGE:4473753 /UG=Hs.190452 KIAA0365 gene product  
coupled receptor, 4 (EDG4), mRNA. /FEA=mRNA /GEN=EDG4 /PROD=endothelial differentiation, lysophosphatidic acid G-protein-coupled receptor, 4 /DB\_XREF=gi:11038657 /UG=Hs.122575 endothelial differentiation, lysophosphatidic acid G-  
/FEA=mRNA /GEN=KIAA0521 /PROD=KIAA0521 protein /DB\_XREF=gi:3043565 /UG=Hs.6150 Rho-specific guanine nucleotide exchange factor p114  
F1 /CLONE=IMAGE:4510766 /UG=Hs.278378 karyopherin beta 2b, transportin /FL=gb:AF019039.1  
N=GPSN2 /PROD=glycoprotein, synaptic 2 /DB\_XREF=gi:4759061 /UG=Hs.306122 glycoprotein, synaptic 2 /FL=gb:AF038959.1 gb:NM\_004868.  
, mRNA. /FEA=mRNA /GEN=POLRMT /PROD=polymerase (RNA) mitochondrial (DNA directed) /DB\_XREF=gi:4826925 /UG=Hs.153880 polymerase (RNA) mitochondrial (DNA directed) /FL=gb:U75370.1 gb:NM\_005035.1  
/FEA=mRNA /GEN=KIAA0561 /PROD=KIAA0561 protein /DB\_XREF=gi:3043645 /UG=Hs.173864 KIAA0561 protein  
LONE=S90413.NIH-116-R.ab1 /UG=Hs.278675 bromodomain-containing 4 /FL=gb:NM\_014299.1  
A /GEN=CSNK1G2 /PROD=casein kinase 1, gamma 2 /DB\_XREF=gi:11079647 /UG=Hs.181390 casein kinase 1, gamma 2 /FL=gb:NM\_001319.2 gb:U89896.1  
nplete cds. /FEA=mRNA /PROD=hypothetical protein FLJ20244 /DB\_XREF=gi:12803346 /UG=Hs.158947 hypothetical protein FLJ20244 /FL=gb:BC002492.1  
d=3 /gb=AI660497 /gi=4764067 /ug=Hs.26570 /len=792  
nplete cds. /FEA=mRNA /PROD=hypothetical protein FLJ20011 /DB\_XREF=gi:13111838 /UG=Hs.256583 interleukin enhancer binding factor 3, 90kD /FL=gb:BC003086.1 gb:NM\_004516.1 gb:U10324.1 gb:AF167570.1 gb:NM\_012218.1  
CLONE=IMAGE:1625242 /UG=Hs.75309 eukaryotic translation elongation factor 2  
/CLONE=IMAGE:3321439 /UG=Hs.98289 VRK3 for vaccinia related kinase 3



RNA /GEN=FLJ20340 /PROD=hypothetical protein FLJ20340 /DB\_XREF=gi:8923315 /UG=Hs.272794 hypothetical protein FLJ20340 /FL=gb:NM\_017773.1  
: KIAA0489. /FEA=mRNA /DB\_XREF=gi:3413932 /UG=Hs.169431 KIAA0489 protein  
\ /FEA=mRNA /GEN=CDC25B /PROD=cell division cycle 25B, isoform 3 /DB\_XREF=gi:11641412 /UG=Hs.153752 cell division cycle 25B /FL=gb:NM\_021873.1  
-tubulin /DB\_XREF=gi:4929137 /UG=Hs.179661 tubulin, beta polypeptide /FL=gb:BC000222.1 gb:BC002347.1 gb:BC001938.1 gb:AF070561.1 gb:AF070593.1 gb:AF070600.1 gb:AF141349.1  
3. /FEA=mRNA /PROD=ring finger protein 24 /DB\_XREF=gi:12802985 /UG=Hs.30524 ring finger protein 24 /FL=gb:BC000213.1  
CLONE=IMAGE:2312829 /UG=Hs.153934 core-binding factor, runt domain, alpha subunit 2; translocated to, 2 /FL=gb:AF068266.1 gb:AF069747.1  
: function) (ENTPD6), mRNA. /FEA=mRNA /GEN=ENTPD6 /PROD=ectonucleoside triphosphate diphosphohydrolase 6 (putative function) /DB\_XREF=gi:4557422 /UG=Hs.12330 ectonucleoside triphosphate diphosphohydrolase 6 (putative funct  
/FEA=mRNA /GEN=KIAA0823 /PROD=KIAA0823 protein /DB\_XREF=gi:4240131 /UG=Hs.45719 KIAA0823 protein  
)C51604 /PROD=CGI-06 protein /DB\_XREF=gi:7706257 /UG=Hs.84038 CGI-06 protein /FL=gb:AF132940.1 gb:NM\_015937.1  
osome 20q11.2-12. Contains the 3 end of the TOP1 gene for topoisomerase (DNA) I, the PLCG1 gene for phospholipase C gamma 1, gene KIAA0395 for a possible homeobox protein, a 60S Ribosomal Protein L... /FEA=mRNA\_1 /DB\_XREF=gi  
/FEA=mRNA /GEN=KIAA1125 /PROD=KIAA1125 protein /DB\_XREF=gi:6329748 /UG=Hs.75871 protein kinase C binding protein 1 /FL=gb:BC001004.1  
GEF /PROD=GLUT4 enhancer factor /DB\_XREF=gi:13236503 /UG=Hs.170088 GLUT4 enhancer factor /FL=gb:AF249267.3 gb:NM\_020062.1  
ors, Prp1Zer1 and Prp6. /FEA=mRNA /DB\_XREF=gi:4164165 /UG=Hs.31334 putative mitochondrial outer membrane protein import receptor /FL=gb:BC001666.1 gb:AF026031.1 gb:AB019219.1 gb:NM\_012469.1 gb:AF221842.1  
RNA /GEN=FLJ20517 /PROD=hypothetical protein FLJ20517 /DB\_XREF=gi:8923486 /UG=Hs.39850 hypothetical protein FLJ20517 /FL=gb:NM\_017859.1  
to yeast UBC7), clone MGC:1589, mRNA, complete cds. /FEA=mRNA /PROD=Similar to ubiquitin-conjugating enzyme E2G 2 (homologous to yeast UBC7) /DB\_XREF=gi:12804628 /UG=Hs.192853 ubiquitin-conjugating enzyme E2G 2 (homolog  
RNA /GEN=FLJ20856 /PROD=hypothetical protein FLJ20856 /DB\_XREF=gi:13376728 /UG=Hs.288916 hypothetical protein FLJ20856 /FL=gb:NM\_025143.1  
RNA. /FEA=mRNA /GEN=C21ORF33 /PROD=ES1 (zebrafish) protein, human homolog of /DB\_XREF=gi:5031690 /UG=Hs.182423 ES1 (zebrafish) protein, human homolog of /FL=gb:BC002370.1 gb:BC003587.1 gb:D86061.1 gb:U53003.1 gb:  
)D=pericentrin /DB\_XREF=gi:5174478 /UG=Hs.15896 pericentrin /FL=gb:U52962.1 gb:NM\_006031.1  
18, highly similar to PHOSPHATIDYLINOSITOL 4-KINASE ALPHA (EC 2.7.1.67). /FEA=mRNA /DB\_XREF=gi:10436297 /UG=Hs.171625 phosphatidylinositol 4-kinase, catalytic, alpha polypeptide  
NA /GEN=KIAA0330 /PROD=calcineurin binding protein 1 /DB\_XREF=gi:6912457 /UG=Hs.7840 calcineurin binding protein 1 /FL=gb:AF072441.1 gb:NM\_012295.1  
. /FEA=mRNA /GEN=DGCR6 /PROD=DiGeorge syndrome critical region protein 6 /DB\_XREF=gi:5031662 /UG=Hs.153910 DiGeorge syndrome critical region gene 6 /FL=gb:AF228707.1 gb:NM\_005675.1  
/CLONE=IMAGE:2968254 /UG=Hs.278541 ESTs, Moderately similar to TYPH\_HUMAN THYMIDINE PHOSPHORYLASE PRECURSOR H.sapiens  
)CLONE=IMAGE:2152164 /UG=Hs.25272 E1A binding protein p300  
KL /PROD=choline kinase-like /DB\_XREF=gi:6978648 /UG=Hs.154886 choline kinase-like /FL=gb:AB029886.1 gb:NM\_005198.2  
)CLONE=IMAGE:1555732 /UG=Hs.150540 Homo sapiens, clone IMAGE:3954961, mRNA, partial cds  
A=mRNA /GEN=DNAL4 /PROD=dynein, axonemal, light polypeptide 4 /DB\_XREF=gi:5031666 /UG=Hs.182595 dynein, axonemal, light polypeptide 4 /FL=gb:BC002968.1 gb:NM\_005740.  
;EN=IL2RB /PROD=interleukin 2 receptor, beta /DB\_XREF=gi:4504664 /UG=Hs.75596 interleukin 2 receptor, beta /FL=gb:M26062.1 gb:NM\_000878.1  
;ll division cycle 46) (MCM5), mRNA. /FEA=mRNA /GEN=MCM5 /PROD=minichromosome maintenance deficient (S.cerevisiae) 5 (cell division cycle 46) /DB\_XREF=gi:6981191 /UG=Hs.77171 minichromosome maintenance deficient (S. cerevisi  
/cds=(0,5095) /gb=U93181 /gi=3015537 /ug=Hs.112049 /len=5228  
:F1 /CLONE=IMAGE:4414895 /UG=Hs.110771 Homo sapiens cDNA: FLJ21904 fis, clone HEP03585  
EA=mRNA /DB\_XREF=gi:184847 /UG=Hs.156110 immunoglobulin kappa constant /FL=gb:M63438.1  
EL), mRNA. /FEA=mRNA /GEN=REL /PROD=v-rel avian reticuloendotheliosis viral oncogene homolog /DB\_XREF=gi:4506472 /UG=Hs.44313 v-rel avian reticuloendotheliosis viral oncogene homolog /FL=gb:NM\_002908.1  
anscript variant 1, mRNA. /FEA=mRNA /GEN=DCTN1 /PROD=dynactin 1, isoform 1 /DB\_XREF=gi:13259509 /UG=Hs.74617 dynactin 1 (p150, Glued (Drosophila) homolog) /FL=gb:NM\_023019.1 gb:NM\_004082.2  
F1 /CLONE=IMAGE:3933782 /UG=Hs.324648 Homo sapiens cDNA FLJ13700 fis, clone PLACE2000216, highly similar to SPECTRIN BETA CHAIN, BRAIN  
CLONE=CS0DF015YB11 (3 prime) /UG=Hs.80426 brain and reproductive organ-expressed (TNFRSF1A modulator)  
:NA /PROD=steroid receptor coactivator-1 F-SRC-1 /DB\_XREF=gi:1480645 /UG=Hs.74002 nuclear receptor coactivator 1 /FL=gb:U40396.1 gb:U59302.1 gb:U90661.1 gb:NM\_003743.1  
/CLONE=ADBAPE04 /UG=Hs.81412 lipin 1  
)CLONE=IMAGE:2417989 /UG=Hs.234569 zeta-chain (TCR) associated protein kinase (70 kD)  
/CLONE=IMAGE:611182 /UG=Hs.11238 KIAA0622 protein; Drosophila multiple asters (Mast)-like homolog 1  
EN=DNPEP /PROD=aspartyl aminopeptidase /DB\_XREF=gi:6912247 /UG=Hs.258551 aspartyl aminopeptidase /FL=gb:BC000653.1 gb:AF005050.2 gb:NM\_012100.1  
CLONE=IMAGE:993146 /UG=Hs.272586 KIAA0943 protein  
plete cds. /FEA=mRNA /PROD=ADP-ribosylation factor-like 7 /DB\_XREF=gi:12654450 /UG=Hs.111554 ADP-ribosylation factor-like 7 /FL=gb:BC001051.1 gb:AB016811.1 gb:NM\_005737.2  
photomorphogenic), subunit 7b (Arabidopsis) (FLJ12612), mRNA. /FEA=mRNA /GEN=FLJ12612 /PROD=hypothetical protein FLJ12612 similar to COP9(constitutive photomorphogenic), subunit 7b (Arabidopsis) /DB\_XREF=gi:12232384 /UG=H  
e 2C mRNA, complete cds. /FEA=mRNA /PROD=integrin-linked kinase-associated serine/threonine phosphatase 2C /DB\_XREF=gi:13432041 /UG=Hs.92033 integrin-linked kinase-associated serine/threonine phosphatase 2C /FL=gb:AL136850.1  
:1 /CLONE=IMAGE:3439937 /UG=Hs.280978 hypothetical protein FLJ10496  
ng activity polypeptide 2 (GNAI2), mRNA. /FEA=mRNA /GEN=GNAI2 /PROD=guanine nucleotide binding protein (G protein), alpha inhibiting activity polypeptide 2 /DB\_XREF=gi:4504040 /UG=Hs.77269 guanine nucleotide binding protein (G pro  
mRNA /GEN=UBE1L /PROD=ubiquitin-activating enzyme E1-like /DB\_XREF=gi:4507766 /UG=Hs.16695 ubiquitin-activating enzyme E1-like /FL=gb:NM\_003335.1 gb:L13852.1  
mRNA. /FEA=mRNA /GEN=RASSF1 /PROD=Ras association (RalGDS/AF-6) domain family 1 /DB\_XREF=gi:9256633 /UG=Hs.26931 Ras association (RalGDS/AF-6) domain family 1 /FL=gb:AF061836.1 gb:AF132676.1 gb:AF040703.2 gb:NM\_  
KIAA0890 /PROD=KIAA0890 protein /DB\_XREF=gi:7662361 /UG=Hs.323462 KIAA0890 protein /FL=gb:AB020697.1 gb:NM\_014966.1  
A /GEN=DKFZp434J0310 /PROD=hypothetical protein /DB\_XREF=gi:7705352 /UG=Hs.278408 hypothetical protein /FL=gb:AF319568.1 gb:AL137745.1 gb:NM\_016381.1  
. /FEA=mRNA /PROD=Similar to villin-like /DB\_XREF=gi:13279166 /UG=Hs.103665 villin-like /FL=gb:BC004300.1  
uppressor) (NPR2L), mRNA. /FEA=mRNA /GEN=NPR2L /PROD=homologous to yeast nitrogen permease (candidate tumor suppressor) /DB\_XREF=gi:5729948 /UG=Hs.169780 homologous to yeast nitrogen permease (candidate tumor suppre

F1 /CLONE=IMAGE:3920590 /UG=Hs.323342 actin related protein 23 complex, subunit 4 (20 kD) /FL=gb:AF006087.1 gb:NM\_005718.1  
CLONE=IMAGE:2307157 /UG=Hs.4764 KIAA0763 gene product /FL=gb:AB018306.1 gb:NM\_014869.1  
CLONE=IMAGE:1965310 /UG=Hs.289038 Homo sapiens cDNA: FLJ20994 fis, clone CAE02453  
/FEA=mRNA /GEN=RFC1 /PROD=replication factor C (activator 1) 1 (145kD) /DB\_XREF=gi:4506484 /FL=gb:NM\_002913.1  
lete cds. /FEA=mRNA /PROD=Similar to dCMP deaminase /DB\_XREF=gi:12654884 /UG=Hs.76894 dCMP deaminase /FL=gb:BC001286.1  
715. /FEA=mRNA /DB\_XREF=gi:10436491 /UG=Hs.323409 Homo sapiens cDNA FLJ141113 fis, clone MAMMA1001715  
EN=IRF1 /PROD=interferon regulatory factor 1 /DB\_XREF=gi:4504720 /UG=Hs.80645 interferon regulatory factor 1 /FL=gb:NM\_002198.1  
CLONE=IMAGE:2513127 /UG=Hs.169294 transcription factor 7 (T-cell specific, HMG-box) /FL=gb:NM\_003202.1  
F1 /CLONE=IMAGE:3892546 /UG=Hs.6214 KIAA0731 protein  
gb=AB015718 /gi=4001687 /ug=Hs.16134 /len=4221  
FEA=mRNA /DB\_XREF=gi:10438374 /UG=Hs.323470 Homo sapiens cDNA: FLJ22106 fis, clone HEP17675  
. /FEA=mRNA /GEN=HLA-E /PROD=major histocompatibility complex, class I, E /DB\_XREF=gi:5031744 /UG=Hs.181392 major histocompatibility complex, class I, E /FL=gb:BC002578.1 gb:NM\_005516.1  
NA /GEN=D6S81E /PROD=HLA-B associated transcript-1 /DB\_XREF=gi:4758111 /UG=Hs.55296 HLA-B associated transcript-1 /FL=gb:BC004350.1 gb:NM\_004640.1  
transcript variant 1, mRNA. /FEA=mRNA /GEN=GABBR1 /PROD=gamma-aminobutyric acid (GABA) B receptor, 1, isoform a precursor /DB\_XREF=gi:10835014 /UG=Hs.167017 gamma-aminobutyric acid (GABA) B receptor, 1 /FL=gb:NM\_0014  
ipt variant 2, mRNA. /FEA=mRNA /GEN=DDR1 /PROD=discoidin receptor tyrosine kinase isoform b /DB\_XREF=gi:7669486 /UG=Hs.75562 discoidin domain receptor family, member 1 /FL=gb:NM\_001954.2  
F1 /CLONE=IMAGE:4564956 /UG=Hs.198253 major histocompatibility complex, class II, DQ alpha 1  
N=VAR2 /PROD=valyl-tRNA synthetase 2 /DB\_XREF=gi:5454157 /UG=Hs.159637 valyl-tRNA synthetase 2 /FL=gb:NM\_006295.1  
PROD=G18.2 protein /DB\_XREF=gi:11545816 /UG=Hs.288316 chromosome 6 open reading frame 9 /FL=gb:NM\_022107.1 gb:AF155657.1  
2468 /UG=Hs.77522 major histocompatibility complex, class II, DM alpha  
ie 6p12.3-21.2. Contains the gene for TFEB, an NPM1 (Nucleophosmin, Numatrin) pseudogene and the MDF1 gene for MyoD family inhibitor (myogenic repressor I-MF). Contains ESTs, STSs, GSSs and two putat... /FEA=mRNA\_2 /DB\_XREF=gb:BC004350.1  
PROD=cyclin D3 /DB\_XREF=gi:4502618 /UG=Hs.83173 cyclin D3 /FL=gb:M90814.1 gb:M92287.1 gb:NM\_001760.1  
/FEA=mRNA /GEN=ITPR3 /PROD=inositol 1,4,5-triphosphate receptor, type 3 /DB\_XREF=gi:4504794 /UG=Hs.77515 inositol 1,4,5-triphosphate receptor, type 3 /FL=gb:D26351.1 gb:NM\_002224.1 gb:U01062.1  
CLONE=CS0DC003YH03 (3 prime) /UG=Hs.142653 ret finger protein /FL=gb:AF230393.1 gb:J03407.1 gb:NM\_006510.1  
/CLONE=IMAGE:878391 /UG=Hs.155191 villin 2 (ezrin) /FL=gb:J05021.1 gb:AL162086.1 gb:NM\_003379.2  
A /GEN=NOD1 /PROD=caspase recruitment domain 4 /DB\_XREF=gi:5174616 /UG=Hs.19405 caspase recruitment domain 4 /FL=gb:AF113925.1 gb:NM\_006092.1  
S /DB\_XREF=gi:2772566 /UG=Hs.52644 SKAP55 homologue  
/CLONE=IMAGE:3392807 /UG=Hs.112184 DKFZP586J0619 protein  
mRNA /PROD=TRIAD3 protein /DB\_XREF=gi:12653980 /UG=Hs.86228 TRIAD3 protein /FL=gb:BC000787.1 gb:NM\_019011.1  
RNA /GEN=FLJ10267 /PROD=hypothetical protein FLJ10267 /DB\_XREF=gi:8922321 /UG=Hs.272820 hypothetical protein FLJ10267 /FL=gb:NM\_018044.1  
D=Unknown (protein for MGC:11333) /DB\_XREF=gi:13623312 /FL=gb:BC006259.1  
mRNA /GEN=DKFZP434A0131 /PROD=DKFZp434A0131 protein /DB\_XREF=gi:11128020 /UG=Hs.289115 DKFZp434A0131 protein /FL=gb:NM\_018991.1  
1 /CLONE=IMAGE:3462325 /UG=Hs.204169 ESTs  
NA. /FEA=mRNA /GEN=PILR(BETA) /PROD=paired immunoglobulin-like receptor beta /DB\_XREF=gi:7305386 /UG=Hs.9408 paired immunoglobulin-like receptor beta /FL=gb:AF161081.1 gb:NM\_013440.1  
/FEA=mRNA /GEN=KIAA0543 /PROD=KIAA0543 protein /DB\_XREF=gi:3043609 /UG=Hs.98507 KIAA0543 protein  
/FEA=mRNA /GEN=KIAA1103 /PROD=KIAA1103 protein /DB\_XREF=gi:5689542 /UG=Hs.173159 transforming, acidic coiled-coil containing protein 1  
EN=IKK-beta /PROD=IkB kinase-b /DB\_XREF=gi:4185274 /UG=Hs.226573 inhibitor of kappa light polypeptide gene enhancer in B-cells, kinase beta /FL=gb:AF031416.1 gb:AF080158.1  
N=BLK /PROD=B lymphoid tyrosine kinase /DB\_XREF=gi:4502412 /UG=Hs.2243 B lymphoid tyrosine kinase /FL=gb:NM\_001715.1  
FEA=mRNA /DB\_XREF=gi:10439765 /UG=Hs.287730 Homo sapiens cDNA: FLJ23167 fis, clone LNG09902  
ferase) (SIAT4A), mRNA. /FEA=mRNA /GEN=SIAT4A /PROD=sialyltransferase 4A (beta-galactosidase alpha-2,3-sialyltransferase) /DB\_XREF=gi:4506950 /UG=Hs.301698 sialyltransferase 4A (beta-galactosidase alpha-2,3-sialyltransferase) /FL=gb:BC001286.1  
it (CPSF1), mRNA. /FEA=mRNA /GEN=CPSF1 /PROD=cleavage and polyadenylation specific factor 1, 160kD subunit /DB\_XREF=gi:9558724 /UG=Hs.83727 cleavage and polyadenylation specific factor 1, 160kD subunit /FL=gb:U37012.1 gb:U37012.1  
A /GEN=IL11RA /PROD=interleukin 11 receptor, alpha /DB\_XREF=gi:4758593 /UG=Hs.64310 interleukin 11 receptor, alpha /FL=gb:BC003110.1 gb:NM\_004512.1 gb:U32324.1  
A=mRNA /DB\_XREF=gi:10281735 /UG=Hs.116481 CD72 antigen  
. /FEA=mRNA /GEN=LZIP /PROD=basic leucine zipper protein LZIP /DB\_XREF=gi:2599559 /UG=Hs.287921 cAMP responsive element binding protein 3 (human) /FL=gb:AF211848.1 gb:AF009368.1 gb:AF029674.1 gb:NM\_006368.1  
YK /PROD=spleen tyrosine kinase /DB\_XREF=gi:4507328 /UG=Hs.74101 spleen tyrosine kinase /FL=gb:NM\_003177.1  
R1 /CLONE=IMAGE:3846116 /UG=Hs.179703 KIAA0129 gene product /FL=gb:D50919.1 gb:NM\_014788.1  
A=mRNA /GEN=APC2 /PROD=anaphase-promoting complex 2 /DB\_XREF=gi:7549800 /UG=Hs.23076 anaphase-promoting complex subunit 2 /FL=gb:AF191337.1 gb:NM\_013366.2  
RNA. /FEA=mRNA /GEN=CDK9 /PROD=cyclin-dependent kinase 9 (CDC2-related kinase) /DB\_XREF=gi:4502746 /UG=Hs.150423 cyclin-dependent kinase 9 (CDC2-related kinase) /FL=gb:BC001968.1 gb:NM\_001261.1 gb:L25676.1  
BL1), transcript variant a, mRNA. /FEA=mRNA /GEN=ABL1 /PROD=v-abl Abelson murine leukemia viral oncogene homolog 1 isoform a /DB\_XREF=gi:6382056 /UG=Hs.146355 v-abl Abelson murine leukemia viral oncogene homolog 1 /FL=gb:BC000350.1  
plete cds. /FEA=mRNA /PROD=ubiquitin specific protease 11 /DB\_XREF=gi:12653164 /UG=Hs.171501 ubiquitin specific protease 11 /FL=gb:BC000350.1 gb:U44839.1 gb:NM\_004651.1  
NA /PROD=phosphorylase kinase alpha subunit /DB\_XREF=gi:1304117 /UG=Hs.54941 phosphorylase kinase, alpha 2 (liver) /FL=gb:D38616.1 gb:NM\_000292.1  
1 /CLONE=IMAGE:3610234 /UG=Hs.25601 chromodomain helicase DNA binding protein 3 /FL=gb:U91543.1



---

rt chain, 1, mitochondrial /FL=gb:NM\_004092.2 gb:D13900.

325.1 gb:AF043723.1

3:NM\_003807.1

ctor, RNA polymerase I, C, 110kD /FL=gb:NM\_005679.1 gb:L39059.1

2324.1 gb:AF155330.1 gb:NM\_013337.1

gb:AB007510.1 gb:AF092565.1 gb:NM\_006445.1

e family, protein G /FL=gb:AF059195.1 gb:NM\_002359.1

jb:M34424.1

protein-coupled receptor, 4 /FL=gb:NM\_004720.3 gb:AF197929.1 gb:AF011466.1 gb:AF233092.

000342.1 gb:M22636.1 gb:NM\_003089.1

07.1 gb:NM\_003422.1

\_003243.1 gb:L07594.1

family, member 12 (translocating chain-association membrane protein) /FL=gb:U72763.1 gb:U74611.1 gb:U78029.1 gb:U94501.1 gb:U94502.1 gb:NM\_003790.1

ion) /FL=gb:AF039916.1 gb:NM\_001247.1

i:11345540 /UG=Hs.268177 phospholipase C, gamma 1 (formerly subtype 148) /FL=gb:M34667.1 gb:NM\_002660.1

gous to yeast UBC7) /FL=gb:BC001738.1 gb:AF032456.1 gb:NM\_003343.1

NM\_004649.1

siae) 5 (cell division cycle 46) /FL=gb:D83986.1 gb:BC000142.1 gb:BC003656.1 gb:NM\_006739.1

ts.114432 hypothetical protein FLJ12612 similar to COP9 (constitutive photomorphogenic), subunit 7b (Arabidopsis) /FL=gb:NM\_022730.1  
gb:AY024365.1

tein), alpha inhibiting activity polypeptide 2 /FL=gb:J03004.1 gb:NM\_002070.

\_007182.2

ssor) /FL=gb:BC002791.1 gb:AF040707.1 gb:NM\_006545.1

.70.1 gb:AF301005.1 gb:AF099148.1

ji:5419648 /UG=Hs.23391 Human DNA sequence from clone 696P19 on chromosome 6p12.3-21.2. Contains the gene for TFEB, an NPM1 (Nucleophosmin, Numatrin) pseudogene and the MDFI gene for MyoD family inhibitor (myogenic repress

\_=gb:L13972.1 gb:NM\_003033.1 gb:L29555.1  
AB046744.1 gb:NM\_013291.

:M14752.1 gb:NM\_005157.2

---











ior I-MF). Contains ESTs, STSs, GSSs and two putative CpG

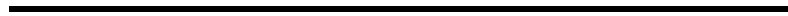

Supplement: 06_003_Batliwalla_Suppl_Table1.pdf [file 06_003_Batliwalla_Suppl_Table1.pdf]
