# Supplementary material
Source: PubMed Central journal article supplement (PMC1449519)
Supplement: 06_003_Batliwalla_Suppl_Table2.pdf [file 06_003_Batliwalla_Suppl_Table2.pdf]

| id | genes                                                                                                                                                                                                                                               | score | focus genes | top functions                                                                                                          |
|----|-----------------------------------------------------------------------------------------------------------------------------------------------------------------------------------------------------------------------------------------------------|-------|-------------|------------------------------------------------------------------------------------------------------------------------|
| 1  | APAF1, ARPC4, BRD4, CCND3, CDC25B, CHD3, CHD4, CREB3, CTSW, DDR1, EEF2, EP300, ERBB2, GPI, HLA-DMA, HLA-DQA1, IRF3, LETMD1, LPIN1, MLL, MTA1, NCOA1, NRG1, PDPK1, PHB2, PRKCZ, RFC1, RUNX3, TAF1C, TNFRSF7, TNFRSF25, TP53, TRIM44, TXN, VIL2       | 58    |             | Cellular Growth and Proliferation, Cell Death, Cell Cycle                                                              |
| 2  | ABL1, ATP1A1, BLK, CD36, CD72, CD81, CD3Z, CD79B, HLA-E, IGHM, IGKC, IKBKB, IL11RA, IL2RB, IRF1, LAX, LCK, LYN, MAP3K3, MAP4K1, PBP, PIK4CA, PLCG1, PLSCR1, PRKCB1, PTPN6, REL, SAMSN1, SNRP70, STAT3, SYK, TRADD, VDR, WNK1, ZAP70                 | 58    |             | Hematological System Development and Function, Immune and Lymphatic System Development and Function, Tissue Morphology |
| 3  | ALK, ATF3, ATF4, ATP2A3, BLR1, EVL, FAM38A, FRAP1, GABBR1, GZMB, HMGA1, IKBKB, IL9, IL13, IL4R, IRF4, IRS1, LTBP1, MSF, NFATC3, NKG7, NRG1, PRF1, PRKCA, PRKD2, PTPRF, S100A8, S100A9, SELP, SEPT7, SEPT11, TBX21, TNFRSF4, TNFRSF8, VIL2           | 15    |             | Cellular Development, Cell Death, Immunological Disease                                                                |
| 4  | ANAPC2, ANAPC11, ARL7, ASXL1, ASXL2, CAP1, CBX2, CBX4, CCNB1, CCR7, CD34, CTCF, DALRD3, FUSIP1, GDF15, IDI1, IGHM, IL2, ITPR3, KIAA1713, KITLG, PCGF1, PDCD4, PHF19, PTEN, RBM14, RHAG, RING1, SBF1, SIPA1, SPTBN1, TGFB1, TGFB3, UBE2C, ZNF42      | 15    |             | Cellular Growth and Proliferation, Immune Response, Immune and Lymphatic System Development and Function               |
| 5  | AR, AREG, ARF5, ARF6, ARFIP2, C20orf14, CAB39, CARD4, CD44, CDC37, CDK9, ELK1, GRN, HRAS, IQSEC1, KIF23, KPNB1, LYK5, MRAS, NUP62, NUP214, NXF1, NXT1, RAN, RANBP5, RANBP9, RASGRP2, RASSF1, RASSF5, RP2, SLC9A1, STK10, STK11, TNPO1, USP11        | 15    |             | Molecular Transport, Protein Trafficking, RNA Trafficking                                                              |
| 6  | ABHD5, ASAH1, BRE, C21orf33, CABIN1, CLASP1, DIABLO, ECGF1, FOSL1, GSPT1, HDAC1, HES1, KLF5, MEF2A, MEF2D, MHC2TA, MT2A, NRIP1, PDGFA, PEA15, PLIN, PML, PPARD, PRKCZ, RABEP2, RFP, RGS2, RGS16, SAP30, SF1, SLC2A4, SLC2A4RG, SP3, STAR, TNF       | 14    |             | Gene Expression, Cellular Development, Connective Tissue Development and Function                                      |
| 7  | ABLIM1, DVL1, ECHS1, EDG4, GCN1L1, GH1, GNAI2, GPSM3, GSK3B, ILK, ILKAP, LARP, MAP3K3, MAPKAPK2, MAPT, MARK2, NDE1, PARD3, PCNT2, PPFIBP1, PRDX1, RGS12, SH2B, TP53BP2, TRIM28, TSC1, TUBG1, UBE1L, YWHAB, YWHAE, YWHAG, YWHAH, YWHAQ, YWHAZ, ZFP36 | 14    |             | Protein Trafficking, Cellular Assembly and Organization, Gene Expression                                               |

|    |                                                                                                                                                                                                                                                            |    |                                                                                                                                   |
|----|------------------------------------------------------------------------------------------------------------------------------------------------------------------------------------------------------------------------------------------------------------|----|-----------------------------------------------------------------------------------------------------------------------------------|
| 8  | BIRC3, C13orf12, CASP5, CD84, CD244, CFTR, CX3CL1, CYB561, CYLN2, DDIT3, DDX23, ELAVL1, FCER2, FOXE1, IFNG, IL24, LOX, LY9, NFIC, NSEP1, PRPF8, RELA, REN, SH2D1A, SMNDC1, TAP1, TFEB, TNFRSF10B, TNFRSF6B, TNFSF12, TNFSF14, TNPO2, TPMT, TPO, TYRP1      | 12 | 13 Cancer, Cell Death, Gastrointestinal Disease                                                                                   |
| 9  | ADAM9, APP, CD72, CDK5, CLK2, CYP2E1, DCTN1, DOC-1R, ENO2, EPHA2, FOXO1A, FSHR, GRB2, HOXA5, ICAM3, IGF1, IGFBP1, IL6, ITGB3, KIF5A, KIF5B, KIF5C, KLC2, KNS2, LNK, MAPK1, MAPT, MOS, PHC1, PHKA2, PTPN1, RPS6KA3, SCAP2, SFRS3, SNRPA                     | 12 | Cellular Growth and Proliferation, Hepatic System<br>13 Development and Function, Cellular Compromise                             |
| 10 | ACP1, AFP, AHCYL1, BAT1, BTF3, CPT2, CSNK1A1, CSNK1G2, CTNNB1, CUGBP1, HMG2, HNRPU, HOXA9, ILF3, ING3, MAP4, MYC, NLK, PBX2, PBXIP1, PDGFRB, POLRMT, RANGAP1, RUVBL1, SDCBP, SENP3, SNRP70, SUMO1, SUMO2, TACC1, TCF7, TDG, TRRAP, TYMS, VHL               | 12 | 13 Cancer, Cell Morphology, Immunological Disease                                                                                 |
| 11 | ACSL1, APRT, ATR, CDKN1A, CDKN1B, CEBPA, COPS6, COPS8, COPS7A, COPS7B, CRADD, CTCF, CYP1B1, DF, E2F1, FGF7, G0S2, GAA, GPS2, H2AFX, HES1, HKR3, ICAM2, LIG1, MAP2K5, MCM3, MCM4, MCM5, PAX3, RPA2, SHOX, TCN2, TREX1, TRIM14, TYMS                         | 12 | DNA Replication, Recombination, and Repair,<br>13 Cancer, Cell Cycle                                                              |
| 12 | CARM1, CPSF1, CREBBP, CTSH, DHX9, DPF2, EGR2, ESRRA, EWSR1, FOS, FOSL2, KCNJ2, KPNA2, KPNA6, MAFG, NFE2, NMI, PELP1, POLR2A, POLR2C, PPARGC1A, RELB, RPS6KA3, SERPINE2, SFTPB, SMARCA4, SMARCE1, SPIB, SRCAP, SUPT5H, SUPT6H, TGFBR3, TGOLN2, TIMM22, TUBB | 11 | Gene Expression, Cancer, Skeletal and Muscular<br>12 Disorders                                                                    |
| 13 | SNIP1, TOPORS                                                                                                                                                                                                                                              | 1  | 1 Cell Signaling                                                                                                                  |
| 14 | PILR-L, PILRB                                                                                                                                                                                                                                              | 1  | 1                                                                                                                                 |
| 15 | ATXN7, CRX                                                                                                                                                                                                                                                 | 1  | Genetic Disorder, Ophthalmic Disease, Visual<br>1 System Development and Function                                                 |
| 16 | ME1, THRB                                                                                                                                                                                                                                                  | 1  | 1 Auditory Disease, Cancer, Cell Cycle                                                                                            |
| 17 | RIPK1, TRIAD3                                                                                                                                                                                                                                              | 1  | Cell Death, Embryonic Development, Dermatological<br>1 Diseases and Conditions                                                    |
| 18 | PRKCBP1, ZFYVE9                                                                                                                                                                                                                                            | 1  | Post-Translational Modification, Cell Morphology,<br>1 Cellular Assembly and Organization                                         |
| 19 | STX1A, SV2B, SYT1                                                                                                                                                                                                                                          | 1  | Cellular Assembly and Organization, Cellular<br>1 Function and Maintenance, Molecular Transport                                   |
| 20 | MLX, MONDOA, PLAG1                                                                                                                                                                                                                                         | 1  | Gene Expression, Molecular Transport, Cell-To-Cell<br>1 Signaling and Interaction                                                 |
| 21 | CBFA2T2, CBFA2T3, RUNX1T1                                                                                                                                                                                                                                  | 1  | Cellular Development, Hematological System<br>Development and Function, Immune and Lymphatic<br>1 System Development and Function |
| 22 | DNAH11, DNAL4, TCTE3                                                                                                                                                                                                                                       | 1  | Genetic Disorder, Respiratory Disease, Cellular<br>1 Function and Maintenance                                                     |
| 23 | APG4B, GABARAP, GABARAPL2                                                                                                                                                                                                                                  | 1  | 1 Protein Trafficking, Cancer, Gastrointestinal Disease                                                                           |

|    |                                   |   |                                                                                                 |
|----|-----------------------------------|---|-------------------------------------------------------------------------------------------------|
| 24 | DLD, DLST, OGDH                   | 1 | Energy Production, Metabolic Disease, Genetic Disorder                                          |
| 25 | IGHD, IGL@, IGLC1                 | 1 | 1                                                                                               |
| 26 | DCPS, EXOSC3, EXOSC4              | 1 | 1 RNA Post-Transcriptional Modification                                                         |
| 27 | MAP1A, RFX3, RFX4                 | 1 | Embryonic Development, Auditory and Vestibular System Development and Function, Gene Expression |
| 28 | GPAA1, PIGK, PIGS, PIGT           | 1 | 1                                                                                               |
| 29 | AMFR, DIO2, PARK2, UBE2G2, UBE2J2 | 1 | Protein Degradation, Protein Synthesis, Amino Acid Metabolism                                   |

## CellGrowth and proliferation, cell death, cell cycle

| Gene Symbol | Entrez Gene ID for Human | Entrez Gene ID for Mouse | Entrez Gene ID for Rat | Affymetrix  | Fold Change | p-value  |
|-------------|--------------------------|--------------------------|------------------------|-------------|-------------|----------|
| TNFRSF25    | 8718                     | 85030                    |                        | 219423_x_at | -1.94       | 1.85E-07 |
| PDPK1       | 5170                     | 18607                    | 81745                  | 204524_at   | -2.73       | 8.77E-09 |
| DDR1        | 780                      | 12305                    | 25678                  | 207169_x_at | -1.72       | 1.67E-04 |
| EP300       | 2033                     | 328572                   | 170915                 | 213579_s_at | -1.97       | 6.16E-08 |
| ARPC4       | 10093                    | 68089                    |                        | 217817_at   | -2.51       | 3.42E-06 |
| ERBB2       | 2064                     | 13866                    | 24337                  | 216836_s_at | -2.08       | 1.41E-04 |
| EEF2        | 1938                     | 13629                    | 29565                  | 200094_s_at | -1.53       | 2.22E-04 |
| NRG1        | 3084                     | 211323                   | 112400                 | 206343_s_at | 2.442449733 | 6.16E-04 |
| LPIN1       | 23175                    | 14245                    |                        | 212274_at   | -2.01       | 1.15E-04 |
| PRKCZ       | 5590                     | 18762                    | 25522                  | 202178_at   | -1.65       | 1.61E-05 |
| MLL         | 4297                     | 214162                   | 315606                 | 212078_s_at | -1.78       | 9.49E-07 |
| CDC25B      | 994                      | 12531                    | 171103                 | 201853_s_at | -1.56       | 3.46E-05 |
| RUNX3       | 864                      | 12399                    | 156726                 | 204198_s_at | -1.93       | 1.52E-06 |
| NCOA1       | 8648                     | 17977                    | 313929                 | 210249_s_at | -1.6        | 5.37E-05 |
| MTA1        | 9112                     | 116870                   | 64520                  | 211783_s_at | -1.65       | 8.82E-06 |
| TNFRSF7     | 939                      | 21940                    | 246340                 | 206150_at   | -1.67       | 1.47E-05 |
| CREB3       | 10488                    | 12913                    |                        | 209432_s_at | -1.65       | 7.22E-05 |
| GPI         | 2821                     | 14751                    | 292804                 | 208308_s_at | -1.6        | 1.66E-04 |
| VIL2        | 7430                     | 22350                    | 54319                  | 208622_s_at | -2.19       | 7.48E-05 |
| HLA-DMA     | 3108                     | 14998                    | 294274                 | 217478_s_at | -1.51       | 8.01E-04 |
| TXN         | 7295                     | 22166                    | 116484                 | 208864_s_at | 2.634438054 | 5.77E-04 |
| CHD4        | 1108                     | 107932                   | 117535                 | 201184_s_at | -1.59       | 2.96E-04 |
| TP53        | 7157                     | 22059                    | 24842                  | 211300_s_at | -2.07       | 6.09E-04 |
| TAF1C       | 9013                     | 21341                    |                        | 203938_s_at | -2.35       | 4.95E-04 |
| BRD4        | 23476                    | 57261                    |                        | 202102_s_at | -1.64       | 5.26E-05 |
| APAF1       | 317                      | 11783                    | 78963                  | 204859_s_at | 1.514070082 | 2.57E-04 |
| TRIM44      | 54765                    | 80985                    |                        | 217759_at   | -1.52       | 9.59E-04 |
| PHB2        | 11331                    | 12034                    | 114766                 | 201600_at   | -1.54       | 2.22E-06 |
| IRF3        | 3661                     | 54131                    | 292892                 | 202621_at   | -1.62       | 3.61E-04 |
| CTSW        | 1521                     | 13041                    |                        | 214450_at   | -1.63       | 4.64E-04 |
| LETMD1      | 25875                    | 68614                    | 363003                 | 207170_s_at | -1.58       | 1.48E-05 |
| CHD3        | 1107                     | 216848                   |                        | 208806_at   | -1.6        | 1.68E-05 |
| HLA-DQA1    | 3117                     | 14960                    | 309621                 | 212671_s_at | -2          | 4.49E-04 |
| RFC1        | 5981                     | 19687                    | 89809                  | 208021_s_at | -1.53       | 5.05E-04 |
| CCND3       | 896                      | 12445                    | 25193                  | 201700_at   | -1.56       | 2.99E-05 |

Hemat sytem dev and func, Immune system dev and func, tissue morphology

| Gene Symbol | Entrez Gene ID for Human | Entrez Gene ID for Mouse | Entrez Gene ID for Rat | Affymetrix  | Fold Change | p-value  |
|-------------|--------------------------|--------------------------|------------------------|-------------|-------------|----------|
| CD81        | 975                      | 12520                    | 25621                  | 200675_at   | -1.77       | 2.92E-05 |
| PBP         | 5037                     | 23980                    | 29542                  | 211941_s_at | -1.55       | 7.29E-05 |
| CD79B       | 974                      | 15985                    | 171055                 | 205297_s_at | -1.55       | 4.31E-04 |
| LCK         | 3932                     | 16818                    | 313050                 | 204891_s_at | -1.71       | 5.37E-06 |
| LYN         | 4067                     | 17096                    | 81515                  | 202626_s_at | 1.592825135 | 3.75E-04 |
| CD72        | 971                      | 12517                    |                        | 215925_s_at | -1.76       | 3.78E-04 |
| IL11RA      | 3590                     | 1615716158               | 245983                 | 204773_at   | -1.6        | 1.80E-04 |
| STAT3       | 6774                     | 20848                    | 25125                  | 208991_at   | -1.71       | 3.12E-05 |
| LAX         | 54900                    | 240754                   |                        | 207734_at   | -1.65       | 3.44E-06 |
| PTPN6       | 5777                     | 15170                    | 116689                 | 206687_s_at | -1.6        | 9.83E-05 |
| SAMSN1      | 64092                    | 67742                    | 170637                 | 220330_s_at | 2.080979792 | 6.67E-04 |
| ATP1A1      | 476                      | 11928                    | 24211                  | 220948_s_at | -1.71       | 8.96E-05 |
| TRADD       | 8717                     | 71609                    | 246756                 | 1729_at     | -1.77       | 3.49E-04 |
| CD36        | 948                      | 12491                    | 29184                  | 209555_s_at | 1.850873424 | 3.96E-05 |
| IL2RB       | 3560                     | 16185                    | 25746                  | 205291_at   | -1.78       | 3.16E-04 |
| PLSCR1      | 5359                     | 22038                    | 117540                 | 202430_s_at | 1.66901735  | 7.09E-04 |
| PLCG1       | 5335                     | 18803                    | 25738                  | 202789_at   | -1.73       | 5.58E-05 |
| REL         | 5966                     | 19696                    | 305584                 | 206036_s_at | -1.67       | 3.04E-05 |
| ZAP70       | 7535                     | 22637                    | 301348                 | 214032_at   | -1.81       | 4.26E-07 |
| PIK4CA      | 5297                     | 224020                   | 64161                  | 213408_s_at | -1.73       | 6.87E-07 |
| BLK         | 640                      | 12143                    |                        | 206255_at   | -3.63       | 1.23E-07 |
| PRKCB1      | 5579                     | 18751                    | 25023                  | 209685_s_at | -1.56       | 6.73E-07 |
| IGHM        | 3507                     | 16019                    |                        | 212827_at   | -2.11       | 3.27E-07 |

|        |       |            |        |             |             |          |
|--------|-------|------------|--------|-------------|-------------|----------|
| HLA-E  | 3133  | 1500615040 | 294228 | 200905_x_at | -1.56       | 3.40E-08 |
| IKBKB  | 3551  | 16150      | 84351  | 209342_s_at | -1.58       | 1.25E-04 |
| ABL1   | 25    | 11350      | 311860 | 202123_s_at | -1.51       | 2.62E-04 |
| VDR    | 7421  | 22337      | 24873  | 204255_s_at | -1.67       | 1.54E-05 |
| SNRP70 | 6625  | 20637      | 361574 | 201221_s_at | -1.53       | 9.22E-06 |
| MAP3K3 | 4215  | 26406      |        | 203514_at   | -3.66       | 2.57E-08 |
| IRF1   | 3659  | 16362      | 24508  | 202531_at   | -1.53       | 1.33E-05 |
| MAP4K1 | 11184 | 26411      |        | 214339_s_at | -1.83       | 3.13E-06 |
| SYK    | 6850  | 20963      | 25155  | 207540_s_at | -1.88       | 3.42E-05 |
| CD3Z   | 919   | 12503      | 25300  | 210031_at   | -1.96       | 6.47E-07 |
| IGKC   | 3514  | 16071      | 24491  | 221671_x_at | -1.94       | 7.65E-06 |
| WNK1   | 65125 | 232341     | 116477 | 216022_at   | 3.014486213 | 1.28E-05 |

| Gene Symbol | Entrez Gene ID for Human | Entrez Gene ID for Mouse | Entrez Gene ID for Rat | Affymetrix         | Fold Change | p-value  |
|-------------|--------------------------|--------------------------|------------------------|--------------------|-------------|----------|
| IRF4        | 3662                     | 16364                    |                        |                    |             |          |
| MSF         | 10801                    | 53860                    |                        | 83788 208657_s_at  | -1.73       | 7.44E-04 |
| S100A9      | 6280                     | 20202                    |                        | 94195              |             |          |
| SELP        | 6403                     | 20344                    |                        | 25651              |             |          |
| FRAP1       | 2475                     | 56717                    |                        | 56718              |             |          |
| FAM38A      | 9780                     |                          |                        | 202771_at          | -1.87       | 1.63E-04 |
|             | 7-Sep                    | 989                      | 235072                 | 64551              |             |          |
| NRG1        | 3084                     | 211323                   |                        | 112400 206343_s_at | 2.44244973  | 6.16E-04 |
| PRKCA       | 5578                     | 18750                    |                        | 24680              |             |          |
| BLR1        | 643                      | 12145                    |                        | 29363 206126_at    | -1.73       | 6.64E-04 |
| IL9         | 3578                     | 16198                    |                        | 116558             |             |          |
|             | 11-Sep                   | 55752                    | 52398                  |                    |             |          |
| TNFRSF4     | 7293                     | 22163                    |                        | 25572              |             |          |
| EVL         | 51466                    | 14026                    |                        | 79115 217838_s_at  | -1.61       | 1.52E-06 |
| NKG7        | 4818                     | 72310                    |                        | 171062 213915_at   | -1.76       | 7.29E-04 |
| PRF1        | 5551                     | 18646                    |                        | 50669 214617_at    | -1.81       | 1.11E-05 |
| IL4R        | 3566                     | 16190                    |                        | 25084              |             |          |
| S100A8      | 6279                     | 20201                    |                        | 116547 214370_at   | 2.62114707  | 5.69E-05 |
| TBX21       | 30009                    | 57765                    |                        | 220684_at          | -1.59       | 2.04E-05 |
| VIL2        | 7430                     | 22350                    |                        | 54319 208622_s_at  | -2.19       | 7.48E-05 |
| ATF3        | 467                      | 11910                    |                        | 25389              |             |          |
| LTBP1       | 4052                     | 268977                   |                        | 59107              |             |          |
| ATF4        | 468                      | 11911                    |                        | 79255              |             |          |
| IKBKB       | 3551                     | 16150                    |                        | 84351 209342_s_at  | -1.58       | 1.25E-04 |
| IL13        | 3596                     | 16163                    |                        | 116553             |             |          |
| NFATC3      | 4775                     | 18021                    |                        | 307803 210555_s_at | -1.7        | 4.91E-04 |
| GABBR1      | 2550                     | 54393                    |                        | 81657 203146_s_at  | -1.69       | 9.23E-05 |
| ALK         | 238                      | 11682                    |                        | 266802             |             |          |
| TNFRSF8     | 943                      | 21941                    |                        | 25069              |             |          |
| IRS1        | 3667                     | 16367                    |                        | 25467              |             |          |
| PTPRF       | 5792                     | 19268                    |                        | 360406             |             |          |
| ATP2A3      | 489                      | 53313                    |                        | 25391 213036_x_at  | -2.55       | 1.16E-05 |
| PRKD2       | 25865                    | 101540                   |                        | 209282_at          | -1.72       | 5.52E-05 |
| HMGA1       | 3159                     | 15361                    |                        | 117062             |             |          |
| GZMB        | 3002                     | 14939                    |                        | 171528             |             |          |

## Cellular growth, Immune response

| Gene Symbol | Entrez Gene ID for Human | Entrez Gene ID for Mouse | Entrez Gene ID for Rat | Affymetrix  | Fold Change | p-value  |
|-------------|--------------------------|--------------------------|------------------------|-------------|-------------|----------|
| CAP1        | 10487                    | 12331                    | 64185                  | 213798_s_at | -1.71       | 1.34E-08 |
| ANAPC11     | 51529                    | 66156                    |                        |             |             |          |
| SIPA1       | 6494                     | 20469                    | 361710                 | 204164_at   | -1.65       | 8.19E-04 |
| KITLG       | 4254                     | 17311                    | 2,930,360,427          |             |             |          |
| KIAA1713    | 80816                    | 211961                   |                        |             |             |          |
| ARL7        | 10123                    | 320982                   |                        | 202208_s_at | -2.08       | 9.37E-09 |
| FUSIP1      | 10772                    | 14105                    |                        | 213594_x_at | -1.6        | 3.34E-06 |
| ASXL2       | 55252                    | 75302                    |                        | 218659_at   | 1.784330195 | 2.08E-08 |
| CCNB1       | 891                      | 268697                   | 25203                  |             |             |          |
| IDI1        | 3422                     | 319554                   | 89784                  |             |             |          |
| CCR7        | 1236                     | 12775                    | 287673                 |             |             |          |
| ZNF42       | 7593                     | 109889                   |                        | 204139_x_at | -1.95       | 4.95E-04 |
| TGFB1       | 7040                     | 21803                    | 59086                  |             |             |          |
| PDCD4       | 27250                    | 18569                    | 64031                  |             |             |          |
| SBF1        | 6305                     | 77980                    |                        | 39835_at    | -1.79       | 9.52E-04 |
| PCGF1       | 84759                    | 69837                    | 312480                 |             |             |          |
| UBE2C       | 11065                    | 68612                    | 296368                 |             |             |          |
| DALRD3      | 55152                    | 67789                    |                        | 221934_s_at | -1.6        | 2.88E-05 |
| PTEN        | 5728                     | 19211                    | 50557                  |             |             |          |
| IL2         | 3558                     | 16183                    | 116562                 |             |             |          |
| IGHM        | 3507                     | 16019                    |                        | 212827_at   | -2.11       | 3.27E-07 |
| GDF15       | 9518                     | 23886                    | 29455                  |             |             |          |
| CBX4        | 8535                     | 12418                    |                        |             |             |          |
| PHF19       | 26147                    | 74016                    |                        |             |             |          |
| RHAG        | 6005                     | 19743                    | 65207                  | 206145_at   | 1.81157862  | 6.98E-04 |
| ITPR3       | 3710                     | 16440                    | 25679                  | 201189_s_at | -2.01       | 9.06E-05 |
| RBM14       | 10432                    | 56275                    | 170900                 | 204178_s_at | -2          | 8.61E-05 |
| TGFBR3      | 7049                     | 21814                    | 29610                  | 204731_at   | -1.97       | 4.72E-05 |
| CTCF        | 10664                    | 13018                    | 83726                  |             |             |          |
| RING1       | 6015                     | 19763                    | 309626                 |             |             |          |
| CBX2        | 84733                    | 12416                    |                        |             |             |          |
| ANAPC2      | 29882                    | 99152                    |                        | 218555_at   | -1.69       | 8.36E-04 |
| ASXL1       | 171023                   | 228790                   |                        |             |             |          |
| CD34        | 947                      | 12490                    | 305081                 |             |             |          |



SPTBN1

6711

20742

305614 212071\_s\_at

-1.57

1.02E-04

| Gene Symbol | Entrez Gene ID for Human | Entrez Gene ID for Mouse | Entrez Gene ID for Rat | Affymetrix  | Fold Change | p-value  |
|-------------|--------------------------|--------------------------|------------------------|-------------|-------------|----------|
| KIF23       | 9493                     | 71819                    | 315740                 |             |             |          |
| TNPO1       | 3842                     | 238799                   |                        | 221829_s_at | 1.590034071 | 4.35E-04 |
| NXF1        | 10482                    | 53319                    | 59087                  | 208922_s_at | -1.56       | 9.52E-06 |
| C20orf14    | 24148                    | 68879                    |                        | 208880_s_at | -1.63       | 1.77E-04 |
| NXT1        | 29107                    | 56488                    |                        |             |             |          |
| GRN         | 2896                     | 14824                    | 29143                  |             |             |          |
| IQSEC1      | 9922                     | 232227                   |                        | 203906_at   | -1.63       | 2.28E-04 |
| SLC9A1      | 6548                     | 20544                    | 24782                  |             |             |          |
| MRAS        | 22808                    | 17532                    | 25482                  |             |             |          |
| AR          | 367                      | 11835                    | 24208                  |             |             |          |
| CD44        | 960                      | 12505                    | 25406                  |             |             |          |
| RP2         | 6102                     | 19889                    |                        | 205191_at   | 1.752384081 | 4.35E-05 |
| NUP214      | 8021                     | 104,100,227,720          | 296634                 |             |             |          |
| RASSF1      | 11186                    | 56289                    | 363140                 | 204346_s_at | -1.77       | 7.99E-07 |
| RANBP9      | 10048                    | 56705                    |                        |             |             |          |
| RASGRP2     | 10235                    | 19395                    |                        | 208206_s_at | -1.8        | 1.61E-05 |
| ARFIP2      | 23647                    | 76932                    | 293344                 | 202109_at   | -1.5        | 1.62E-04 |
| CARD4       | 10392                    | 107607                   |                        | 221073_s_at | -1.58       | 4.41E-05 |
| RANBP5      | 3843                     | 70572                    | 306182                 |             |             |          |
| ARF6        | 382                      | 11845                    | 79121                  | 214182_at   | 2.228755342 | 2.60E-04 |
| USP11       | 8237                     | 236733                   | 408217                 | 208723_at   | -1.89       | 3.38E-08 |
| AREG        | 374                      | 11839                    | 29183                  |             |             |          |
| STK10       | 6793                     | 20868                    | 29398                  | 40420_at    | -1.59       | 2.55E-05 |
| LYK5        | 92335                    | 72149                    | 303605                 | 221554_at   | -1.77       | 2.32E-04 |
| ARF5        | 381                      | 11844                    | 79117                  |             |             |          |
| KPNB1       | 3837                     | 16211                    | 24917                  |             |             |          |
| CDC37       | 11140                    | 12539                    | 114562                 |             |             |          |
| STK11       | 6794                     | 20869                    | 314621                 |             |             |          |
| HRAS        | 3265                     | 15461                    | 293621                 |             |             |          |
| NUP62       | 23636                    | 18226                    | 65274                  | 207740_s_at | -2.74       | 2.30E-10 |
| ELK1        | 2002                     | 13712                    |                        |             |             |          |
| CAB39       | 51719                    | 12283                    | 301574                 |             |             |          |
| CDK9        | 1025                     | 107951                   | 362110                 | 203198_at   | -1.87       | 1.03E-04 |
| RAN         | 5901                     | 19384                    | 84509                  |             |             |          |
| RASSF5      | 83593                    | 54354                    | 54355                  |             |             |          |

| Gene Symbol | Entrez Gene ID<br>for Human | Entrez Gene ID<br>for Mouse | Entrez Gene ID<br>for Rat | Affymetrix         | Fold Change | p-value  |
|-------------|-----------------------------|-----------------------------|---------------------------|--------------------|-------------|----------|
| MT2A        | 4502                        | 17750                       |                           |                    |             |          |
| SLC2A4RG    | 56731                       | 170753                      |                           | 218494_s_at        | -1.87       | 1.18E-04 |
| CLASP1      | 23332                       | 76707                       |                           | 212752_at          | -1.53       | 2.77E-04 |
| CABIN1      | 23523                       | 104248                      |                           | 94165 37652_at     | -1.51       | 9.91E-04 |
| ASAH1       | 427                         | 11886                       |                           | 84431 213902_at    | 1.55091075  | 3.20E-04 |
| C21orf33    | 8209                        | 28295                       | 24,339,294,326            | 202217_at          | -1.55       | 2.80E-06 |
| MEF2A       | 4205                        | 17258                       |                           |                    |             |          |
| SP3         | 6670                        | 20687                       |                           | 25161              |             |          |
| HES1        | 3280                        | 15205                       |                           | 29577              |             |          |
| PRKCZ       | 5590                        | 18762                       |                           | 25522 202178_at    | -1.65       | 1.61E-05 |
| KLF5        | 688                         | 12224                       |                           | 84410              |             |          |
| RGS2        | 5997                        | 19735                       |                           | 84583              |             |          |
| MHC2TA      | 4261                        | 12265                       |                           | 85483              |             |          |
| RABEP2      | 79874                       | 70314                       |                           | 80754 74694_s_at   | -1.63       | 3.57E-06 |
| RGS16       | 6004                        | 19734                       |                           | 25535              |             |          |
| PEA15       | 8682                        | 18611                       |                           |                    |             |          |
| PDGFA       | 5154                        | 18590                       |                           | 25266              |             |          |
| FOSL1       | 8061                        | 14283                       |                           | 25445              |             |          |
| SF1         | 7536                        | 22668                       |                           | 117855 208313_s_at | -1.79       | 1.45E-06 |
| HDAC1       | 3065                        | 15181                       |                           | 84576              |             |          |
| GSPT1       | 2935                        | 14852                       |                           | 24420 215438_x_at  | 2.176301792 | 7.91E-04 |
| STAR        | 6770                        | 20845                       |                           | 25557              |             |          |
| DIABLO      | 56616                       | 66593                       |                           |                    |             |          |
| ABHD5       | 51099                       | 67469                       |                           | 316122 213805_at   | 2.118809251 | 4.98E-04 |
| PLIN        | 5346                        | 103968                      |                           | 25629              |             |          |
| SLC2A4      | 6517                        | 20528                       |                           | 25139              |             |          |
| PPARD       | 5467                        | 19015                       |                           | 25682              |             |          |
| ECGF1       | 1890                        | 72962                       |                           | 217497_at          | -2.43       | 5.13E-06 |
| RFP         | 5987                        | 19720                       |                           | 212118_at          | -1.52       | 2.67E-04 |
| BRE         | 9577                        | 107976                      |                           | 362704 212645_x_at | -1.64       | 1.15E-04 |
| TNF         | 7124                        | 21926                       |                           | 24835              |             |          |
| MEF2D       | 4209                        | 17261                       |                           | 81518              |             |          |
| SAP30       | 8819                        | 60406                       |                           |                    |             |          |
| PML         | 5371                        | 18854                       |                           |                    |             |          |
| NRIP1       | 8204                        | 268903                      |                           | 202600_s_at        | 1.760374901 | 5.33E-04 |

| Gene Symbol | Entrez Gene ID<br>for Human | Entrez Gene ID<br>for Mouse | Entrez Gene ID<br>for Rat | Affymetrix  | Fold Change | p-value  |
|-------------|-----------------------------|-----------------------------|---------------------------|-------------|-------------|----------|
| YWHAG       | 7532                        | 22628                       | 56010                     |             |             |          |
| PCNT2       | 5116                        | 18541                       |                           | 203660_s_at | -1.5        | 2.82E-04 |
| GSK3B       | 2932                        | 56637                       | 84027                     |             |             |          |
| UBE1L       | 7318                        | 74153                       |                           | 203281_s_at | -1.62       | 4.25E-04 |
| LARP        | 23367                       | 73158                       |                           | 212193_s_at | -2.68       | 1.74E-07 |
| ABLIM1      | 3983                        | 226251                      | 307989                    | 210461_s_at | -1.92       | 1.02E-04 |
| GNAI2       | 2771                        | 14678                       | 81664                     | 201040_at   | -2.29       | 2.54E-06 |
| NDE1        | 54820                       | 67203                       | 83836                     |             |             |          |
| ZFP36       | 7538                        | 22695                       | 79426                     |             |             |          |
| TUBG1       | 7283                        | 103733                      | 252921                    |             |             |          |
| ILK         | 3611                        | 16202                       | 170922                    |             |             |          |
| ECHS1       | 1892                        | 93747                       | 140547                    | 201135_at   | -1.5        | 1.52E-04 |
| MARK2       | 2011                        | 13728                       | 60328                     | 203942_s_at | -4.63       | 4.47E-06 |
| PARD3       | 56288                       | 93742                       | 81918                     |             |             |          |
| DVL1        | 1855                        | 13542                       | 83721                     |             |             |          |
| TRIM28      | 10155                       | 21849                       | 116698                    | 200990_at   | -1.8        | 1.01E-04 |
| YWHAQ       | 10971                       | 22630                       | 25577                     |             |             |          |
| RGS12       | 6002                        | 71729                       | 54292                     |             |             |          |
| YWHAH       | 7533                        | 22629                       | 25576                     |             |             |          |
| PRDX1       | 5052                        | 18477                       | 117254                    |             |             |          |
| MAP3K3      | 4215                        | 26406                       |                           | 203514_at   | -3.66       | 2.57E-08 |
| MAPT        | 4137                        | 17762                       | 29477                     |             |             |          |
| GH1         | 2688                        | 14599                       | 24391                     |             |             |          |
| GPSM3       | 63940                       | 106512                      |                           | 204265_s_at | -1.76       | 4.64E-04 |
| YWHA E      | 7531                        | 22627                       | 29753                     |             |             |          |
| MAPKAPK2    | 9261                        | 17164                       | 289014                    |             |             |          |
| YWHA Z      | 7534                        | 22631                       | 25578                     |             |             |          |
| YWHAB       | 7529                        | 54401                       | 56011                     |             |             |          |
| TSC1        | 7248                        | 64930                       | 60445                     |             |             |          |
| SH2B        | 25970                       | 20399                       | 89817                     |             |             |          |
| ILKAP       | 80895                       | 67444                       | 64538                     | 221548_s_at | -1.57       | 3.43E-05 |
| PPFIBP1     | 8496                        | 67533                       |                           | 203735_x_at | 2.165094969 | 8.16E-04 |
| TP53BP2     | 7159                        | 209456                      |                           |             |             |          |
| EDG4        | 9170                        | 53978                       | 361131                    | 206722_s_at | -1.59       | 2.50E-04 |
| GCN1L1      | 10985                       | 231659                      | 304538                    | 212139_at   | -1.59       | 3.16E-06 |

| Gene Symbol | Entrez Gene ID for Human | Entrez Gene ID for Mouse | Entrez Gene ID for Rat | Affymetrix  | Fold Change | p-value  |
|-------------|--------------------------|--------------------------|------------------------|-------------|-------------|----------|
| NSEP1       | 4904                     | 22608                    | 29206                  |             |             |          |
| NFIC        | 4782                     | 18029                    | 29228                  | 206929_s_at | -2.29       | 1.51E-04 |
| PRPF8       | 10594                    | 192159                   |                        | 200000_s_at | -1.54       | 1.08E-04 |
| BIRC3       | 330                      | 11797                    | 78971                  |             |             |          |
| TYRP1       | 7306                     | 22178                    | 298182                 |             |             |          |
| SH2D1A      | 4068                     | 20400                    | 58929                  |             |             |          |
| TNFSF14     | 8740                     | 50930                    |                        | 207907_at   | -1.77       | 5.56E-06 |
| RELA        | 5970                     | 19697                    | 309165                 |             |             |          |
| LY9         | 4063                     | 17085                    |                        | 215967_s_at | -1.57       | 6.53E-05 |
| CD244       | 51744                    | 18106                    | 64025                  |             |             |          |
| TPO         | 7173                     | 22018                    | 54314                  |             |             |          |
| CYLN2       | 7461                     | 269713                   | 29264                  | 211031_s_at | -2.29       | 2.68E-04 |
| TNFRSF10B   | 8795                     | 21933                    | 364420                 |             |             |          |
| TPMT        | 7172                     | 22017                    | 83497                  | 203672_x_at | 1.717112435 | 7.83E-04 |
| SMNDC1      | 10285                    | 76479                    |                        |             |             |          |
| CASP5       | 838                      |                          |                        | 207500_at   | 1.633505685 | 8.22E-04 |
| TNFSF12     | 8742                     | 21944                    | 360548                 |             |             |          |
| ELAVL1      | 1994                     | 15568                    | 114013                 |             |             |          |
| LOX         | 4015                     | 16948                    | 24914                  |             |             |          |
| DDIT3       | 1649                     | 13198                    | 29467                  |             |             |          |
| TAP1        | 6890                     | 21354                    | 24811                  |             |             |          |
| FOXE1       | 2304                     | 110805                   | 192274                 |             |             |          |
| TFEB        | 7942                     | 21425                    |                        | 221866_at   | -1.63       | 3.90E-04 |
| REN         | 5972                     | 1,970,119,702            | 24715                  |             |             |          |
| CFTR        | 1080                     | 12638                    | 24255                  |             |             |          |
| DDX23       | 9416                     | 74351                    |                        | 201440_at   | -2.15       | 1.72E-04 |
| TNFRSF6B    | 8771                     |                          |                        |             |             |          |
| TNPO2       | 30000                    | 212999                   |                        | 221506_s_at | -1.68       | 3.67E-06 |
| FCER2       | 2208                     | 14128                    | 171075                 |             |             |          |
| IL24        | 11009                    | 93672                    | 170819                 |             |             |          |
| CYB561      | 1534                     | 13056                    | 303601                 | 209163_at   | -1.58       | 2.77E-04 |
| IFNG        | 3458                     | 15978                    | 25712                  |             |             |          |
| CD84        | 8832                     | 12523                    |                        | 205988_at   | -1.54       | 1.40E-05 |
| CX3CL1      | 6376                     | 20312                    | 89808                  |             |             |          |
| C13orf12    | 51371                    | 66537                    |                        | 217769_s_at | 1.647687867 | 3.13E-04 |

| Gene Symbol | Entrez Gene ID<br>for Human | Entrez Gene ID<br>for Mouse | Entrez Gene ID<br>for Rat | Affymetrix  | Fold Change | p-value  |
|-------------|-----------------------------|-----------------------------|---------------------------|-------------|-------------|----------|
| GRB2        | 2885                        | 14784                       | 81504                     |             |             |          |
| KLC2        | 64837                       | 16594                       | 309159                    |             |             |          |
| MOS         | 4342                        | 17451                       | 24559                     |             |             |          |
| EPHA2       | 1969                        | 13836                       | 366492                    |             |             |          |
| CD72        | 971                         | 12517                       |                           | 215925_s_at | -1.76       | 3.78E-04 |
| CYP2E1      | 1571                        | 13106                       | 25086                     |             |             |          |
| PHC1        | 1911                        | 13619                       |                           | 218338_at   | -2.08       | 6.39E-05 |
| SFRS3       | 6428                        | 20383                       |                           |             |             |          |
| KIF5A       | 3798                        | 16572                       | 314906                    |             |             |          |
| APP         | 351                         | 11820                       | 54226                     |             |             |          |
| KNS2        | 3831                        | 16593                       | 171041                    |             |             |          |
| KIF5C       | 3800                        | 16574                       |                           |             |             |          |
| FSHR        | 2492                        | 14309                       | 25449                     | 211201_at   | 2.086924539 | 6.12E-04 |
| IGF1        | 3479                        | 16000                       | 24482                     |             |             |          |
| PTPN1       | 5770                        | 19246                       | 24697                     |             |             |          |
| IL6         | 3569                        | 16193                       | 24498                     |             |             |          |
| SNRPA       | 6626                        | 53607                       |                           | 201770_at   | -1.7        | 4.67E-06 |
| DCTN1       | 1639                        | 13191                       | 29167                     | 201082_s_at | -1.68       | 4.39E-04 |
| ADAM9       | 8754                        | 11502                       | 57024                     | 202381_at   | 1.835355529 | 5.53E-04 |
| LNK         | 10019                       | 16923                       | 58838                     |             |             |          |
| ITGB3       | 3690                        | 16416                       | 29302                     |             |             |          |
| CLK2        | 1196                        | 12748                       |                           | 203229_s_at | -1.67       | 1.26E-05 |
| FOXO1A      | 2308                        | 56458                       | 84482                     | 202723_s_at | -2.7        | 3.06E-08 |
| PHKA2       | 5256                        | 110094                      | 25189                     | 209439_s_at | -1.51       | 3.10E-05 |
| MAPK1       | 5594                        | 26413                       | 116590                    |             |             |          |
| KIF5B       | 3799                        | 16573                       | 117550                    | 201991_s_at | 1.670412593 | 2.51E-06 |
| DOC-1R      | 10263                       | 52004                       |                           | 203252_at   | -1.69       | 2.03E-05 |
| MAPT        | 4137                        | 17762                       | 29477                     |             |             |          |
| RPS6KA3     | 6197                        | 110651                      | 363468                    |             |             |          |
| IGFBP1      | 3484                        | 16006                       | 25685                     |             |             |          |
| CDK5        | 1020                        | 12568                       | 140908                    |             |             |          |
| ENO2        | 2026                        | 13807                       | 24334                     | 201313_at   | -1.6        | 3.67E-04 |
| ICAM3       | 3385                        | 107628                      |                           |             |             |          |
| HOXA5       | 3202                        | 15402                       | 79241                     |             |             |          |
| SCAP2       | 8935                        | 54353                       | 155183                    | 216899_s_at | -1.78       | 5.56E-04 |

| Gene Symbol | Entrez Gene ID<br>for Human | Entrez Gene ID<br>for Mouse | Entrez Gene ID<br>for Rat | Affymetrix  | Fold Change | p-value  |
|-------------|-----------------------------|-----------------------------|---------------------------|-------------|-------------|----------|
| TYMS        | 7298                        | 22171                       | 29261                     |             |             |          |
| BTF3        | 689                         | 218490                      |                           | 214800_x_at | 1.886764471 | 5.34E-04 |
| PDGFRB      | 5159                        | 18596                       | 24629                     |             |             |          |
| CUGBP1      | 10658                       | 13046                       |                           | 209489_at   | -1.64       | 2.53E-05 |
| TDG         | 6996                        | 21665                       | 114521                    |             |             |          |
| HNRPU       | 3192                        | 51810                       | 117280                    |             |             |          |
| TCF7        | 6932                        | 21414                       |                           | 205254_x_at | -2.01       | 2.83E-05 |
| TACC1       | 6867                        | 320165                      | 306562                    | 217437_s_at | -1.78       | 7.87E-06 |
| CSNK1A1     | 1452                        | 93687                       | 113927                    |             |             |          |
| VHL         | 7428                        | 22346                       | 24874                     |             |             |          |
| SENP3       | 26168                       | 80886                       |                           | 203871_at   | -2.6        | 3.80E-06 |
| ING3        | 54556                       | 71777                       |                           | 205070_at   | 1.601416567 | 4.14E-04 |
| RUVBL1      | 8607                        | 56505                       | 65137                     |             |             |          |
| AFP         | 174                         | 11576                       | 24177                     |             |             |          |
| MYC         | 4609                        | 17869                       | 24577                     |             |             |          |
| SDCBP       | 6386                        | 53378                       | 83841                     |             |             |          |
| MAP4        | 4134                        | 17758                       | 367171                    |             |             |          |
| AHCYL1      | 10768                       | 229709                      |                           |             |             |          |
| CTNNB1      | 1499                        | 12387                       | 84,353,252,926            |             |             |          |
| HMG2        | 3151                        | 15331                       | 114637                    |             |             |          |
| ACP1        | 52                          | 11431                       | 24161                     |             |             |          |
| PBX2        | 5089                        | 18515                       | 406164                    |             |             |          |
| RANGAP1     | 5905                        | 19387                       | 362965                    |             |             |          |
| SUMO2       | 6613                        | 170930                      | 171127                    |             |             |          |
| ILF3        | 3609                        | 16201                       | 84472                     | 217804_s_at | -2.06       | 3.50E-07 |
| SNRP70      | 6625                        | 20637                       | 361574                    | 201221_s_at | -1.53       | 9.22E-06 |
| CSNK1G2     | 1455                        | 103236                      | 65278                     | 202574_s_at | -2          | 8.08E-05 |
| POLRMT      | 5442                        | 216151                      |                           | 203782_s_at | -1.68       | 1.28E-05 |
| TRRAP       | 8295                        | 100683                      | 288471                    |             |             |          |
| PBXIP1      | 57326                       | 229534                      |                           | 212259_s_at | -2.29       | 8.30E-05 |
| HOXA9       | 3205                        | 15405                       | 297099                    |             |             |          |
| SUMO1       | 7341                        | 22218                       | 301442                    |             |             |          |
| BAT1        | 7919                        | 53817                       | 114612                    | 200041_s_at | -1.67       | 3.36E-05 |
| NLK         | 51701                       | 18099                       | 363647                    |             |             |          |
| CPT2        | 1376                        | 12896                       | 25413                     | 204263_s_at | -3.56       | 1.56E-06 |

| Gene Symbol | Entrez Gene ID<br>for Human | Entrez Gene ID<br>for Mouse | Entrez Gene ID<br>for Rat | Affymetrix  | Fold Change | p-value  |
|-------------|-----------------------------|-----------------------------|---------------------------|-------------|-------------|----------|
| TYMS        | 7298                        | 22171                       | 29261                     |             |             |          |
| DF          | 1675                        | 11537                       | 54249                     |             |             |          |
| SHOX        | 6473                        |                             |                           |             |             |          |
| CEBPA       | 1050                        | 12606                       | 24252                     |             |             |          |
| LIG1        | 3978                        | 16881                       | 81513                     | 202726_at   | -1.74       | 9.25E-04 |
| CDKN1A      | 1026                        | 12575                       | 114851                    |             |             |          |
| FGF7        | 2252                        | 14178                       | 29348                     |             |             |          |
| TREX1       | 11277                       | 22040                       |                           | 205875_s_at | -2.11       | 4.26E-04 |
| HES1        | 3280                        | 15205                       | 29577                     |             |             |          |
| MAP2K5      | 5607                        | 23938                       | 29568                     | 204756_at   | -2.54       | 4.01E-04 |
| TCN2        | 6948                        | 21452                       | 64365                     |             |             |          |
| CRADD       | 8738                        | 12905                       |                           |             |             |          |
| COPS6       | 10980                       | 26893                       |                           |             |             |          |
| TRIM14      | 9830                        | 74735                       |                           | 203147_s_at | -1.87       | 2.36E-04 |
| APRT        | 353                         | 11821                       |                           | 203219_s_at | -1.53       | 3.45E-05 |
| ICAM2       | 3384                        | 15896                       | 360647                    |             |             |          |
| ATR         | 545                         | 245000                      | 300942                    |             |             |          |
| GAA         | 2548                        | 14387                       | 367562                    | 202812_at   | -1.78       | 1.87E-04 |
| GPS2        | 2874                        | 56310                       |                           |             |             |          |
| MCM3        | 4172                        | 17215                       | 316273                    |             |             |          |
| COPS8       | 10920                       | 108679                      |                           |             |             |          |
| MCM4        | 4173                        | 17217                       | 29,728,310,429            |             |             |          |
| COPS7A      | 50813                       | 26894                       |                           |             |             |          |
| CDKN1B      | 1027                        | 12576                       | 83571                     |             |             |          |
| CYP1B1      | 1545                        | 13078                       | 25426                     | 202437_s_at | 2.277312154 | 4.68E-04 |
| RPA2        | 6118                        | 19891                       | 59102                     |             |             |          |
| CTCF        | 10664                       | 13018                       | 83726                     |             |             |          |
| HKR3        | 3104                        | 100090                      |                           | 205025_at   | -1.88       | 7.13E-04 |
| H2AFX       | 3014                        | 15270                       | 300668                    | 205436_s_at | -1.8        | 5.25E-05 |
| G0S2        | 50486                       | 14373                       |                           | 213524_s_at | 1.75226866  | 7.27E-05 |
| MCM5        | 4174                        | 17218                       | 291885                    | 201755_at   | -1.77       | 4.65E-04 |
| PAX3        | 5077                        | 18505                       | 114502                    |             |             |          |
| COPS7B      | 64708                       | 26895                       |                           | 219997_s_at | -1.59       | 9.85E-06 |
| ACSL1       | 2180                        | 14081                       | 25288                     | 201963_at   | 1.740457922 | 9.76E-04 |
| E2F1        | 1869                        | 13555                       | 399489                    |             |             |          |



| Gene Symbol | Entrez Gene ID<br>for Human | Entrez Gene ID<br>for Mouse | Entrez Gene ID<br>for Rat | Affymetrix  | Fold Change | p-value  |
|-------------|-----------------------------|-----------------------------|---------------------------|-------------|-------------|----------|
| SMARCE1     | 6605                        | 57376                       | 303518                    |             |             |          |
| SFTPB       | 6439                        | 20388                       | 192155                    |             |             |          |
| SMARCA4     | 6597                        | 20586                       | 171379                    |             |             |          |
| FOSL2       | 2355                        | 14284                       | 25446                     |             |             |          |
| DHX9        | 1660                        | 13211                       |                           |             |             |          |
| TIMM22      | 29928                       | 56322                       | 79463                     | 219184_x_at | -2.46       | 8.38E-09 |
| PPARGC1A    | 10891                       | 19017                       | 83516                     |             |             |          |
| TUBB        | 203068                      | 22154                       | 29214                     | 209026_x_at | -1.54       | 1.53E-04 |
| EWSR1       | 2130                        | 14030                       | 289752                    |             |             |          |
| SERPINE2    | 5270                        | 20720                       | 29366                     |             |             |          |
| KPNA2       | 3838                        | 16647                       | 85245                     |             |             |          |
| FOS         | 2353                        | 14281                       | 24,371,314,322            |             |             |          |
| MAFG        | 4097                        | 17134                       | 64188                     | 204970_s_at | -1.74       | 5.20E-04 |
| DPF2        | 5977                        | 19708                       |                           | 202116_at   | -1.69       | 3.12E-04 |
| CTSH        | 1512                        | 13036                       | 25425                     |             |             |          |
| CARM1       | 10498                       | 59035                       |                           |             |             |          |
| NMI         | 9111                        | 64685                       |                           |             |             |          |
| SRCAP       | 10847                       | 338353                      |                           | 212275_s_at | -1.67       | 3.01E-04 |
| CREBBP      | 1387                        | 12914                       | 54244                     |             |             |          |
| POLR2A      | 5430                        | 20020                       | 363633                    |             |             |          |
| NFE2        | 4778                        | 18022                       |                           |             |             |          |
| SUPT5H      | 6829                        | 20924                       | 308472                    |             |             |          |
| RPS6KA3     | 6197                        | 110651                      | 363468                    |             |             |          |
| TGFBR3      | 7049                        | 21814                       | 29610                     | 204731_at   | -1.97       | 4.72E-05 |
| EGR2        | 1959                        | 13654                       | 114090                    |             |             |          |
| SUPT6H      | 6830                        | 20926                       |                           | 208420_x_at | -1.53       | 9.12E-04 |
| TGOLN2      | 10618                       | 22135                       | 192152                    | 212040_at   | -1.76       | 6.18E-05 |
| ESRRA       | 2101                        | 26379                       | 293701                    |             |             |          |
| KPNA6       | 23633                       | 16650                       |                           | 212103_at   | -2.19       | 4.86E-06 |
| KCNJ2       | 3759                        | 16518                       | 29712                     | 206765_at   | 1.635168355 | 3.11E-05 |
| RELB        | 5971                        | 19698                       | 365510                    |             |             |          |
| SPIB        | 6689                        | 272382                      |                           | 205861_at   | -1.71       | 3.44E-04 |
| PELP1       | 27043                       | 75273                       |                           |             |             |          |
| CPSF1       | 29894                       | 94230                       | 366952                    | 201639_s_at | -1.88       | 2.65E-06 |
| POLR2C      | 5432                        | 20021                       | 361365                    |             |             |          |
